# Supplementary material for: Preparation of monocarbonyl ruthenium complexes bearing bidentate nitrogen and phosphine ligands and their catalytic activity in carbonyl compound reduction
Source: Royal Society of Chemistry journal article supplement (doi:10.1039/c9dt02616a), 2019-01-01
Supplement: c9dt02616a1.pdf [file c9dt02616a1.pdf]

## Preparation of Monocarbonyl Ruthenium Complexes Bearing Bidentate Nitrogen and Phosphine Ligands and their Catalytic Activity in the Carbonyl Compound Reduction.

Steven Giboulot,<sup>a,b</sup> Clara Comuzzi,<sup>a</sup> Alessandro Del Zotto,<sup>a</sup> Rosario Figliolia,<sup>a</sup> Giovanna Lippe,<sup>a</sup> Denise Lovison,<sup>a</sup> Paolo Strazzolini,<sup>a</sup> Sabina Susmel,<sup>a</sup> Ennio Zangrando,<sup>c</sup> Daniele Zuccaccia,<sup>a</sup> Salvatore Baldino,<sup>a,d</sup> Maurizio Ballico,<sup>a,\*</sup> Walter Baratta<sup>a,\*</sup>

### Supporting Information

#### Table of Contents:

|                                                                                                                                                                                                                                   |          |
|-----------------------------------------------------------------------------------------------------------------------------------------------------------------------------------------------------------------------------------|----------|
| <b>Figure S1.</b> <sup>31</sup> P{ <sup>1</sup> H} NMR spectrum of <i>trans</i> -[RuCl <sub>2</sub> (CO)(PCy <sub>3</sub> )(en)] ( <b>1</b> )                                                                                     | Pag. S1  |
| <b>Figure S2.</b> <sup>1</sup> H NMR spectrum of <i>trans</i> -[RuCl <sub>2</sub> (CO)(PCy <sub>3</sub> )(en)] ( <b>1</b> )                                                                                                       | Pag. S2  |
| <b>Figure S3.</b> <sup>13</sup> C{ <sup>1</sup> H} PENDANT NMR spectrum of <i>trans</i> -[RuCl <sub>2</sub> (CO)(PCy <sub>3</sub> )(en)] ( <b>1</b> )                                                                             | Pag. S3  |
| <b>Figure S4.</b> <sup>31</sup> P{ <sup>1</sup> H} NMR spectrum of <i>trans</i> -[RuCl <sub>2</sub> (CO)(PCy <sub>3</sub> )(ampy)] ( <b>2</b> )                                                                                   | Pag. S4  |
| <b>Figure S5.</b> <sup>1</sup> H NMR spectrum of <i>trans</i> -[RuCl <sub>2</sub> (CO)(PCy <sub>3</sub> )(ampy)] ( <b>2</b> )                                                                                                     | Pag. S5  |
| <b>Figure S6.</b> <sup>13</sup> C{ <sup>1</sup> H} PENDANT NMR spectrum of <i>trans</i> -[RuCl <sub>2</sub> (CO)(PCy <sub>3</sub> )(ampy)] ( <b>2</b> )                                                                           | Pag. S6  |
| <b>Figure S7.</b> <sup>31</sup> P{ <sup>1</sup> H} NMR spectrum of <i>trans</i> -[RuCl <sub>2</sub> (CO)(PiPr <sub>3</sub> )(en)] ( <b>3</b> )                                                                                    | Pag. S7  |
| <b>Figure S8.</b> <sup>1</sup> H NMR spectrum of <i>trans</i> -[RuCl <sub>2</sub> (CO)(PiPr <sub>3</sub> )(en)] ( <b>3</b> )                                                                                                      | Pag. S8  |
| <b>Figure S9.</b> <sup>13</sup> C{ <sup>1</sup> H} PENDANT NMR spectrum of <i>trans</i> -[RuCl <sub>2</sub> (CO)(PiPr <sub>3</sub> )(en)] ( <b>3</b> )                                                                            | Pag. S9  |
| <b>Figure S10.</b> <sup>31</sup> P{ <sup>1</sup> H} NMR spectrum of [Ru(OAc)(CO)(PPh <sub>3</sub> )(en)]OAc ( <b>4</b> )                                                                                                          | Pag. S10 |
| <b>Figure S11.</b> <sup>1</sup> H NMR spectrum of [Ru(OAc)(CO)(PPh <sub>3</sub> )(en)]OAc ( <b>4</b> )                                                                                                                            | Pag. S11 |
| <b>Figure S12.</b> <sup>13</sup> C{ <sup>1</sup> H} DEPTQ spectrum of [Ru(OAc)(CO)(PPh <sub>3</sub> )(en)]OAc ( <b>4</b> )                                                                                                        | Pag. S12 |
| <b>Figure S13.</b> Control <sup>31</sup> P{ <sup>1</sup> H} NMR spectrum of the mixture of [Ru(OAc)(CO)(PPh <sub>3</sub> )(en)]OAc ( <b>4</b> ) and <i>trans</i> -[Ru(OAc) <sub>2</sub> (CO)(PPh <sub>3</sub> )(en)] ( <b>B</b> ) | Pag. S13 |
| <b>Figure S14.</b> Control <sup>1</sup> H NMR spectrum of the mixture of [Ru(OAc)(CO)(PPh <sub>3</sub> )(en)]OAc ( <b>4</b> ) and <i>trans</i> -[Ru(OAc) <sub>2</sub> (CO)(PPh <sub>3</sub> )(en)] ( <b>B</b> )                   | Pag. S14 |

|                                                                                                                                                                                                                                                                                   |          |
|-----------------------------------------------------------------------------------------------------------------------------------------------------------------------------------------------------------------------------------------------------------------------------------|----------|
| <b>Figure S15.</b> $^{31}\text{P}\{^1\text{H}\}$ NMR spectrum of $[\text{Ru}(\text{OAc})(\text{CO})(\text{PPh}_3)(\text{ampy})]\text{OAc}$ ( <b>5</b> )                                                                                                                           | Pag. S15 |
| <b>Figure S16.</b> $^1\text{H}$ NMR spectrum of $[\text{Ru}(\text{OAc})(\text{CO})(\text{PPh}_3)(\text{ampy})]\text{OAc}$ ( <b>5</b> )                                                                                                                                            | Pag. S16 |
| <b>Figure S17.</b> $^{13}\text{C}\{^1\text{H}\}$ DEPTQ spectrum of $[\text{Ru}(\text{OAc})(\text{CO})(\text{PPh}_3)(\text{ampy})]\text{OAc}$ ( <b>5</b> )                                                                                                                         | Pag. S17 |
| <b>Figure S18.</b> Effect of the addition of NaOAc to $[\text{Ru}(\text{OAc})(\text{CO})(\text{ampy})(\text{PPh}_3)]\text{OAc}$ ( <b>5</b> ) in the methyl acetate region of the $^1\text{H}$ NMR spectrum.                                                                       | Pag. S18 |
| <b>Figure S19.</b> Control $^{31}\text{P}\{^1\text{H}\}$ NMR spectrum of the mixture of $[\text{Ru}(\text{OAc})(\text{CO})(\text{PPh}_3)(\text{ampy})]\text{OAc}$ ( <b>5</b> ) and <i>trans</i> - $[\text{Ru}(\text{OAc})_2(\text{CO})(\text{PPh}_3)(\text{ampy})]$ ( <b>B'</b> ) | Pag. S19 |
| <b>Figure S20.</b> Control $^1\text{H}$ NMR spectrum of the mixture of $[\text{Ru}(\text{OAc})(\text{CO})(\text{PPh}_3)(\text{ampy})]\text{OAc}$ ( <b>5</b> ) and <i>trans</i> - $[\text{Ru}(\text{OAc})_2(\text{CO})(\text{PPh}_3)(\text{ampy})]$ ( <b>B'</b> )                  | Pag. S20 |
| <b>Figure S21.</b> $^{31}\text{P}\{^1\text{H}\}$ NMR spectrum of <i>trans</i> - $[\text{RuCl}_2(\text{CO})(\text{dppb})(\text{PPh}_3)]$ ( <b>6</b> )                                                                                                                              | Pag. S21 |
| <b>Figure S22.</b> $^1\text{H}$ NMR spectrum of <i>trans</i> - $[\text{RuCl}_2(\text{CO})(\text{dppb})(\text{PPh}_3)]$ ( <b>6</b> )                                                                                                                                               | Pag. S22 |
| <b>Figure S23.</b> $^{13}\text{C}\{^1\text{H}\}$ DEPTQ NMR spectrum of <i>trans</i> - $[\text{RuCl}_2(\text{CO})(\text{dppb})(\text{PPh}_3)]$ ( <b>6</b> )                                                                                                                        | Pag. S23 |
| <b>Figure S24.</b> $^{31}\text{P}\{^1\text{H}\}$ NMR spectrum of <i>trans</i> - $[\text{RuCl}_2(\text{CO})(\text{dppf})(\text{PPh}_3)]$ ( <b>7</b> )                                                                                                                              | Pag. S24 |
| <b>Figure S25.</b> $^1\text{H}$ NMR spectrum of <i>trans</i> - $[\text{RuCl}_2(\text{CO})(\text{dppf})(\text{PPh}_3)]$ ( <b>7</b> )                                                                                                                                               | Pag. S25 |
| <b>Figure S26.</b> $^{13}\text{C}\{^1\text{H}\}$ DEPTQ NMR spectrum of <i>trans</i> - $[\text{RuCl}_2(\text{CO})(\text{dppf})(\text{PPh}_3)]$ ( <b>7</b> )                                                                                                                        | Pag. S26 |
| <b>Figure S27.</b> $^{31}\text{P}\{^1\text{H}\}$ NMR spectrum of <i>trans</i> - $[\text{RuCl}_2(\text{CO})((R)\text{-BINAP})(\text{PPh}_3)]$ ( <b>8</b> )                                                                                                                         | Pag. S27 |
| <b>Figure S28.</b> $^1\text{H}$ NMR spectrum of <i>trans</i> - $[\text{RuCl}_2(\text{CO})((R)\text{-BINAP})(\text{PPh}_3)]$ ( <b>8</b> )                                                                                                                                          | Pag. S28 |
| <b>Figure S29.</b> $^{13}\text{C}\{^1\text{H}\}$ DEPTQ NMR spectrum of <i>trans</i> - $[\text{RuCl}_2(\text{CO})((R)\text{-BINAP})(\text{PPh}_3)]$ ( <b>8</b> )                                                                                                                   | Pag. S29 |
| <b>Figure S30.</b> $^{31}\text{P}\text{-}^1\text{H}$ HMBC 2D NMR spectrum of <i>trans</i> - $[\text{RuCl}_2(\text{CO})((R)\text{-BINAP})(\text{PPh}_3)]$ ( <b>8</b> )                                                                                                             | Pag. S30 |
| <b>Figure S31.</b> $^{31}\text{P}\{^1\text{H}\}$ NMR spectrum of <i>trans</i> - $[\text{RuCl}_2(\text{CO})((S,R)\text{-Josiphos})(\text{PPh}_3)]$ ( <b>9</b> )                                                                                                                    | Pag. S31 |
| <b>Figure S32.</b> $^1\text{H}$ NMR spectrum of <i>trans</i> - $[\text{RuCl}_2(\text{CO})((S,R)\text{-Josiphos})(\text{PPh}_3)]$ ( <b>9</b> )                                                                                                                                     | Pag. S32 |
| <b>Figure S33.</b> $^{13}\text{C}\{^1\text{H}\}$ DEPTQ NMR spectrum of <i>trans</i> - $[\text{RuCl}_2(\text{CO})((S,R)\text{-Josiphos})(\text{PPh}_3)]$ ( <b>9</b> )                                                                                                              | Pag. S33 |
| <b>Figure S34.</b> $^{31}\text{P}\{^1\text{H}\}$ NMR spectrum of <i>trans</i> - $[\text{RuCl}_2(\text{CO})((R,R)\text{-Skewphos})(\text{PPh}_3)]$ ( <b>10</b> )                                                                                                                   | Pag. S34 |

|                                                                                                                                                   |          |
|---------------------------------------------------------------------------------------------------------------------------------------------------|----------|
| <b>Figure S35.</b> $^1\text{H}$ NMR spectrum of <i>trans</i> -[RuCl <sub>2</sub> (CO)(( <i>R,R</i> )-Skewphos)(PPh <sub>3</sub> )] ( <b>10</b> )  | Pag. S35 |
| <b>Figure S36.</b> $^{31}\text{P}\{^1\text{H}\}$ NMR spectrum of [Ru(OAc) <sub>2</sub> (CO)(dppb)] ( <b>11</b> ) at 20 °C                         | Pag. S36 |
| <b>Figure S37.</b> $^{31}\text{P}\{^1\text{H}\}$ NMR spectrum of [Ru(OAc) <sub>2</sub> (CO)(dppb)] ( <b>11</b> ) at - 60 °C                       | Pag. S37 |
| <b>Figure S38.</b> $^{31}\text{P}\{^1\text{H}\}$ NMR spectrum of [Ru(OAc) <sub>2</sub> (CO)(dppb)] ( <b>11</b> ) at - 80 °C                       | Pag. S38 |
| <b>Figure S39.</b> $^1\text{H}$ NMR spectrum of [[Ru(OAc) <sub>2</sub> (CO)(dppb)] ( <b>11</b> ) at 20 °C                                         | Pag. S39 |
| <b>Figure S40.</b> $^1\text{H}$ NMR spectrum of [Ru(OAc) <sub>2</sub> (CO)(dppb)] ( <b>11</b> ) at - 80 °C                                        | Pag. S40 |
| <b>Figure S41.</b> $^{13}\text{C}\{^1\text{H}\}$ NMR spectrum of [Ru(OAc) <sub>2</sub> (CO)(dppb)] ( <b>11</b> ) at 20 °C                         | Pag. S41 |
| <b>Figure S42.</b> $^{13}\text{C}\{^1\text{H}\}$ PENDANT NMR spectrum of [Ru(OAc) <sub>2</sub> (CO)(dppb)] ( <b>11</b> ) at 20 °C                 | Pag. S42 |
| <b>Figure S43.</b> $^{13}\text{C}\{^1\text{H}\}$ PENDANT NMR spectrum of [Ru(OAc) <sub>2</sub> (CO)(dppb)] ( <b>11</b> ) at - 80 °C               | Pag. S43 |
| <b>Figure S44.</b> $^{31}\text{P}\{^1\text{H}\}$ NMR spectrum of [Ru(OAc) <sub>2</sub> (CO)(dppf)] ( <b>12</b> ) at 20 °C                         | Pag. S44 |
| <b>Figure S45.</b> $^{31}\text{P}\{^1\text{H}\}$ NMR spectrum of [Ru(OAc) <sub>2</sub> (CO)(dppf)] ( <b>12</b> ) at - 70 °C                       | Pag. S45 |
| <b>Figure S46.</b> $^1\text{H}$ NMR spectrum of [Ru(OAc) <sub>2</sub> (CO)(dppf)] ( <b>12</b> ) at 20 °C                                          | Pag. S46 |
| <b>Figure S47.</b> $^1\text{H}$ NMR spectrum of [Ru(OAc) <sub>2</sub> (CO)(dppf)] ( <b>12</b> ) at - 70 °C                                        | Pag. S47 |
| <b>Figure S48.</b> $^{13}\text{C}\{^1\text{H}\}$ PENDANT NMR spectrum of [Ru(OAc) <sub>2</sub> (CO)(dppf)] ( <b>12</b> ) at 20 °C                 | Pag. S48 |
| <b>Figure S49.</b> $^{13}\text{C}\{^1\text{H}\}$ PENDANT NMR spectrum of [Ru(OAc) <sub>2</sub> (CO)(dppf)] ( <b>12</b> ) at - 70 °C               | Pag. S49 |
| <b>Figure S50.</b> $^{31}\text{P}\{^1\text{H}\}$ NMR spectrum of [Ru(OAc) <sub>2</sub> (CO)(( <i>R</i> )-BINAP)] ( <b>13</b> ) at 20 °C           | Pag. S50 |
| <b>Figure S51.</b> $^{31}\text{P}\{^1\text{H}\}$ NMR spectrum of [Ru(OAc) <sub>2</sub> (CO)(( <i>R</i> )-BINAP)] ( <b>13</b> ) at - 60 °C         | Pag. S51 |
| <b>Figure S52.</b> $^1\text{H}$ NMR spectrum of [Ru(OAc) <sub>2</sub> (CO)(( <i>R</i> )-BINAP)] ( <b>13</b> ) at 20 °C                            | Pag. S52 |
| <b>Figure S53.</b> $^1\text{H}$ NMR spectrum of [Ru(OAc) <sub>2</sub> (CO)(( <i>R</i> )-BINAP)] ( <b>13</b> ) at - 60 °C                          | Pag. S53 |
| <b>Figure S54.</b> $^{13}\text{C}\{^1\text{H}\}$ PENDANT NMR spectrum of [Ru(OAc) <sub>2</sub> (CO)(( <i>R</i> )-BINAP)] ( <b>13</b> ) at - 60 °C | Pag. S54 |
| <b>Figure S55.</b> $^{31}\text{P}\{^1\text{H}\}$ NMR spectrum of [Ru(OAc) <sub>2</sub> (CO)(( <i>R,R</i> )-Skewphos)] ( <b>14</b> ) at 20 °C      | Pag. S55 |

|                                                                                                                                                                                                              |          |
|--------------------------------------------------------------------------------------------------------------------------------------------------------------------------------------------------------------|----------|
| <b>Figure S56.</b> $^{31}\text{P}\{^1\text{H}\}$ NMR spectrum of $[\text{Ru}(\text{OAc})_2(\text{CO})((R,R)\text{-Skewphos})]$ ( <b>14</b> ) at $-60\text{ }^\circ\text{C}$                                  | Pag. S56 |
| <b>Figure S57.</b> $^1\text{H}$ NMR spectrum of $[\text{Ru}(\text{OAc})_2(\text{CO})((R,R)\text{-Skewphos})]$ ( <b>14</b> ) at $20\text{ }^\circ\text{C}$                                                    | Pag. S57 |
| <b>Figure S58.</b> $^1\text{H}$ NMR spectrum of $[\text{Ru}(\text{OAc})_2(\text{CO})((R,R)\text{-Skewphos})]$ ( <b>14</b> ) at $-60\text{ }^\circ\text{C}$                                                   | Pag. S58 |
| <b>Figure S59.</b> $^{13}\text{C}\{^1\text{H}\}$ PENDANT NMR spectrum of $[\text{Ru}(\text{OAc})_2(\text{CO})((R,R)\text{-Skewphos})]$ ( <b>14</b> ) at $-60\text{ }^\circ\text{C}$                          | Pag. S59 |
| <b>Figure S60.</b> $^{31}\text{P}\{^1\text{H}\}$ NMR spectrum of $[\text{RuCl}(\text{CO})(\text{dppb})(\text{en})]\text{Cl}$ ( <b>15</b> )                                                                   | Pag. S60 |
| <b>Figure S61.</b> $^1\text{H}$ NMR spectrum of $[\text{RuCl}(\text{CO})(\text{dppb})(\text{en})]\text{Cl}$ ( <b>15</b> )                                                                                    | Pag. S61 |
| <b>Figure S62.</b> $^{13}\text{C}\{^1\text{H}\}$ PENDANT NMR spectrum of $[\text{RuCl}(\text{CO})(\text{dppb})(\text{en})]\text{Cl}$ ( <b>15</b> )                                                           | Pag. S62 |
| <b>Figure S63.</b> $^{31}\text{P}\{^1\text{H}\}$ NMR spectrum of $[\text{RuCl}(\text{CO})(\text{dppf})(\text{en})]\text{Cl}$ ( <b>16</b> )                                                                   | Pag. S63 |
| <b>Figure S64.</b> $^1\text{H}$ NMR spectrum of $[\text{RuCl}(\text{CO})(\text{dppf})(\text{en})]\text{Cl}$ ( <b>16</b> )                                                                                    | Pag. S64 |
| <b>Figure S65.</b> $^{13}\text{C}\{^1\text{H}\}$ PENDANT NMR spectrum of $[\text{RuCl}(\text{CO})(\text{dppf})(\text{en})]\text{Cl}$ ( <b>16</b> )                                                           | Pag. S65 |
| <b>Figure S66.</b> $^{31}\text{P}\{^1\text{H}\}$ NMR spectrum of $[\text{Ru}(\text{OAc})(\text{CO})(\text{dppb})(\text{en})]\text{OAc}$ ( <b>17</b> )                                                        | Pag. S66 |
| <b>Figure S67.</b> $^1\text{H}$ NMR spectrum of $[\text{Ru}(\text{OAc})(\text{CO})(\text{dppb})(\text{en})]\text{OAc}$ ( <b>17</b> )                                                                         | Pag. S67 |
| <b>Figure S68.</b> $^{13}\text{C}\{^1\text{H}\}$ PENDANT NMR spectrum of $[\text{Ru}(\text{OAc})(\text{CO})(\text{dppb})(\text{en})]\text{OAc}$ ( <b>17</b> )                                                | Pag. S68 |
| <b>Figure S69.</b> $^{15}\text{N}\text{-}^1\text{H}$ HSQC 2D NMR spectrum of $[\text{Ru}(\text{OAc})(\text{CO})(\text{dppb})(\text{en})]\text{OAc}$ ( <b>17</b> )                                            | Pag. S69 |
| <b>Figure S70.</b> $^{31}\text{P}\{^1\text{H}\}$ NMR spectrum of $[\text{Ru}(\text{OAc})(\text{CO})(\text{dppb})(\text{ampy})]\text{OAc}$ ( <b>18</b> )                                                      | Pag. S70 |
| <b>Figure S71.</b> $^1\text{H}$ NMR spectrum of $[\text{Ru}(\text{OAc})(\text{CO})(\text{dppb})(\text{ampy})]\text{OAc}$ ( <b>18</b> )                                                                       | Pag. S71 |
| <b>Figure S72.</b> $^{13}\text{C}\{^1\text{H}\}$ PENDANT NMR spectrum of $[\text{Ru}(\text{OAc})(\text{CO})(\text{dppb})(\text{ampy})]\text{OAc}$ ( <b>18</b> )                                              | Pag. S72 |
| <b>Figure S73.</b> $^1\text{H}$ NMR spectrum which evidences of the formation of a ruthenium monohydride species from $[\text{Ru}(\text{OAc})(\text{CO})(\text{dppb})(\text{ampy})]\text{OAc}$ ( <b>18</b> ) | Pag. S73 |
| <b>Figure S74.</b> $^{31}\text{P}\{^1\text{H}\}$ NMR spectrum of $[\text{Ru}(\text{OAc})(\text{CO})(\text{dppf})(\text{en})]\text{OAc}$ ( <b>19</b> )                                                        | Pag. S74 |
| <b>Figure S75.</b> $^1\text{H}$ NMR spectrum of $[\text{Ru}(\text{OAc})(\text{CO})(\text{dppf})(\text{en})]\text{OAc}$ ( <b>19</b> )                                                                         | Pag. S75 |
| <b>Figure S76.</b> $^{13}\text{C}\{^1\text{H}\}$ PENDANT NMR spectrum of $[\text{Ru}(\text{OAc})(\text{CO})(\text{dppf})(\text{en})]\text{OAc}$ ( <b>19</b> )                                                | Pag. S76 |
| <b>Figure S77.</b> $^{31}\text{P}\{^1\text{H}\}$ NMR spectrum of $[\text{Ru}(\text{OAc})(\text{CO})(\text{dppf})(\text{ampy})]\text{OAc}$ ( <b>20</b> )                                                      | Pag. S77 |

**Figure S78.**  $^1\text{H}$  NMR spectrum of  $[\text{Ru}(\text{OAc})(\text{CO})(\text{dppf})(\text{ampy})]\text{OAc}$  (**20**) Pag. S78

**Figure S79.**  $^{13}\text{C}\{^1\text{H}\}$  PENDANT NMR spectrum of  $[\text{Ru}(\text{OAc})(\text{CO})(\text{dppf})(\text{ampy})]\text{OAc}$  (**20**) Pag. S79

**Table S1.** Further data regarding the catalytic TH of acetophenone (0.1 M) with complexes **6-14** (S/C 1000) in 2-propanol at 82 °C Pag. S80

**Table S2.** Further data regarding the catalytic TH of aldehydes and ketones (0.1 M) to alcohols with complexes **1, 3-5** and **15-16** (S/C 1000) in 2-propanol at 82 °C Pag. S81

**Table S3.** Further data regarding the catalytic HY (30 bar) of ketones (2.0 M) to alcohols with complexes **2, 15** and  $\text{KO}t\text{Bu}$  (2 mol%) as base in EtOH at 70 °C Pag. S82

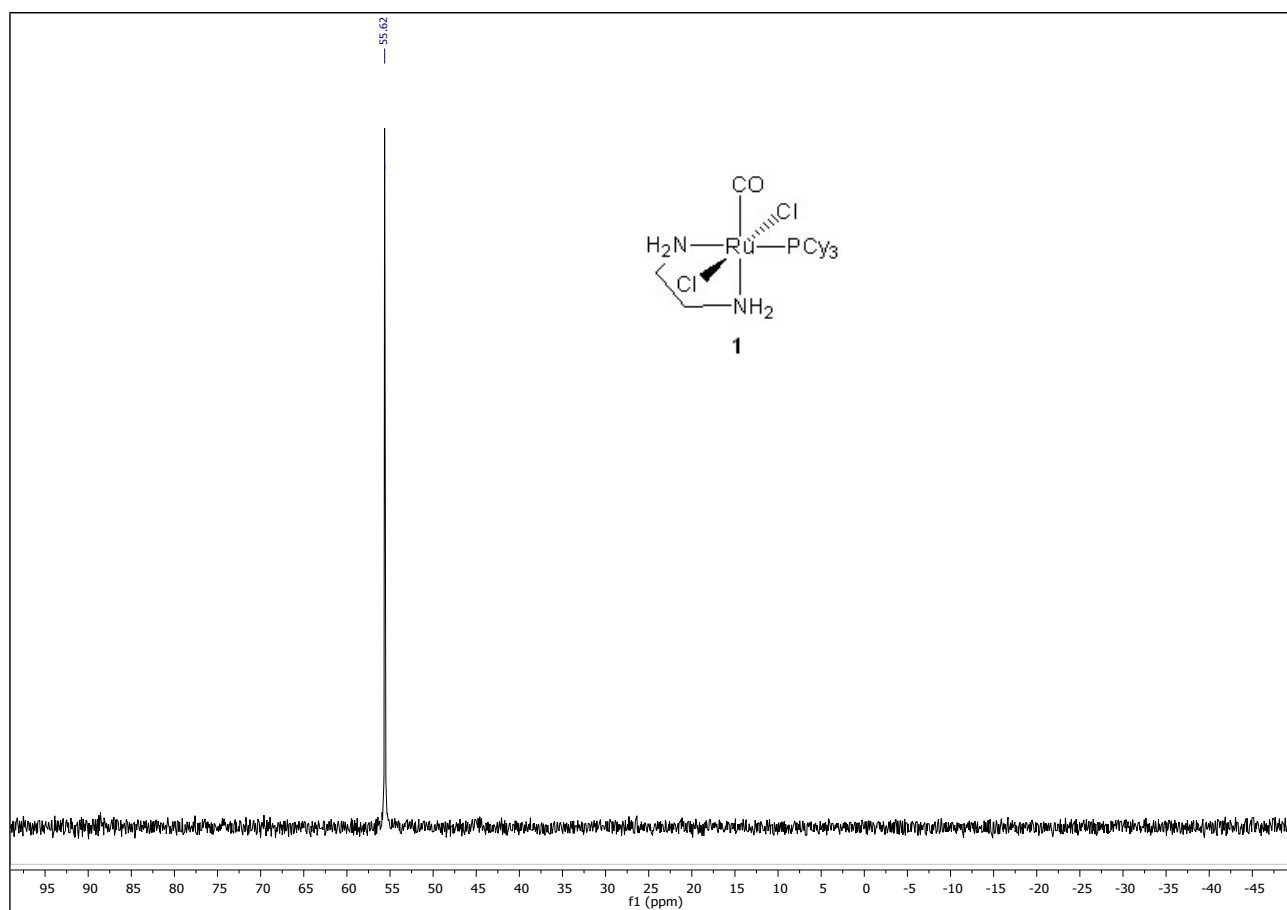

**Figure S1.**  $^{31}\text{P}\{^1\text{H}\}$  NMR spectrum (81.0 MHz) of  $\text{trans-}[\text{RuCl}_2(\text{CO})(\text{PCy}_3)(\text{en})]$  (**1**) in  $\text{CD}_2\text{Cl}_2$  at 20 °C.

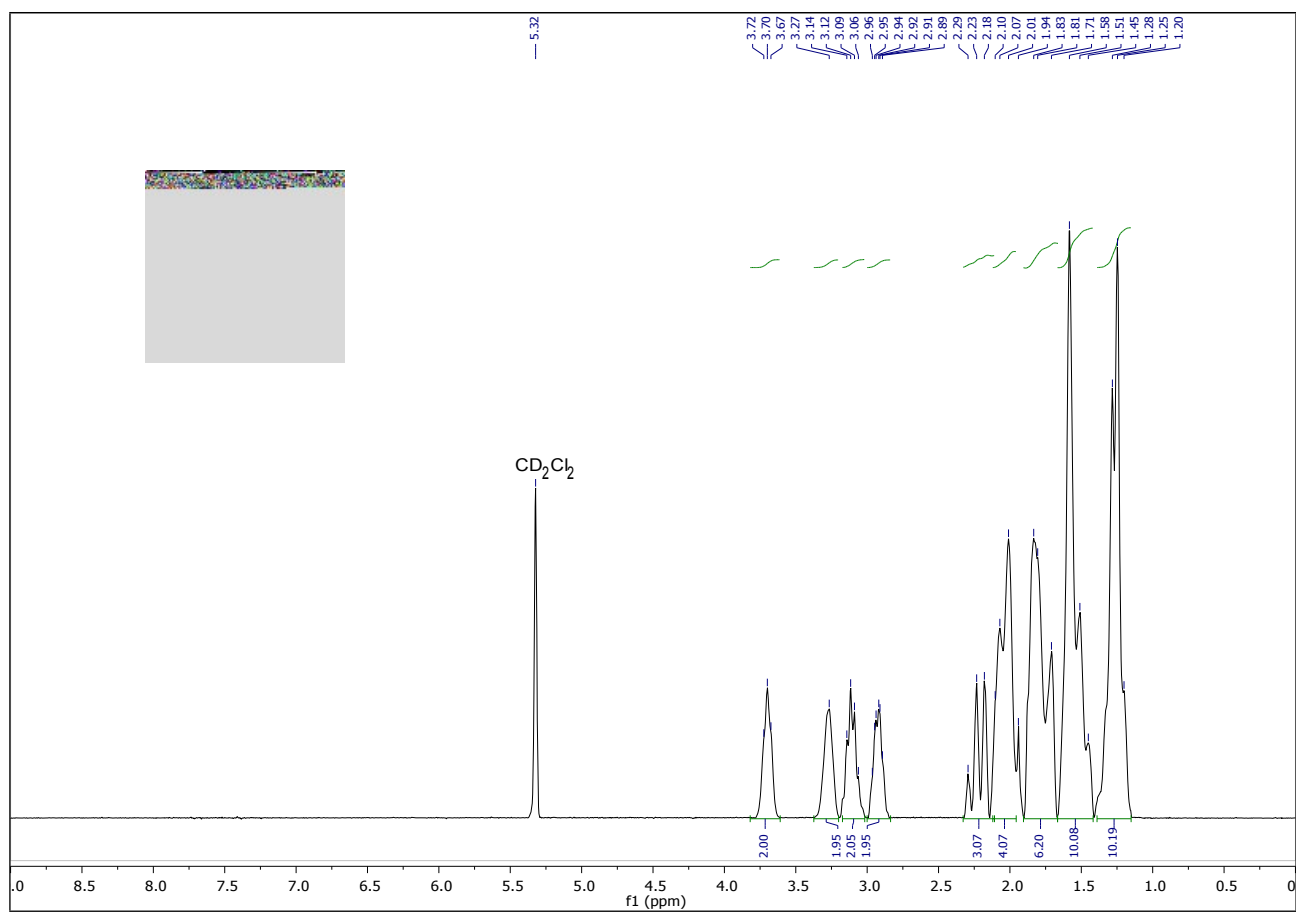

**Figure S2.**  $^1\text{H}$  NMR spectrum (200.1 MHz) of *trans*-[RuCl<sub>2</sub>(CO)(PCy<sub>3</sub>)(en)] (1) in CD<sub>2</sub>Cl<sub>2</sub> at 20 °C.

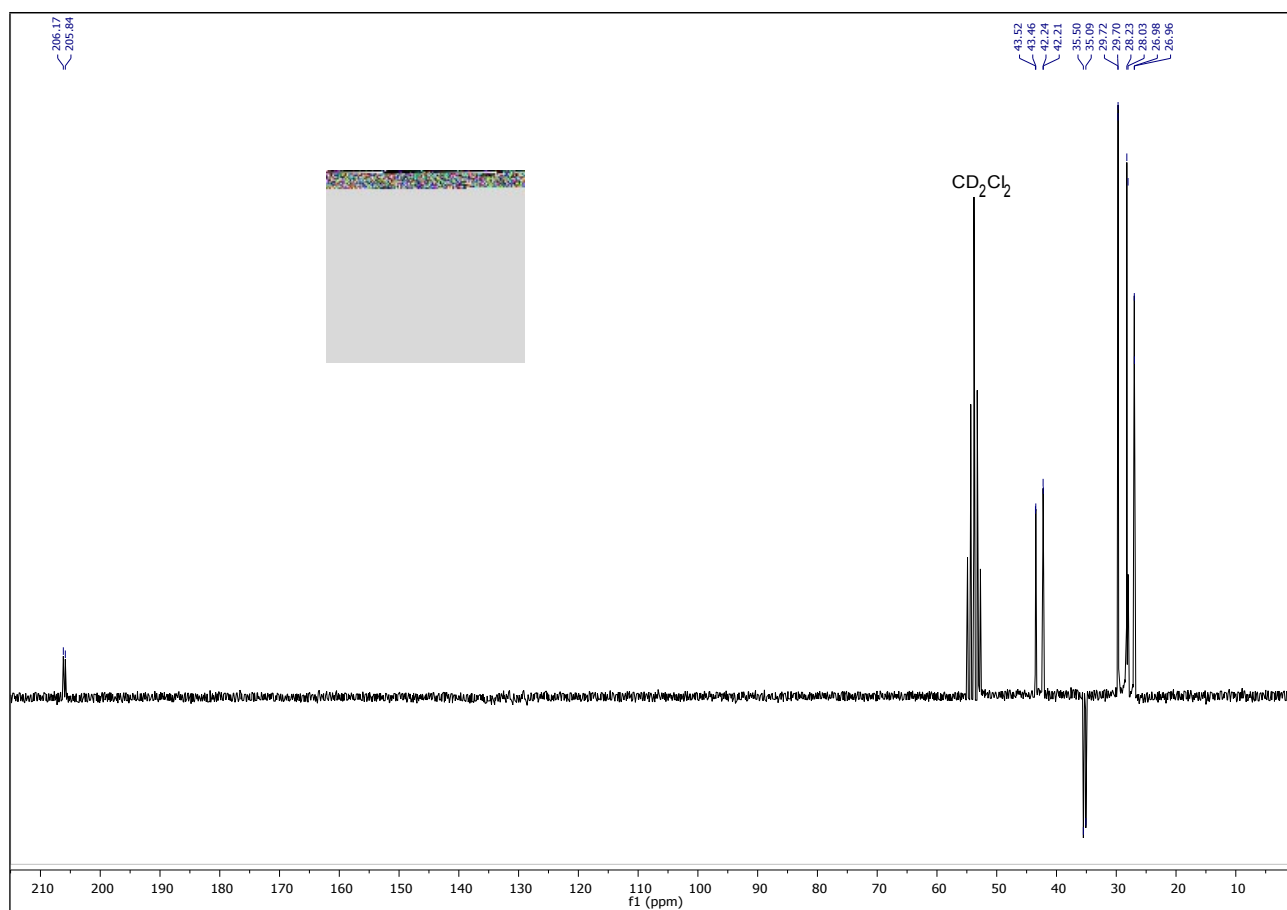

**Figure S3.**  $^{13}\text{C}\{^1\text{H}\}$  PENDANT NMR spectrum (50.3 MHz) of *trans*-[RuCl<sub>2</sub>(CO)(PCy<sub>3</sub>)(en)] (**1**) in CD<sub>2</sub>Cl<sub>2</sub> at 20 °C.



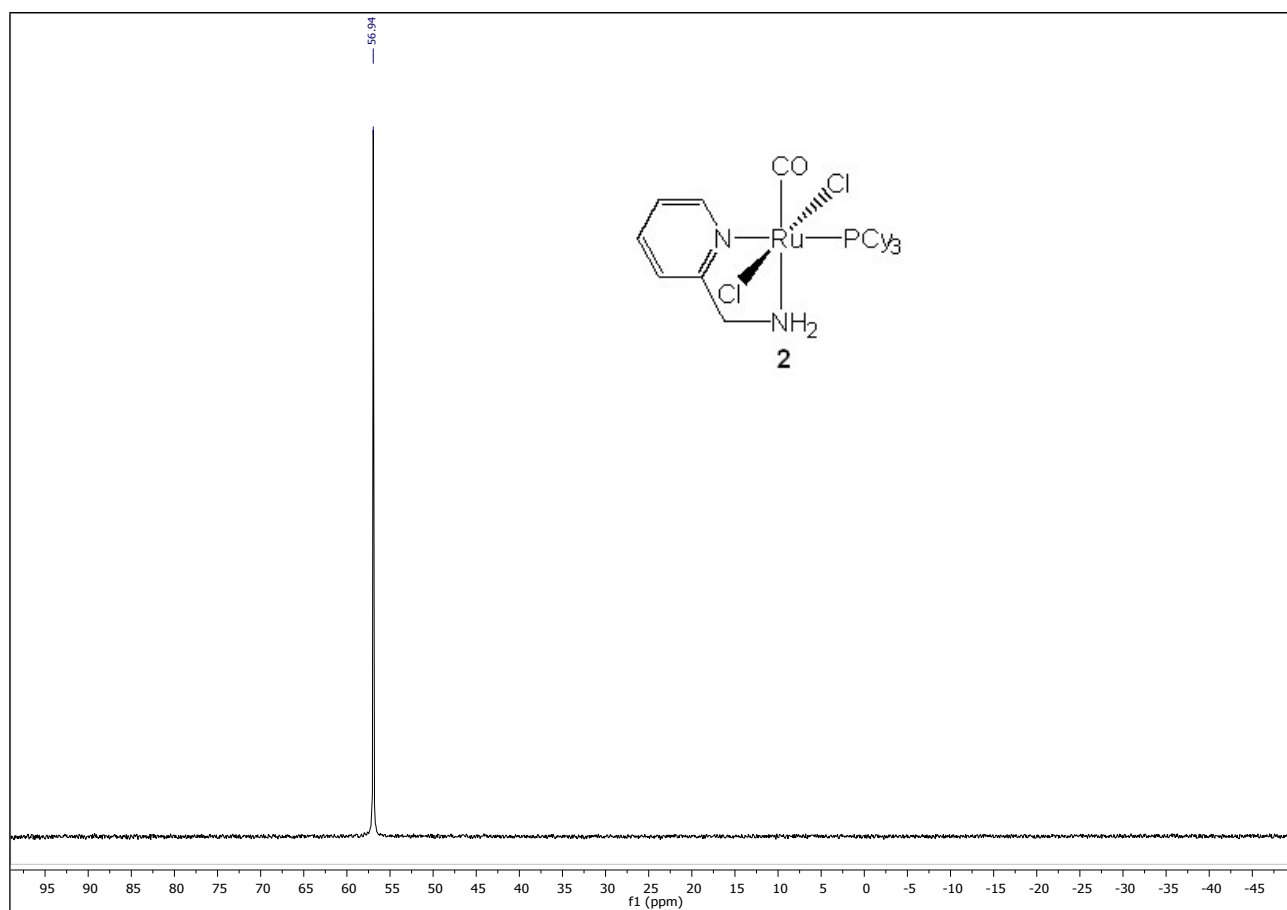

**Figure S4.**  $^{31}\text{P}\{^1\text{H}\}$  NMR spectrum (81.0 MHz) of *trans*-[RuCl<sub>2</sub>(CO)(PCy<sub>3</sub>)(ampy)] (**2**) in CD<sub>2</sub>Cl<sub>2</sub> at 20 °C.

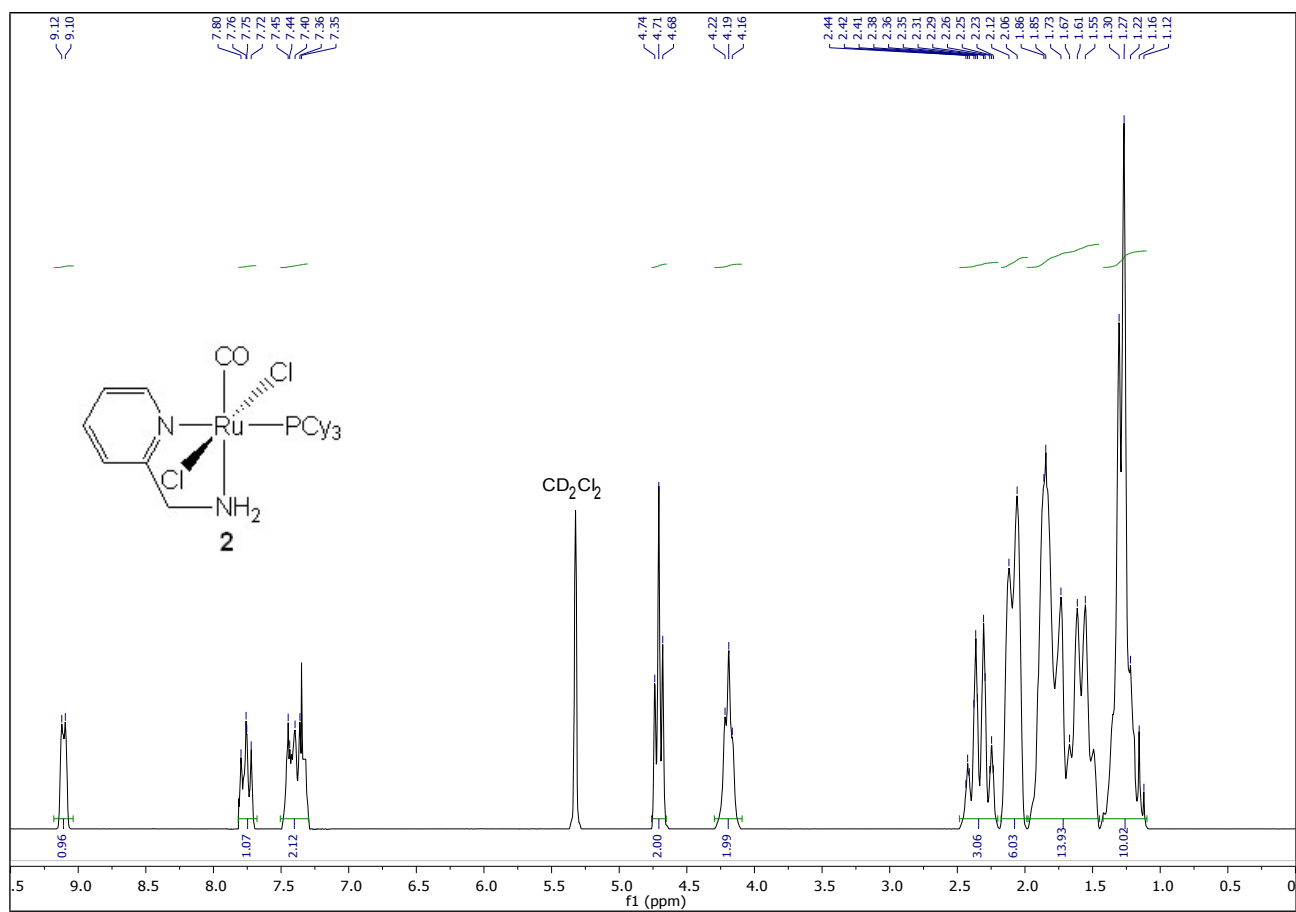

**Figure S5.**  $^1\text{H NMR}$  spectrum (200.1 MHz) of *trans*- $[\text{RuCl}_2(\text{CO})(\text{PCy}_3)(\text{ampy})]$  (**2**) in  $\text{CD}_2\text{Cl}_2$  at 20 °C.

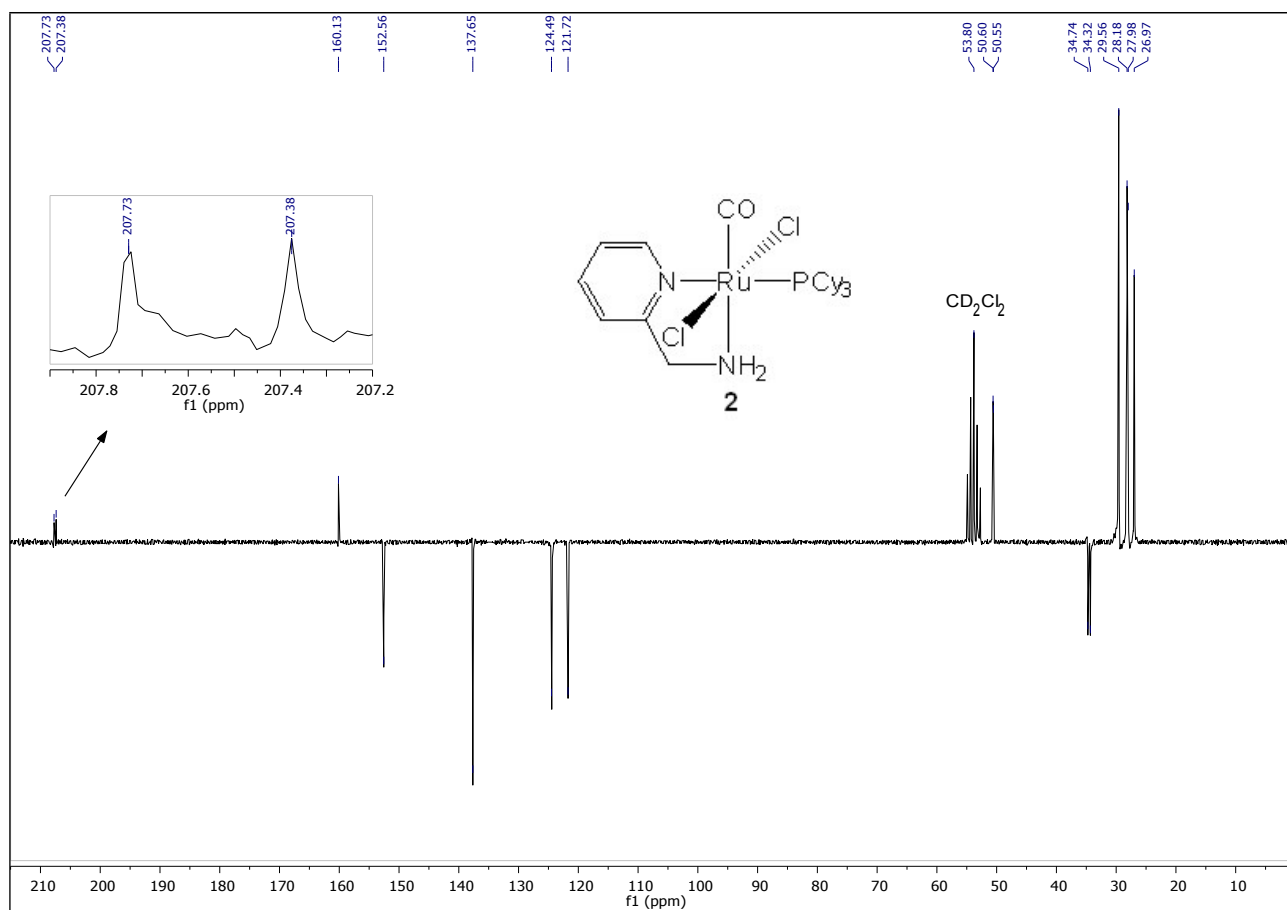

**Figure S6.**  $^{13}\text{C}\{^1\text{H}\}$  PENDANT NMR spectrum (50.3 MHz) of *trans*-[RuCl<sub>2</sub>(CO)(PCy<sub>3</sub>)(ampy)] (**2**) in CD<sub>2</sub>Cl<sub>2</sub> at 20 °C.

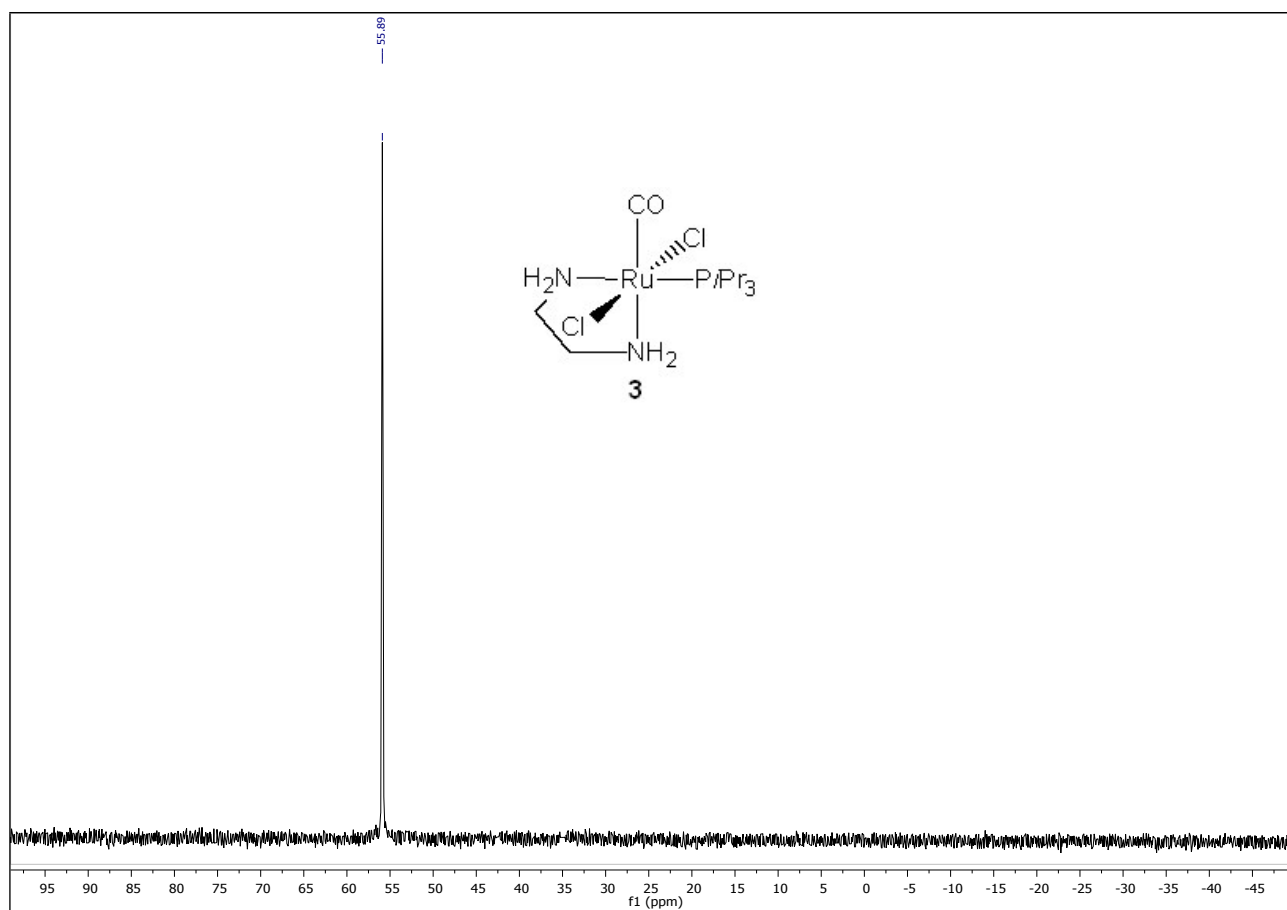

**Figure S7.**  $^{31}\text{P}\{^1\text{H}\}$  NMR spectrum (81.0 MHz) of  $\text{trans-}[\text{RuCl}_2(\text{CO})(\text{PiPr}_3)(\text{en})]$  (**3**) in  $\text{CD}_2\text{Cl}_2$  at 20 °C.

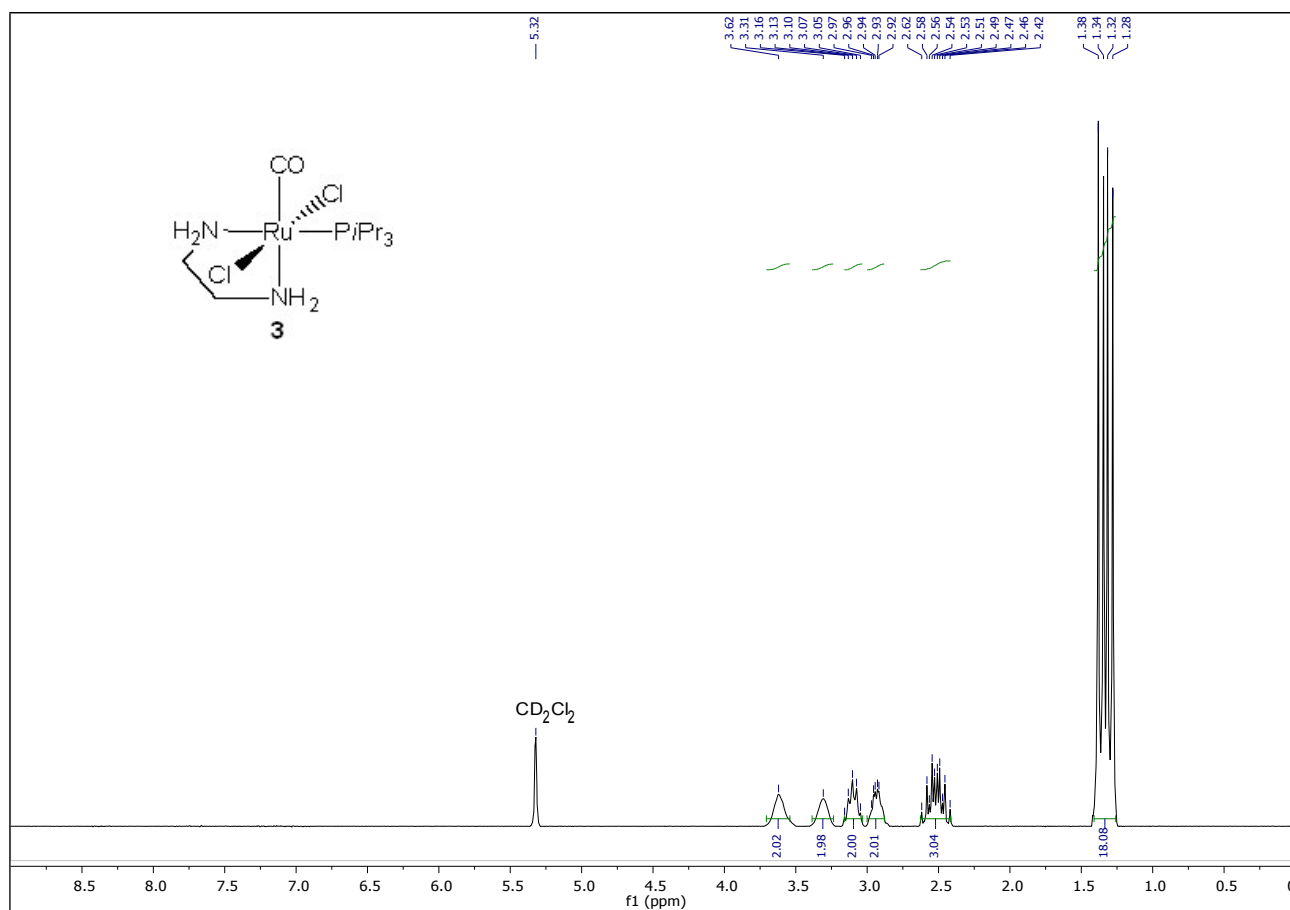

**Figure S8.**  $^1\text{H NMR}$  spectrum (200.1 MHz) of *trans*-[RuCl<sub>2</sub>(CO)(PiPr<sub>3</sub>)(en)] (**3**) in CD<sub>2</sub>Cl<sub>2</sub> at 20 °C.

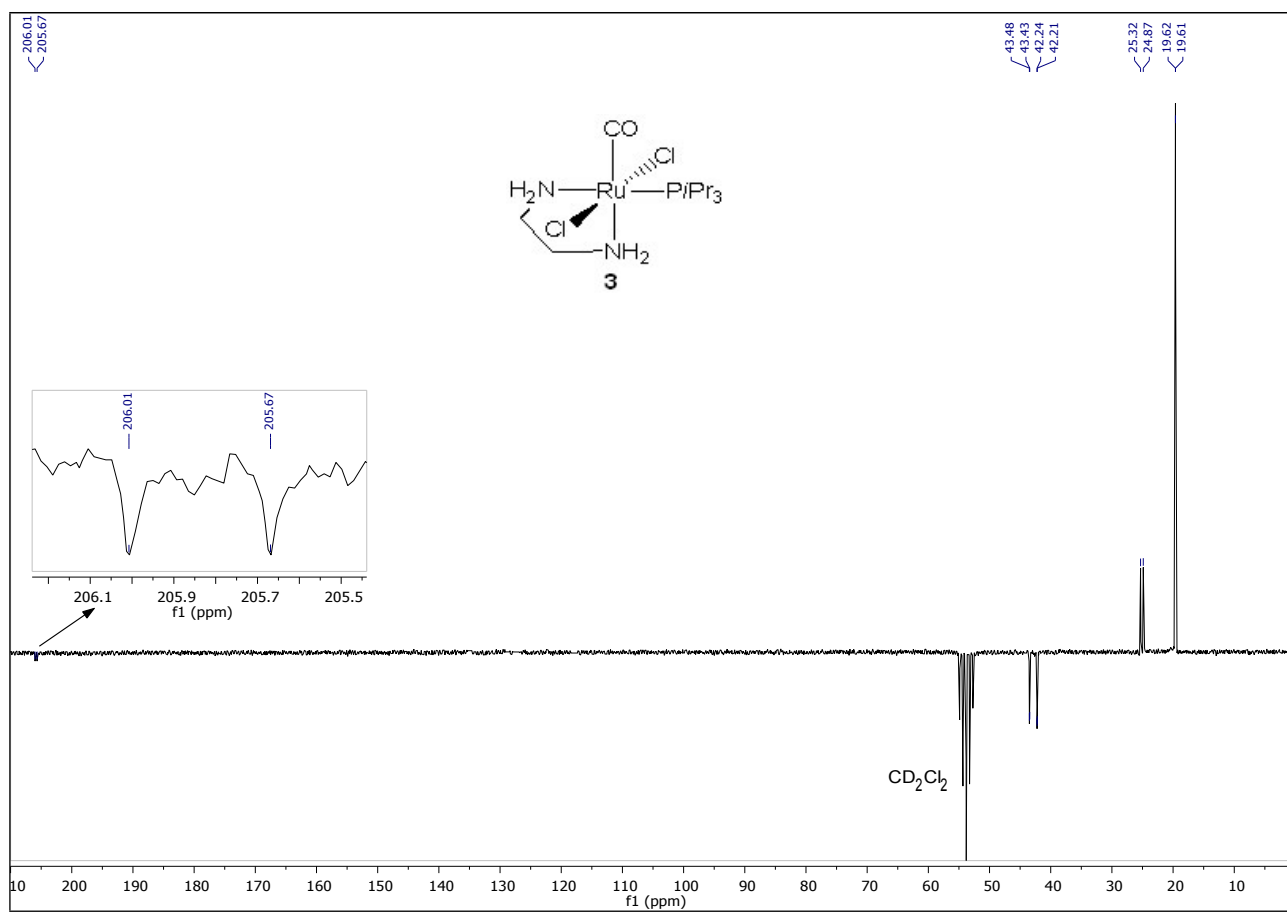

**Figure S9.**  $^{13}\text{C}\{^1\text{H}\}$  PENDANT NMR spectrum (50.3 MHz) of  $\text{trans-}[\text{RuCl}_2(\text{CO})(\text{PiPr}_3)(\text{en})]$  (**3**) in  $\text{CD}_2\text{Cl}_2$  at  $20\text{ }^\circ\text{C}$ .

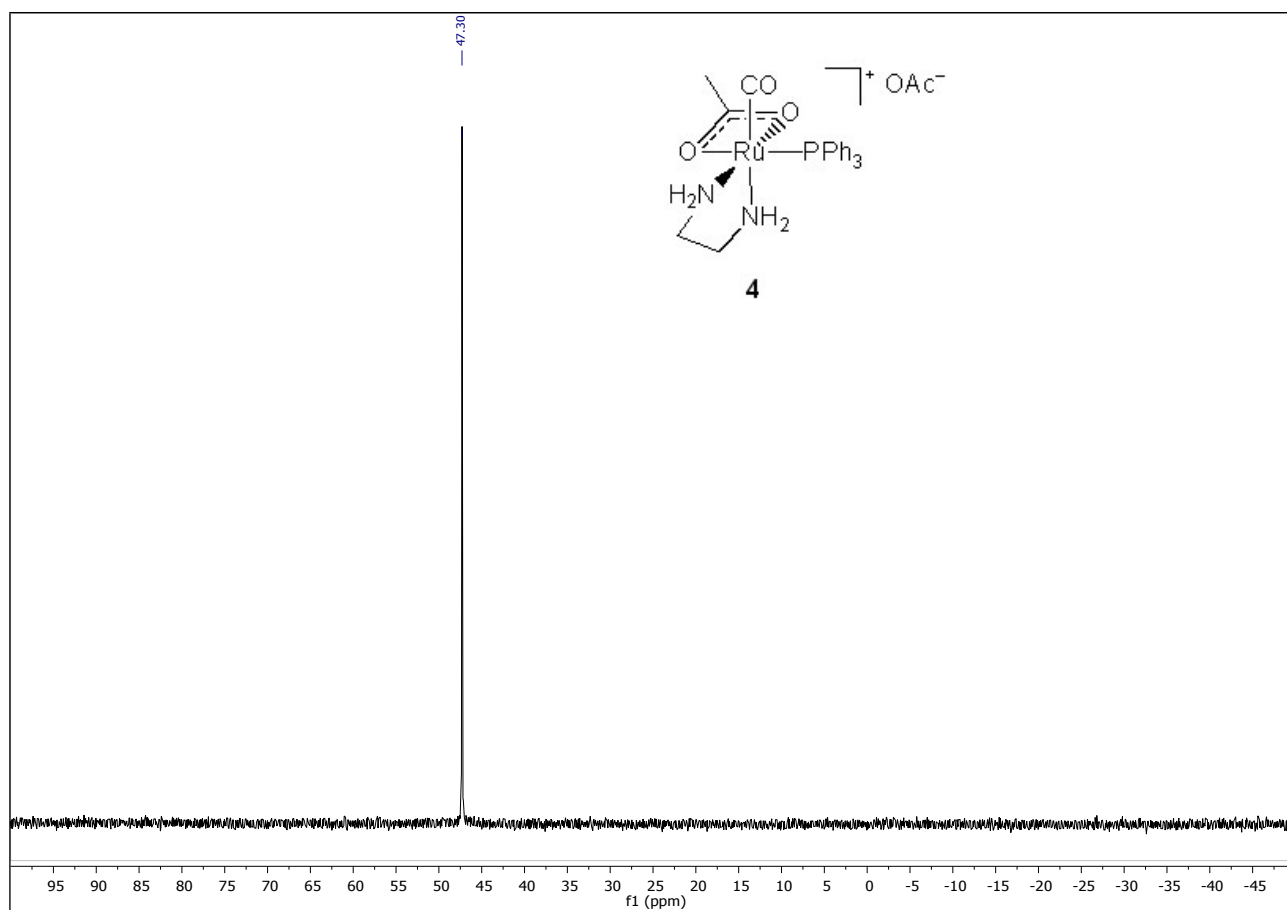

**Figure S10.**  $^{31}\text{P}\{^1\text{H}\}$  NMR spectrum (162.0 MHz) of  $[\text{Ru}(\text{OAc})(\text{CO})(\text{PPh}_3)(\text{en})]\text{OAc}$  (**4**) in  $\text{CD}_2\text{Cl}_2$  at 20 °C.

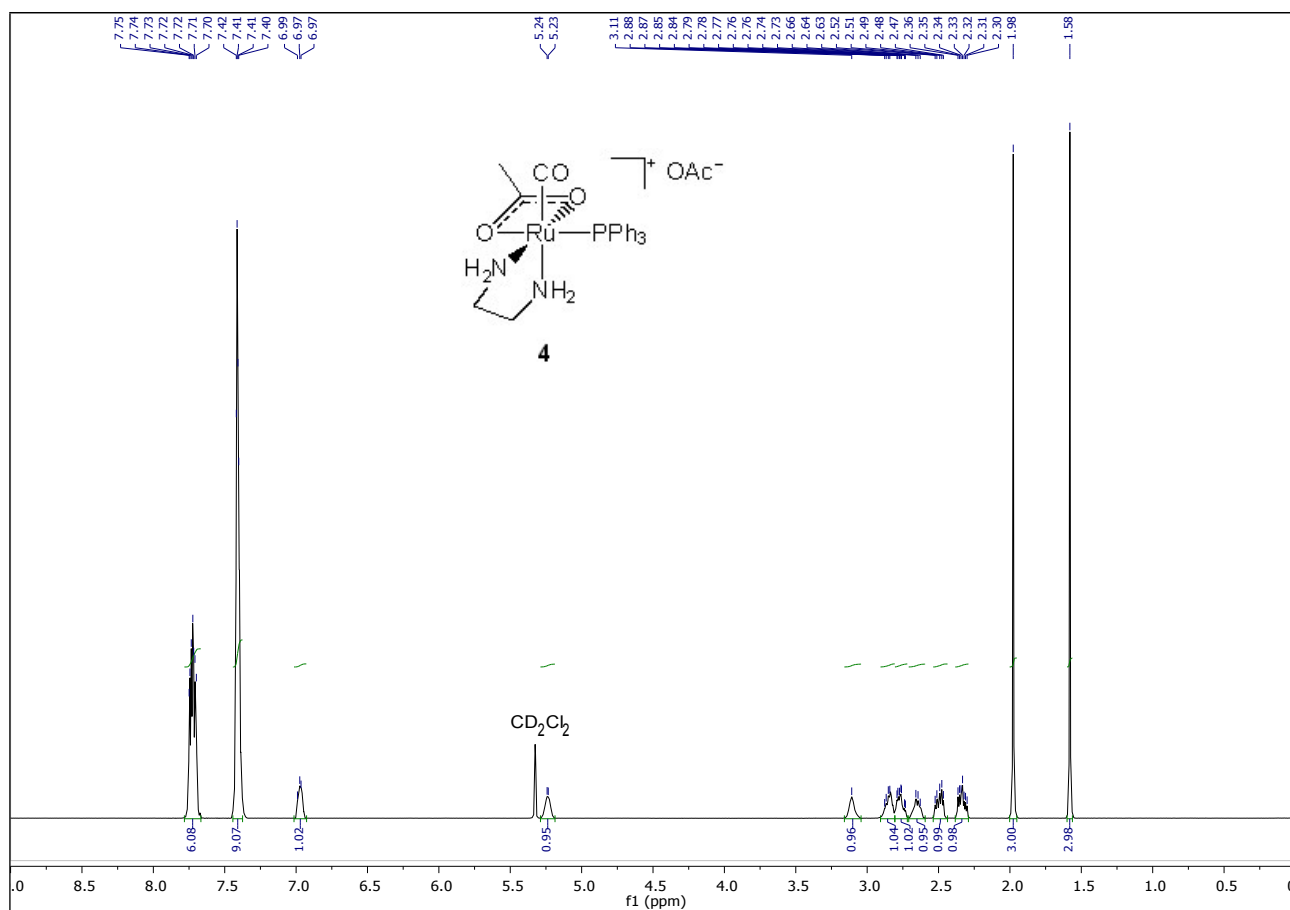

**Figure S11.** <sup>1</sup>H NMR spectrum (400.1 MHz) of [Ru(OAc)(CO)(PPh<sub>3</sub>)(en)]OAc (**4**) in CD<sub>2</sub>Cl<sub>2</sub> at 20 °C.



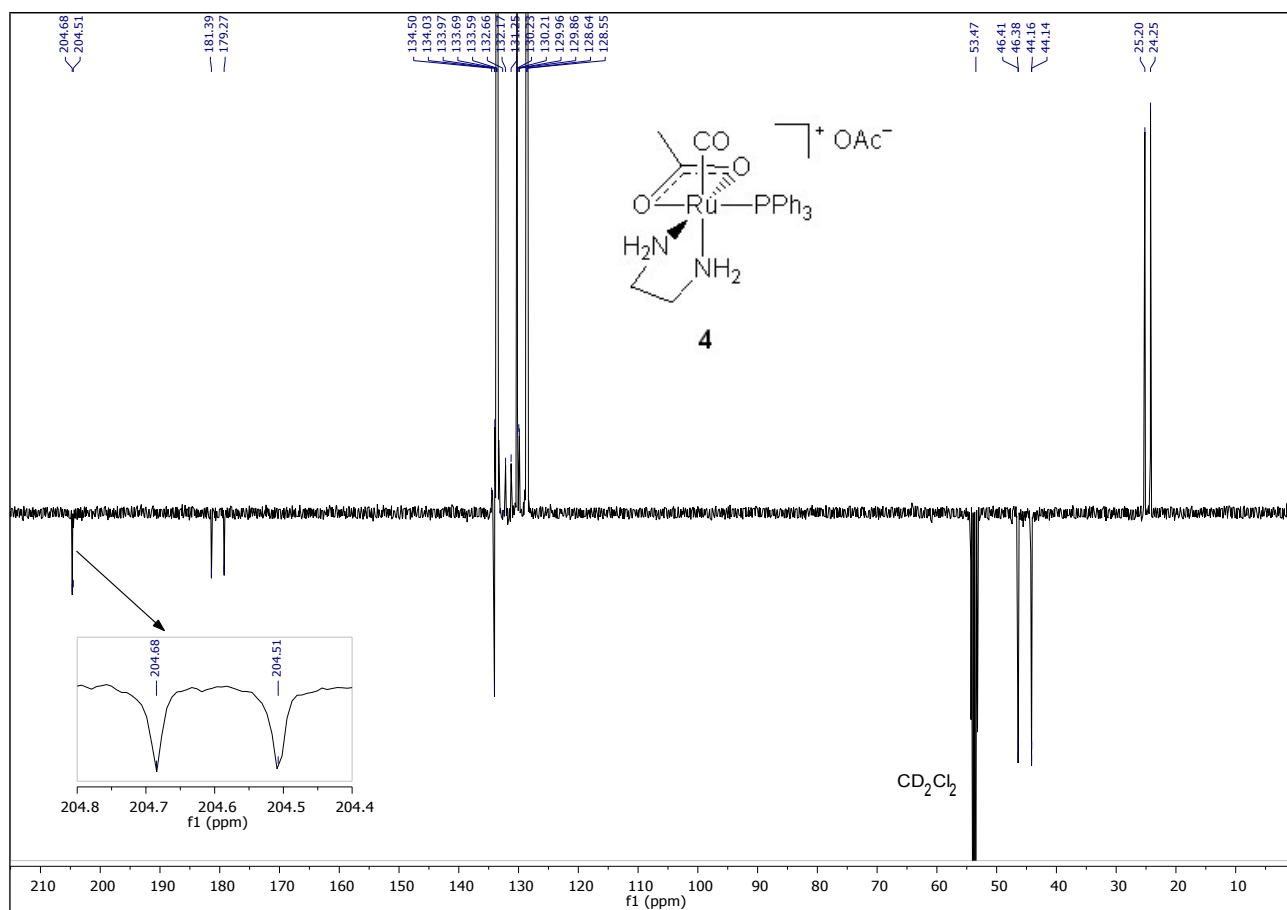

**Figure S12.** <sup>13</sup>C{<sup>1</sup>H} DEPTQ NMR spectrum (100.6 MHz) of [Ru(OAc)(CO)(PPh<sub>3</sub>)(en)]OAc (**4**) in CD<sub>2</sub>Cl<sub>2</sub> at 20 °C.

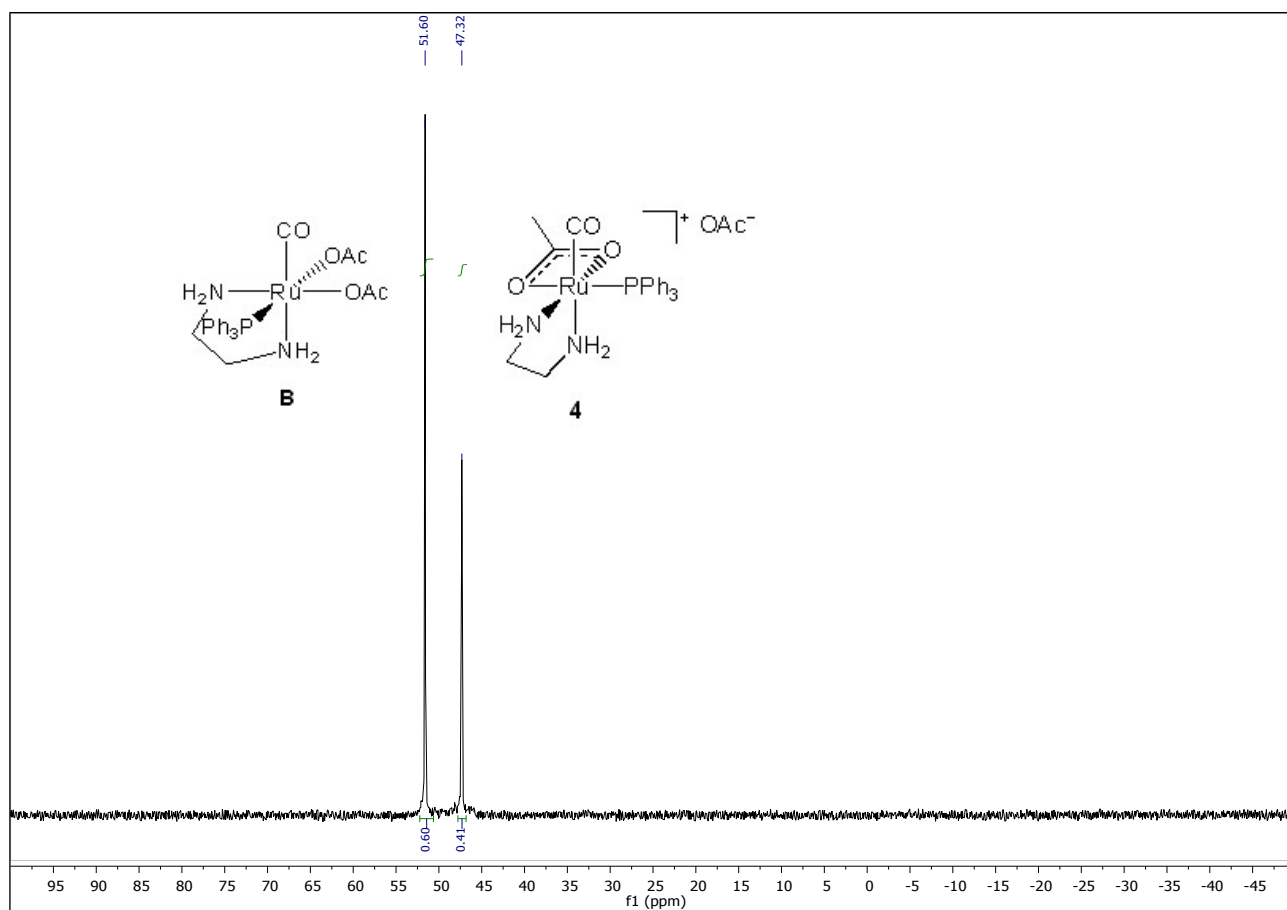

**Figure S13.** Control  $^{31}\text{P}\{^1\text{H}\}$  NMR spectrum (81.0 MHz) of the mixture of  $[\text{Ru}(\text{OAc})(\text{CO})(\text{PPh}_3)(\text{en})]\text{OAc}$  (**4**) and  $\text{trans-}[\text{Ru}(\text{OAc})_2(\text{CO})(\text{PPh}_3)(\text{en})]$  (**B**) in  $\text{CD}_2\text{Cl}_2$  at 20 °C.

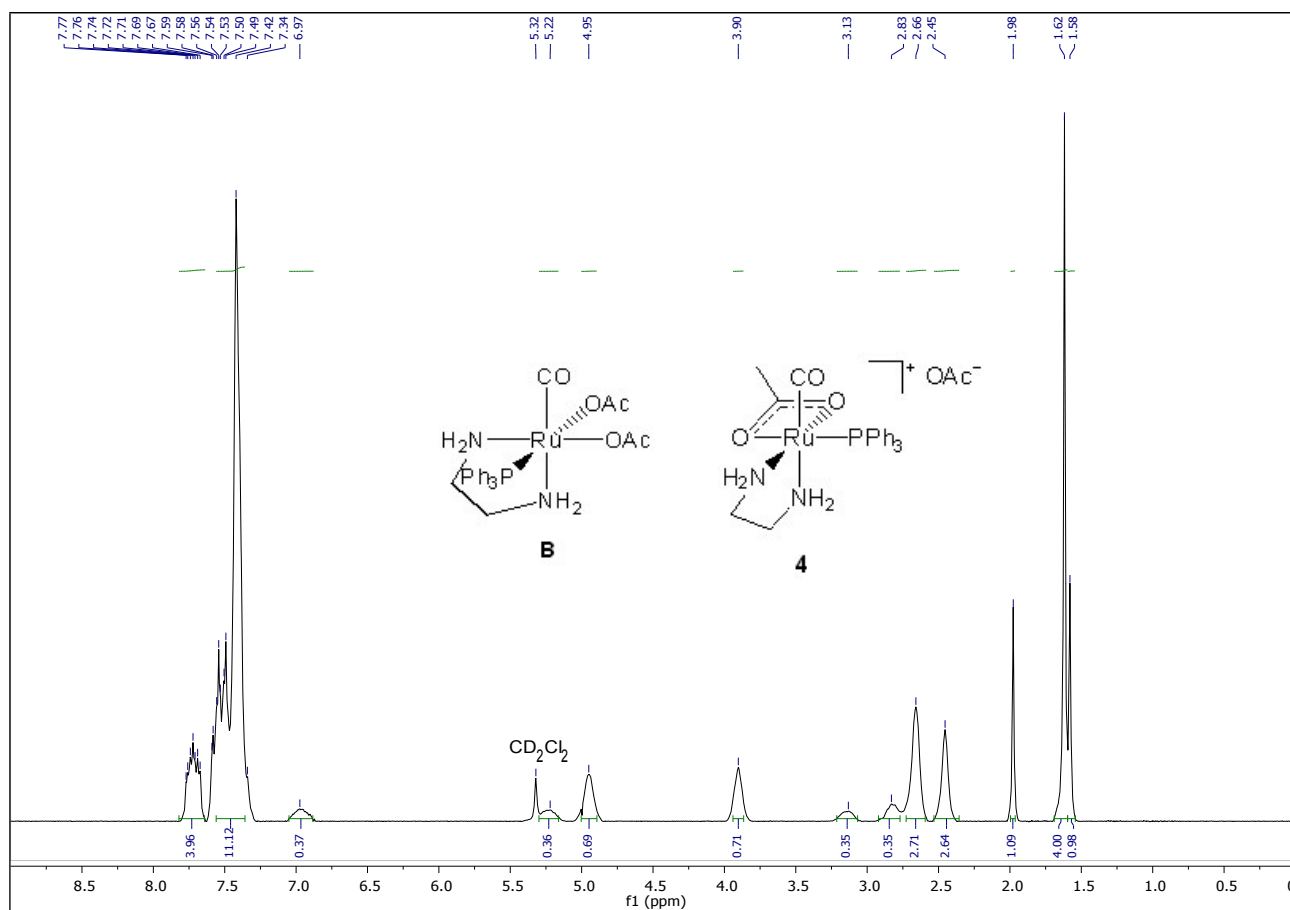

**Figure S14.** Control  $^1\text{H}$  NMR spectrum (200.1 MHz) of the mixture of  $[\text{Ru}(\text{OAc})(\text{CO})(\text{PPh}_3)(\text{en})]\text{OAc}$  (**4**) and  $\text{trans-}[\text{Ru}(\text{OAc})_2(\text{CO})(\text{PPh}_3)(\text{en})]$  (**B**) in  $\text{CD}_2\text{Cl}_2$  at 20 °C.

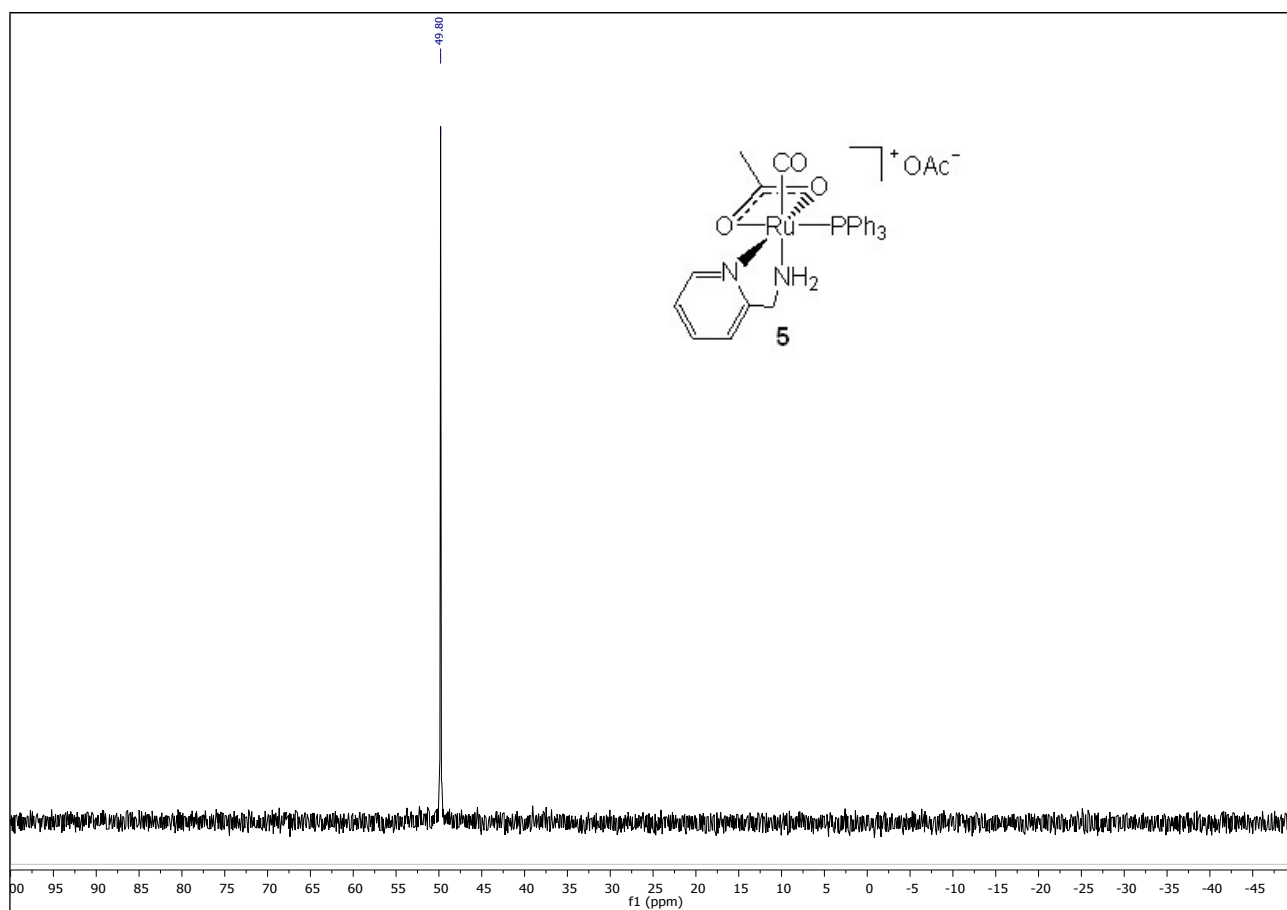

**Figure S15.**  $^{31}\text{P}\{^1\text{H}\}$  NMR spectrum (162.0 MHz) of  $[\text{Ru}(\text{OAc})(\text{CO})(\text{PPh}_3)(\text{ampy})]\text{OAc}$  (**5**) in  $\text{CD}_2\text{Cl}_2$  at 20 °C.

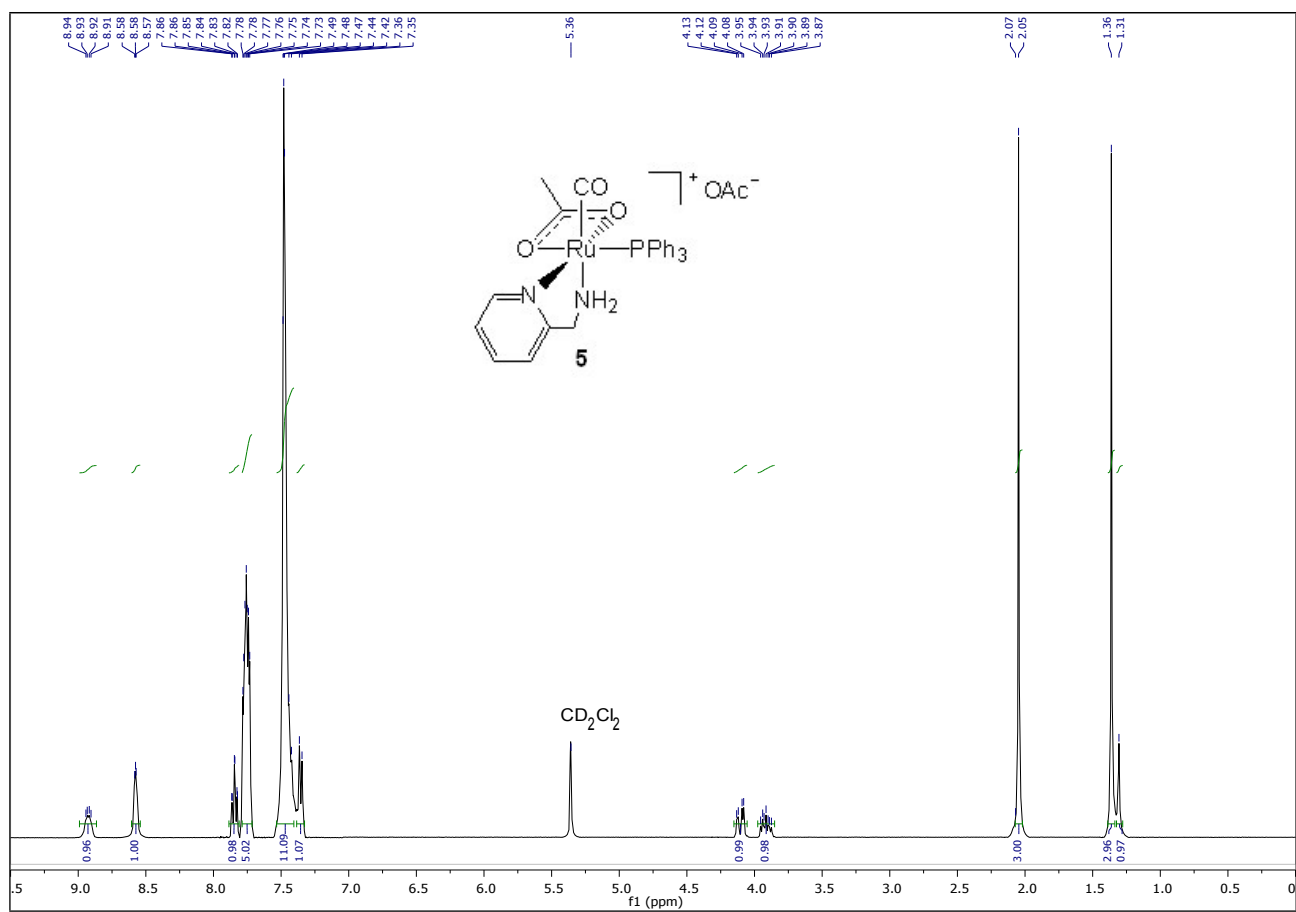

**Figure S16.** <sup>1</sup>H NMR spectrum (400.1 MHz) of [Ru(OAc)(CO)(PPh<sub>3</sub>)(ampy)]OAc (**5**) in CD<sub>2</sub>Cl<sub>2</sub> at 20 °C.

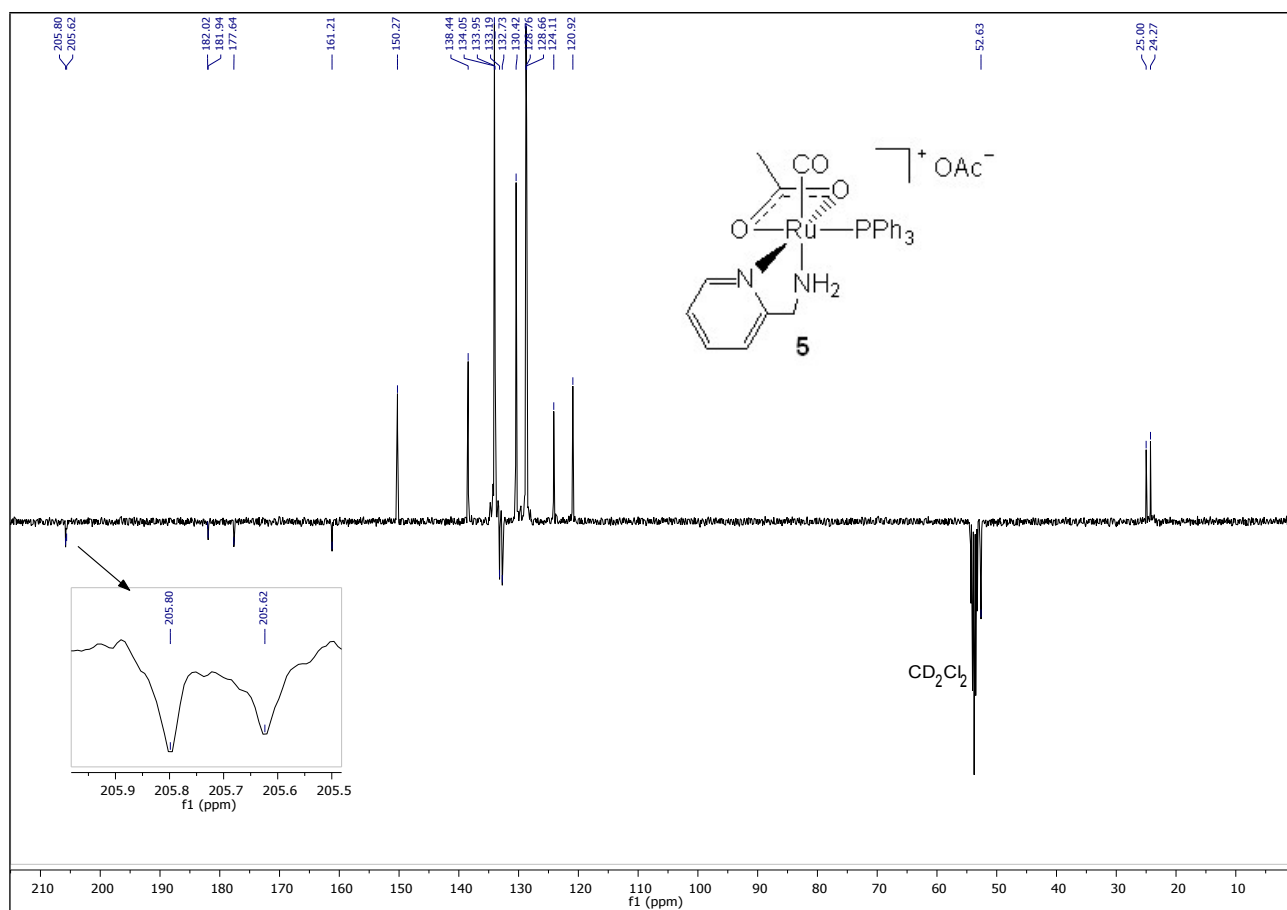

**Figure S17.**  $^{13}\text{C}\{^1\text{H}\}$  DEPTQ NMR spectrum (100.6 MHz) of  $[\text{Ru}(\text{OAc})(\text{CO})(\text{PPh}_3)(\text{ampy})]\text{OAc}$  (**5**) in  $\text{CD}_2\text{Cl}_2$  at  $20\text{ }^\circ\text{C}$ .

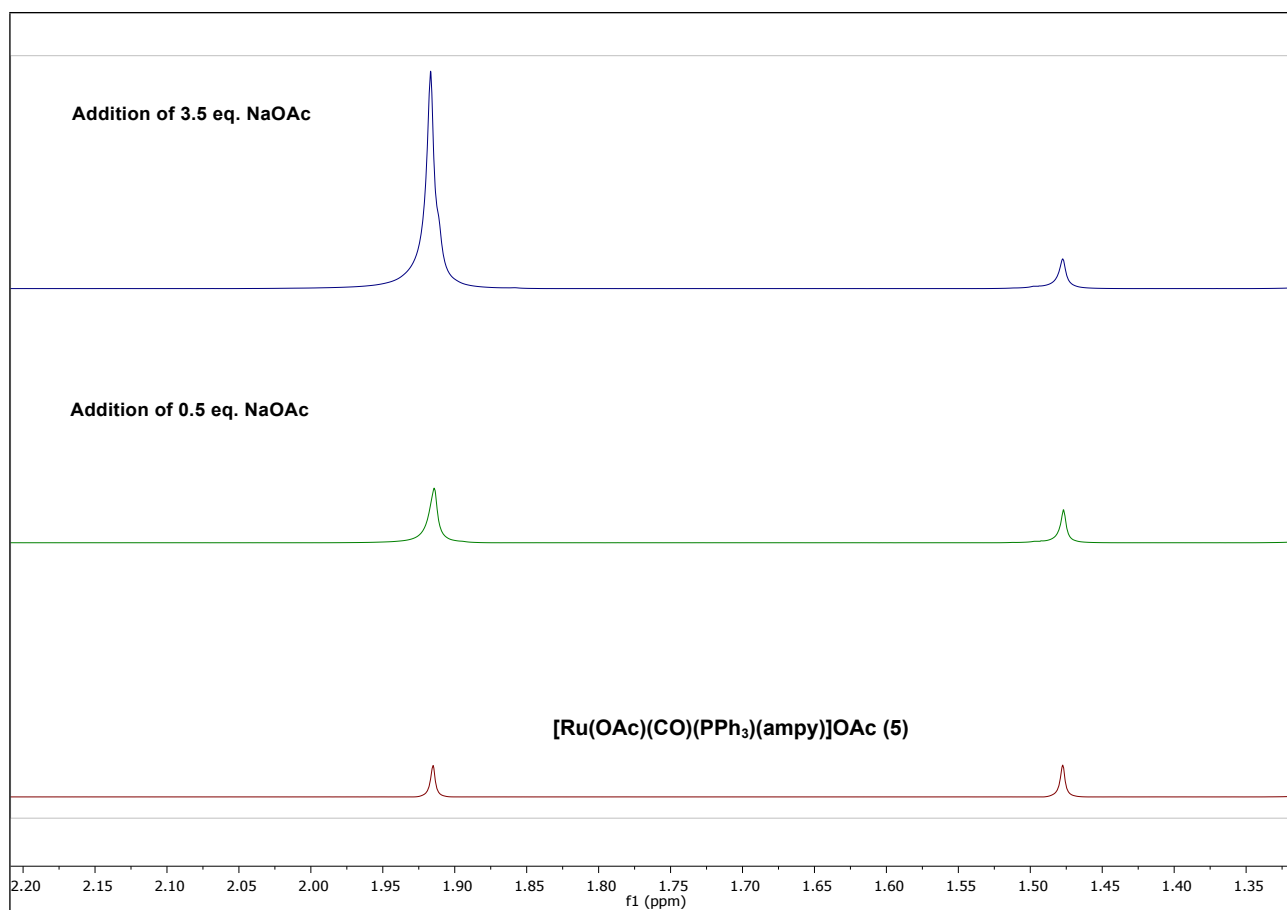

**Figure S18.** Effect of the addition of NaOAc to  $[\text{Ru}(\text{OAc})(\text{CO})(\text{PPh}_3)(\text{ampy})]\text{OAc}$  (**5**) in the methyl acetate region of the  $^1\text{H}$  NMR spectra in  $\text{CD}_3\text{OD}$  at 20 °C.

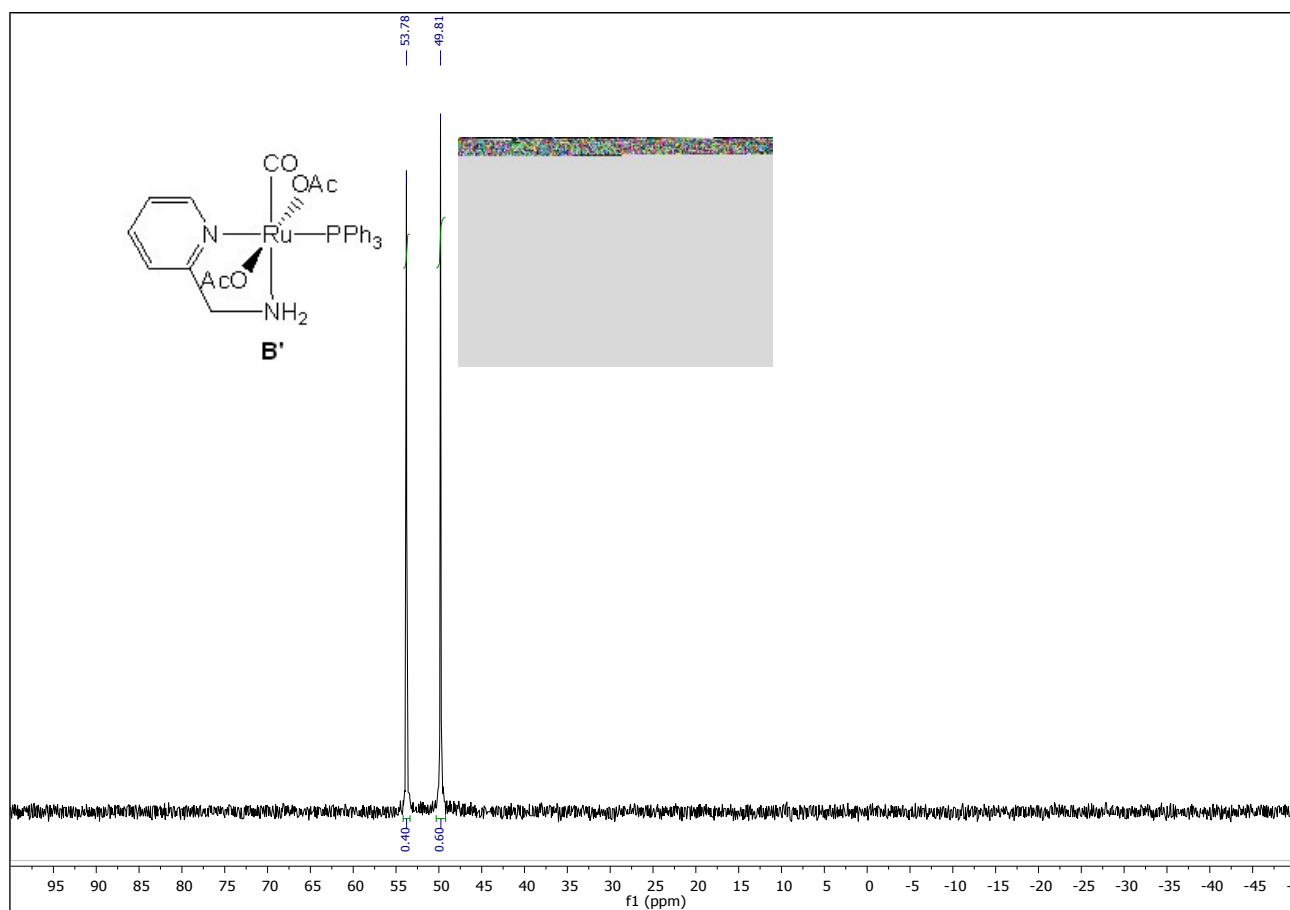

**Figure S19.** Control  $^{31}\text{P}\{^1\text{H}\}$  NMR spectrum (81.0 MHz) of the mixture of  $[\text{Ru}(\text{OAc})(\text{CO})(\text{PPh}_3)(\text{ampy})]\text{OAc}$  (**5**) and *trans*- $[\text{Ru}(\text{OAc})_2(\text{CO})(\text{PPh}_3)(\text{ampy})]$  (**B'**) in  $\text{CD}_2\text{Cl}_2$  at 20 °C.



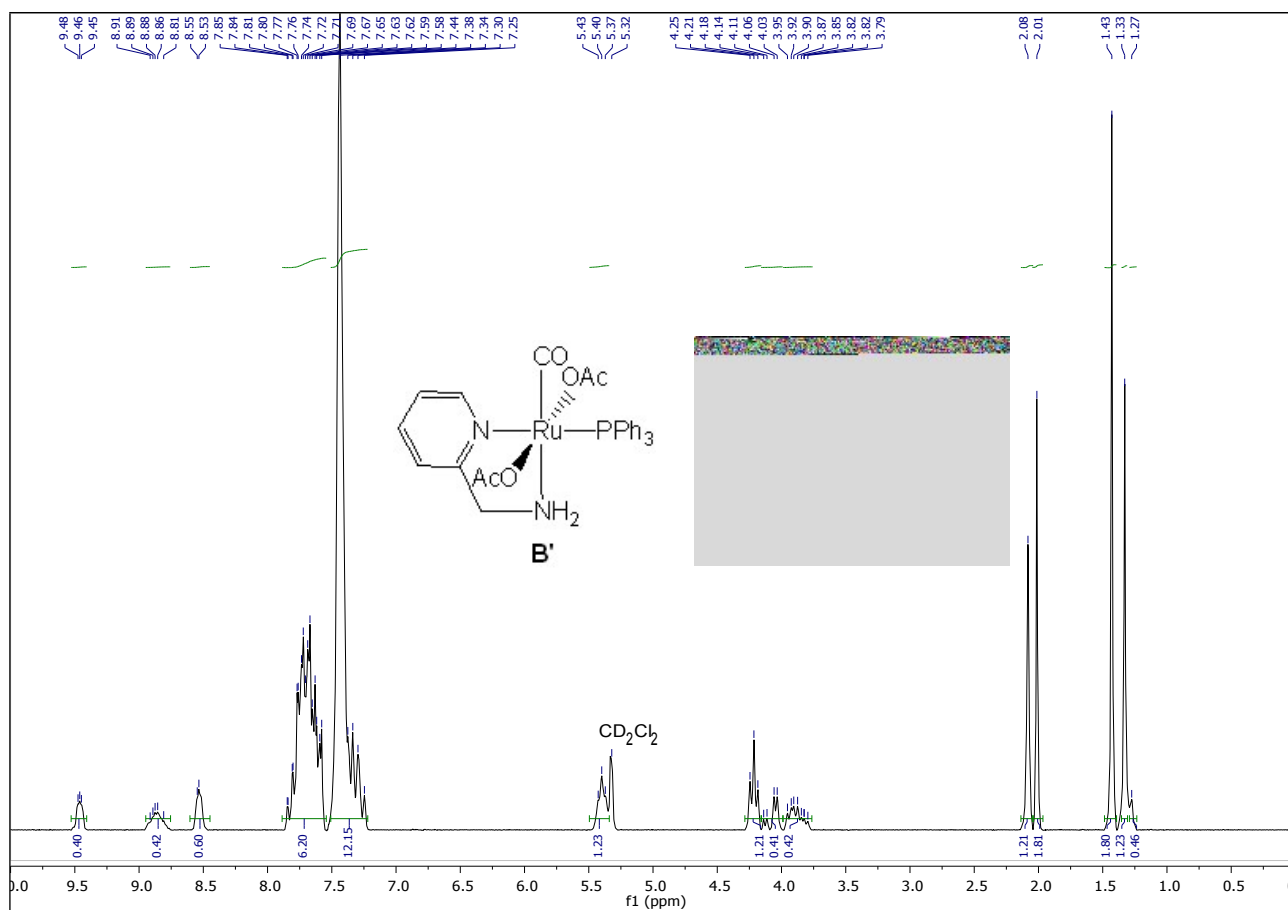

**Figure S20.** Control  $^1\text{H}$  NMR spectrum (200.1 MHz) of the mixture of  $[\text{Ru}(\text{OAc})(\text{CO})(\text{PPh}_3)(\text{ampy})]\text{OAc}$  (**5**) and *trans*- $[\text{Ru}(\text{OAc})_2(\text{CO})(\text{PPh}_3)(\text{ampy})]$  (**B'**) in  $\text{CD}_2\text{Cl}_2$  at  $20^\circ\text{C}$ .

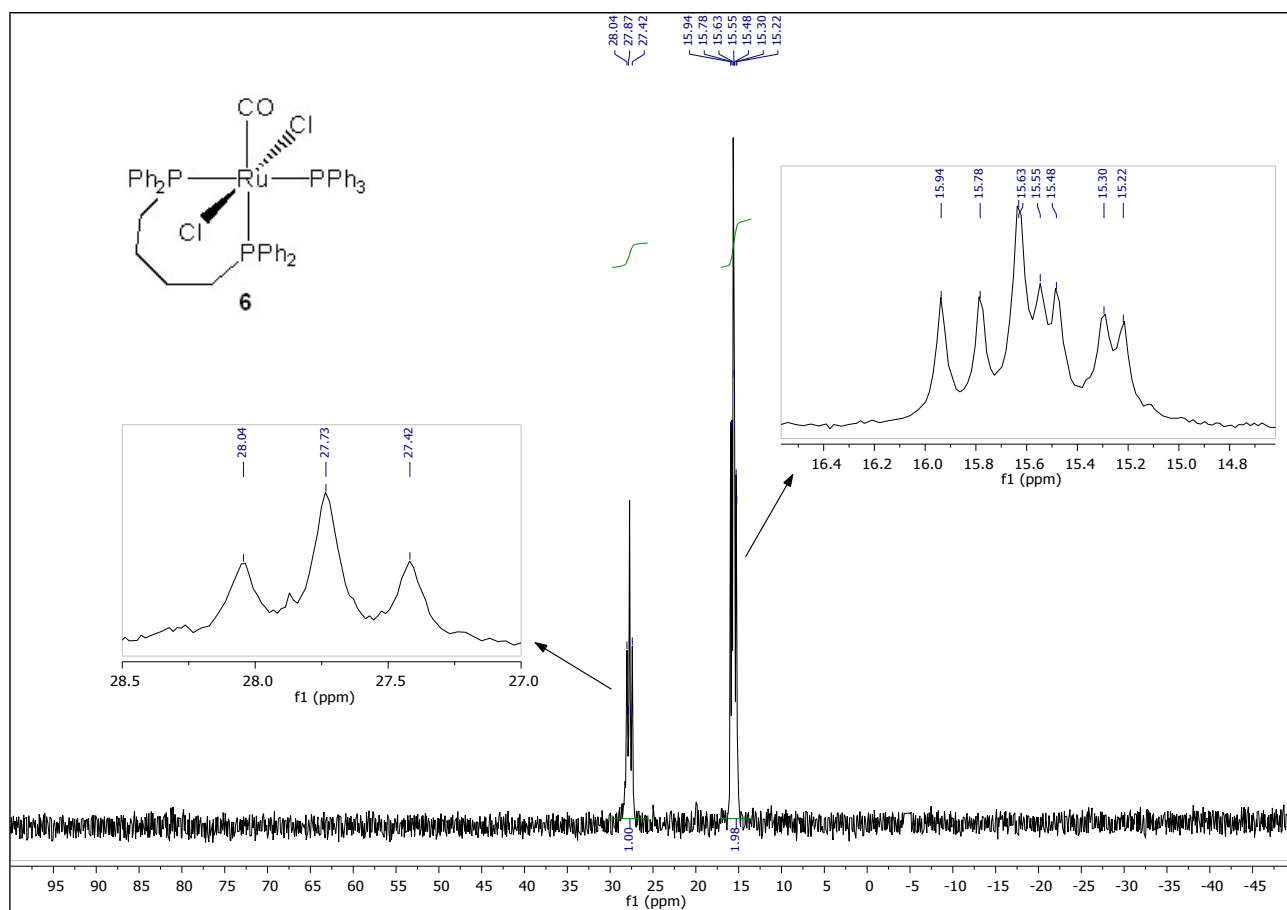

**Figure S21.**  $^{31}\text{P}\{^1\text{H}\}$  NMR spectrum (81.0 MHz) of *trans*-[RuCl<sub>2</sub>(CO)(dppb)(PPh<sub>3</sub>)] (6) in CD<sub>2</sub>Cl<sub>2</sub> at 20 °C.

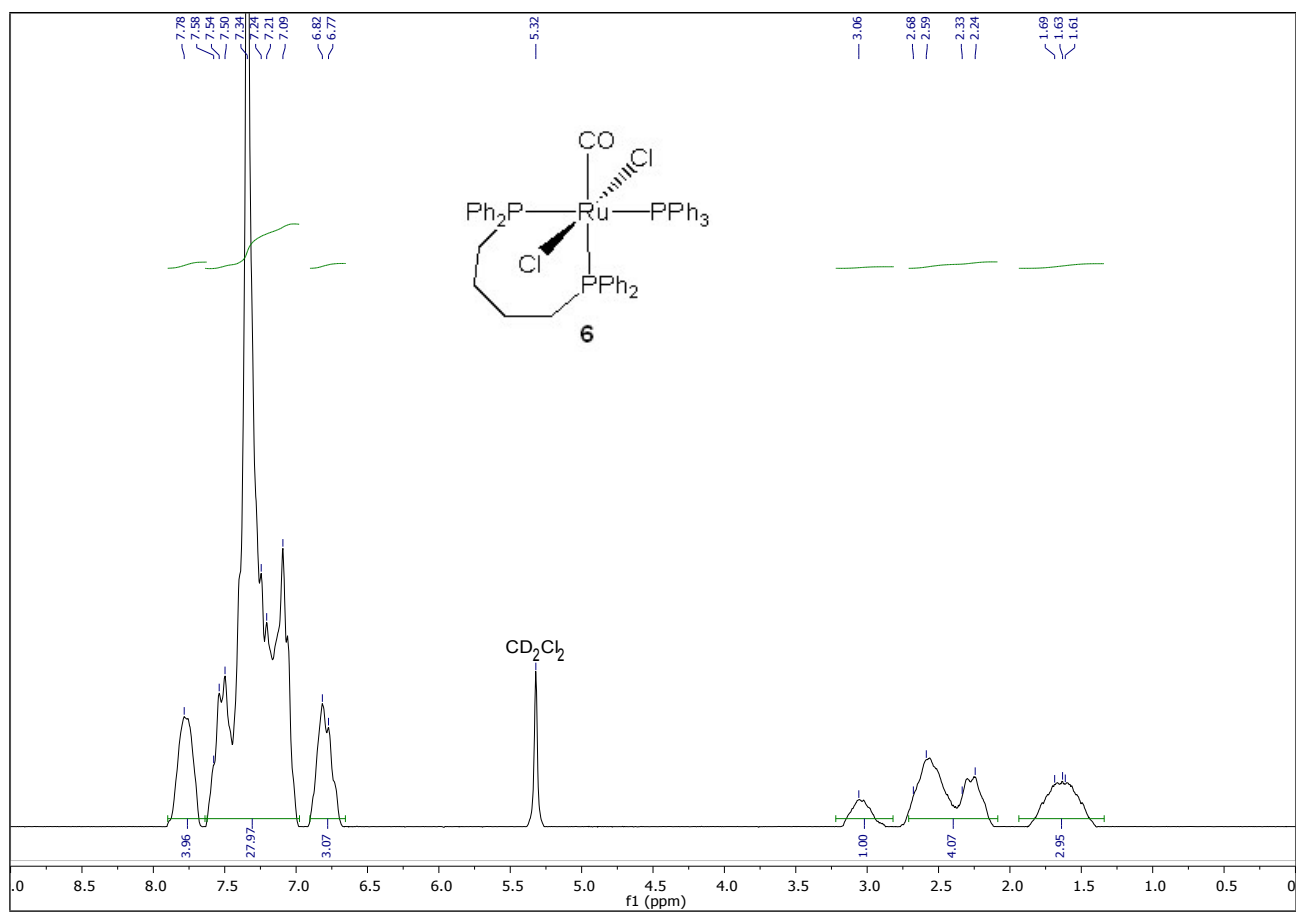

**Figure S22.**  $^1\text{H NMR}$  spectrum (200.1 MHz) of *trans*- $[\text{RuCl}_2(\text{CO})(\text{dppb})(\text{PPh}_3)]$  (**6**) in  $\text{CD}_2\text{Cl}_2$  at 20 °C.

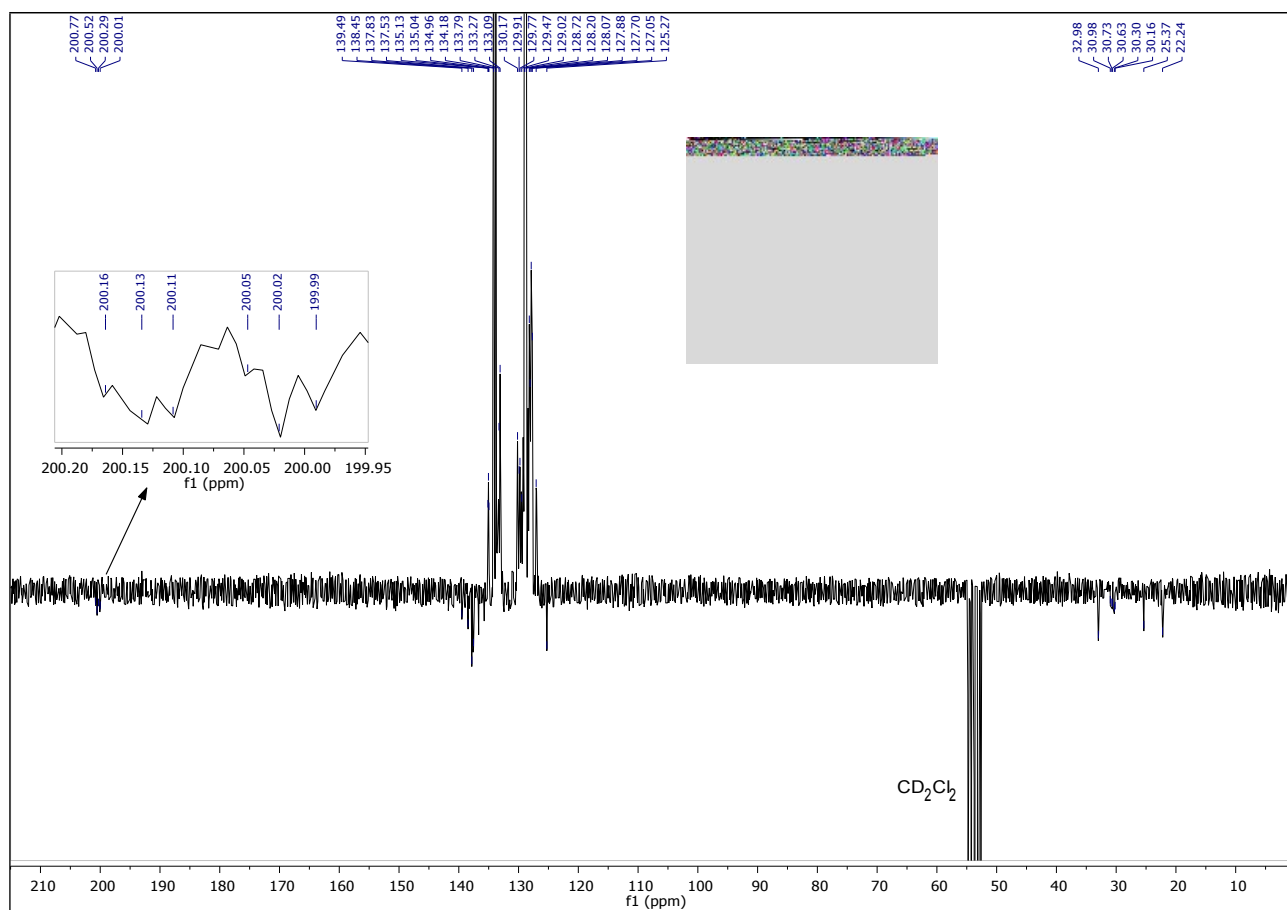

**Figure S23.**  $^{13}\text{C}\{^1\text{H}\}$  DEPTQ NMR spectrum (100.6 MHz) of *trans*-[RuCl<sub>2</sub>(CO)(dppb)(PPh<sub>3</sub>)] (6) in CD<sub>2</sub>Cl<sub>2</sub> at 20 °C.

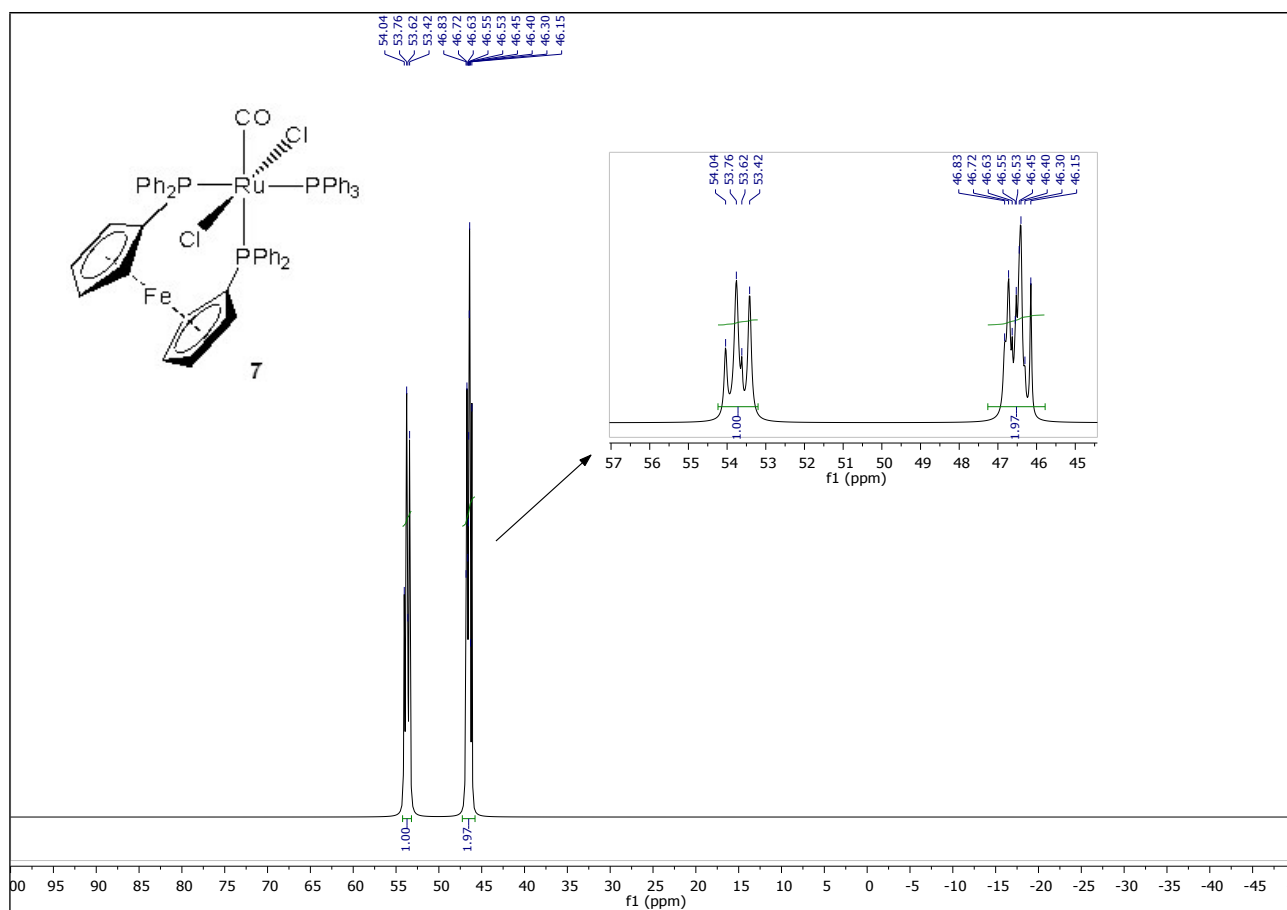

**Figure S24.**  $^{31}\text{P}\{^1\text{H}\}$  NMR spectrum (81.0 MHz) of  $\text{trans-}[\text{RuCl}_2(\text{CO})(\text{dppf})(\text{PPh}_3)]$  (7) in  $\text{CD}_2\text{Cl}_2$  at  $20\text{ }^\circ\text{C}$ .

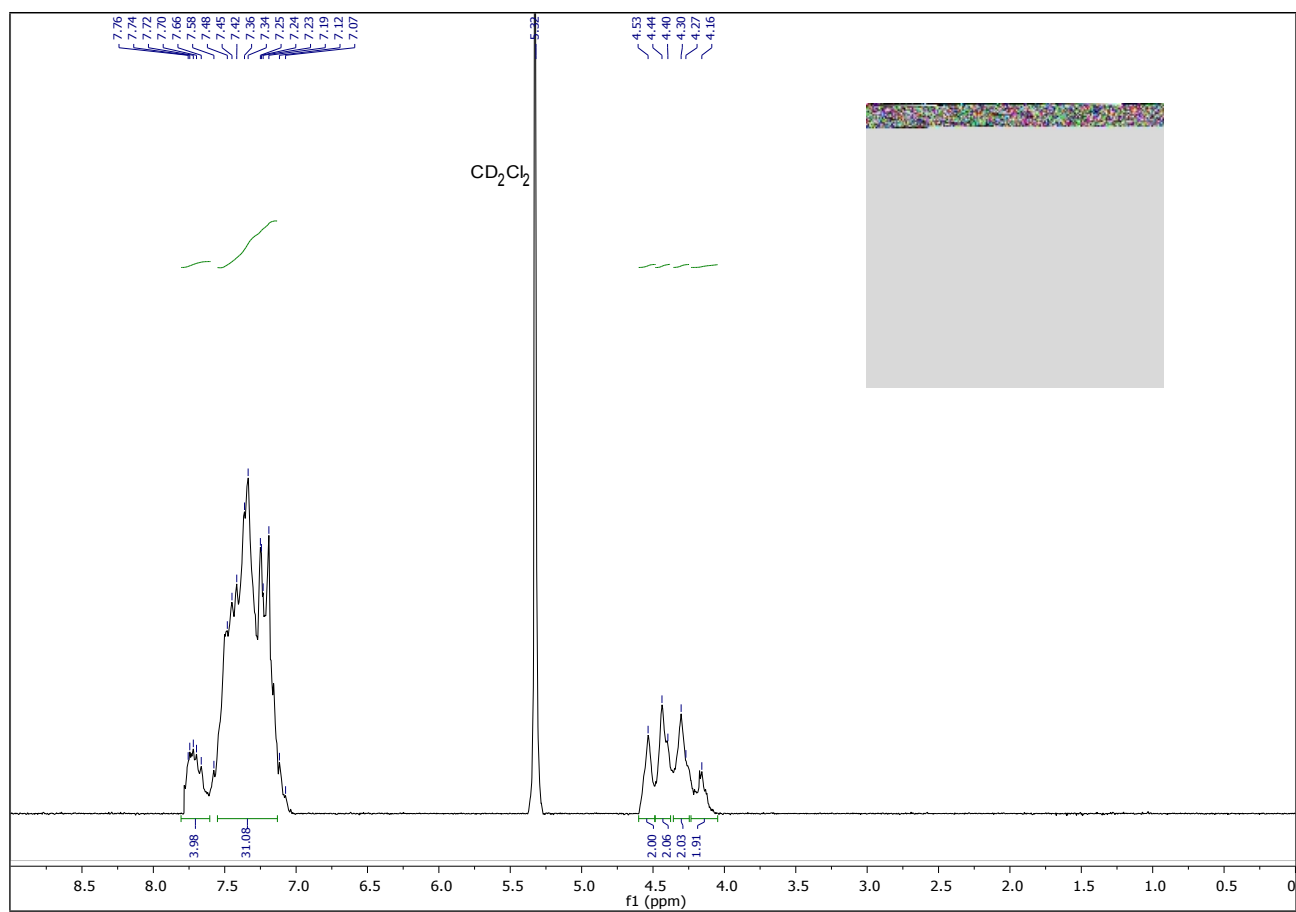

**Figure S25.**  $^1\text{H}$  NMR spectrum (200.1 MHz) of *trans*-[RuCl<sub>2</sub>(CO)(dppf)(PPh<sub>3</sub>)] (7) in CD<sub>2</sub>Cl<sub>2</sub> at 20 °C.

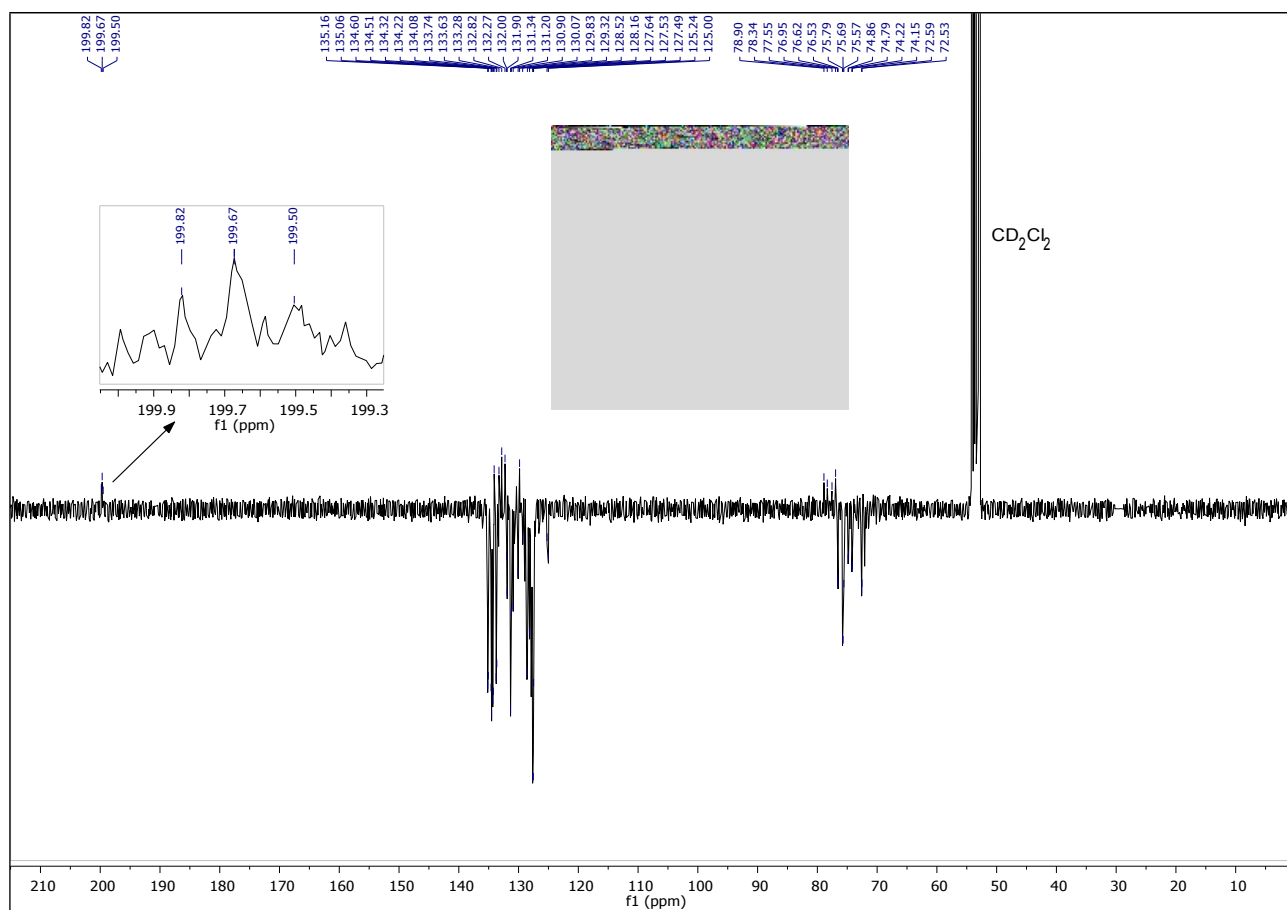

**Figure S26.**  $^{13}\text{C}\{^1\text{H}\}$  DEPTQ NMR spectrum (100.6 MHz) of *trans*-[RuCl<sub>2</sub>(CO)(dppf)(PPh<sub>3</sub>)] (**7**) in CD<sub>2</sub>Cl<sub>2</sub> at 20 °C.

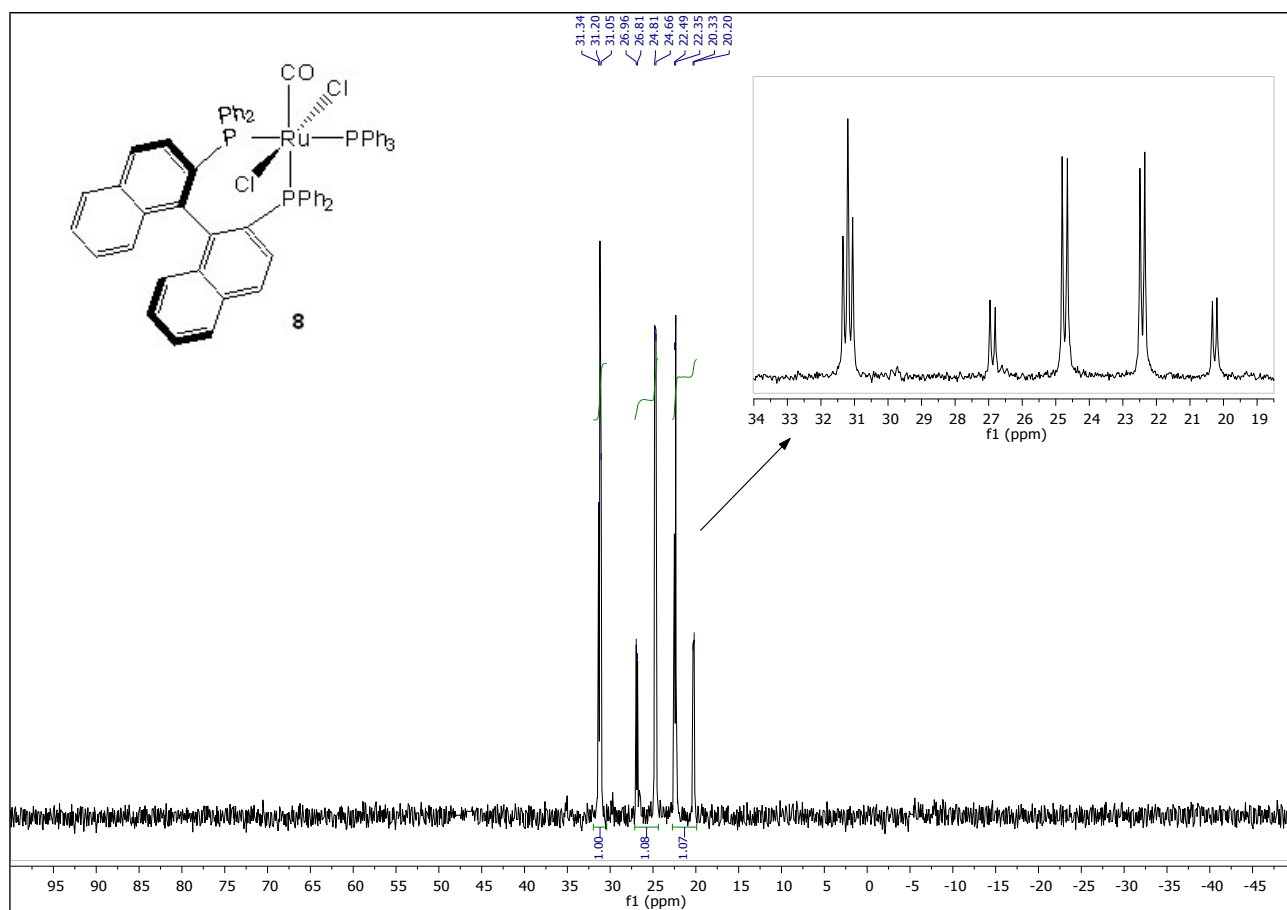

**Figure S27.** <sup>31</sup>P{<sup>1</sup>H} NMR spectrum (162.0 MHz) of *trans*-[RuCl<sub>2</sub>(CO)((*R*)-BINAP)(PPh<sub>3</sub>)] (**8**) in [D<sub>8</sub>]toluene at 20 °C.



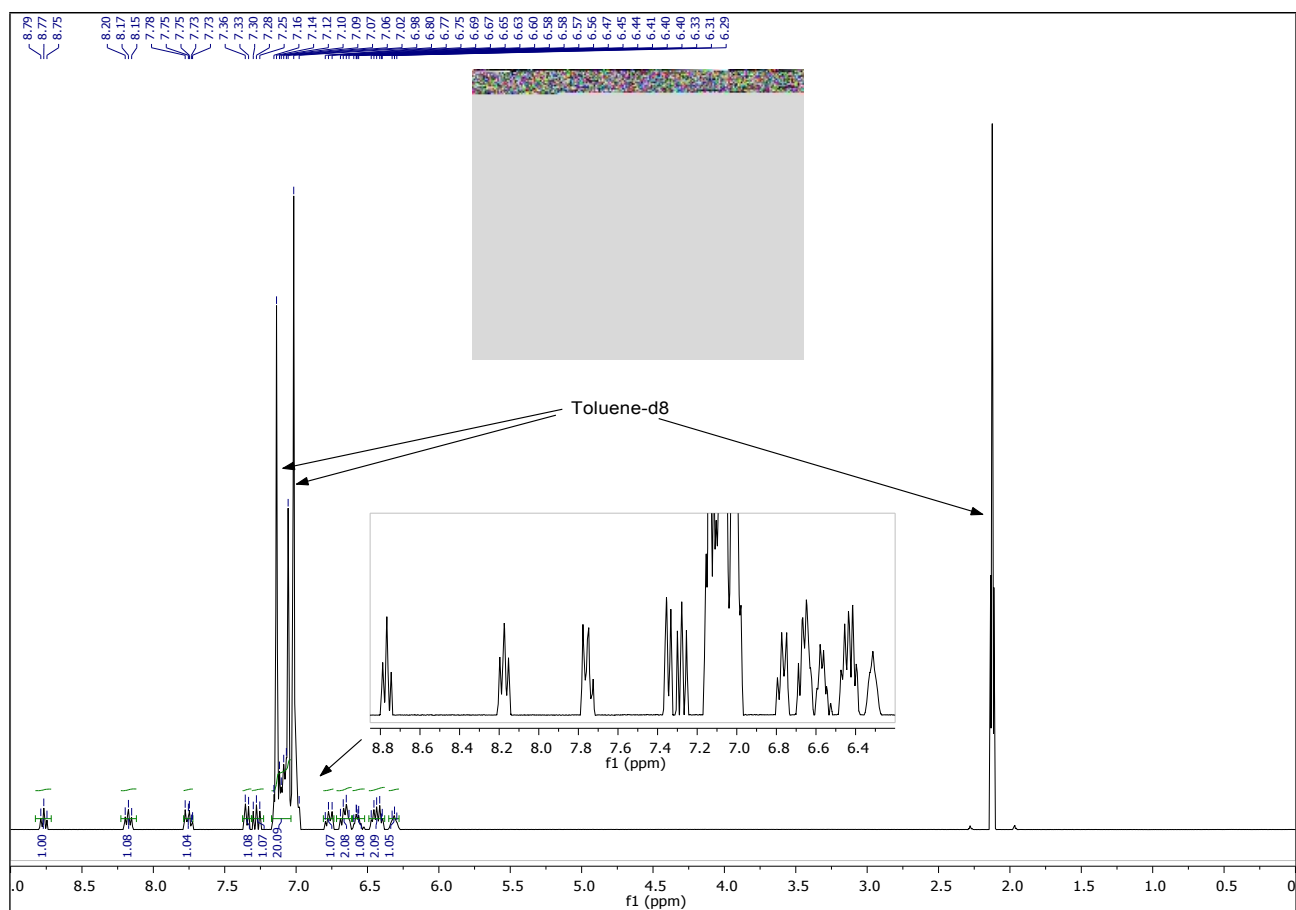

**Figure S28.**  $^1\text{H}$  NMR spectrum (400.1 MHz) of  $\text{trans-}[\text{RuCl}_2(\text{CO})((R)\text{-BINAP})(\text{PPh}_3)]$  (**8**) in  $[\text{D}_8]\text{toluene}$  at  $20\text{ }^\circ\text{C}$ .

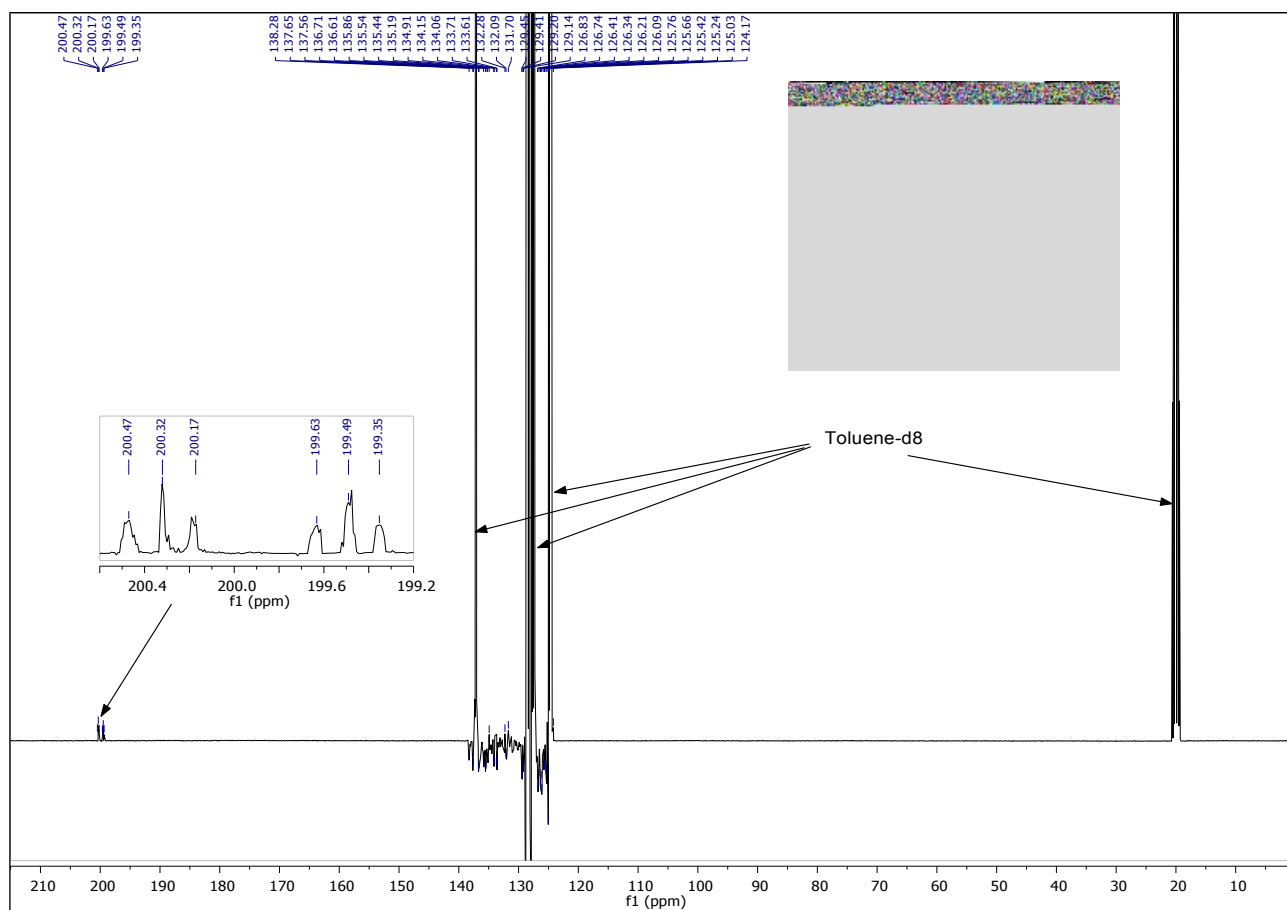

**Figure S29.**  $^{13}\text{C}\{^1\text{H}\}$  DEPTQ NMR spectrum (100.6 MHz) of *trans*-[RuCl<sub>2</sub>(CO)((*R*)-BINAP)(PPh<sub>3</sub>)] (**8**) in [D<sub>8</sub>]toluene at 20 °C.

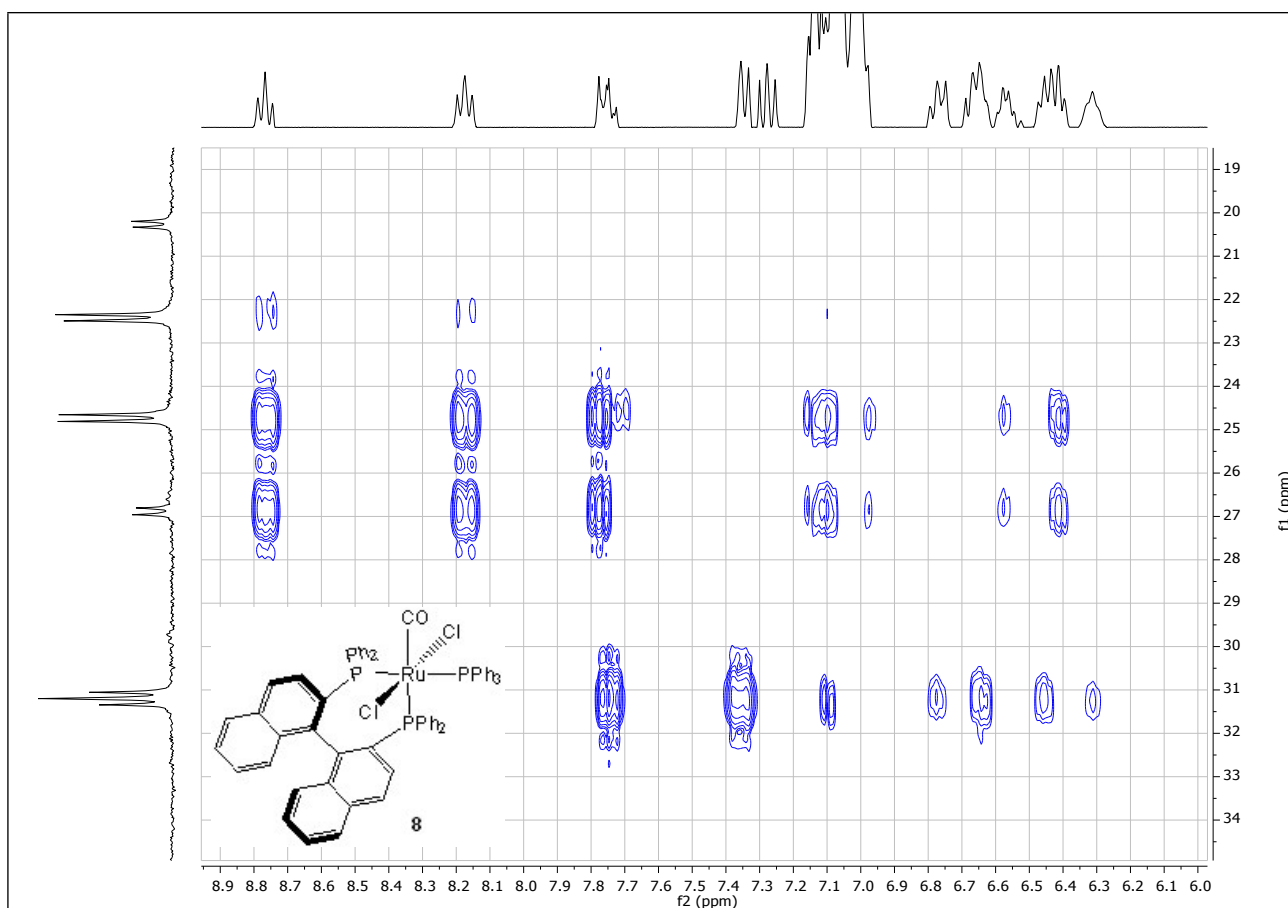

**Figure S30.**  $^{31}\text{P}$ - $^1\text{H}$  HMBC 2D NMR spectrum of *trans*-[RuCl<sub>2</sub>(CO)((*R*)-BINAP)(PPh<sub>3</sub>)] (**8**) in [D<sub>8</sub>]toluene at 20 °C.

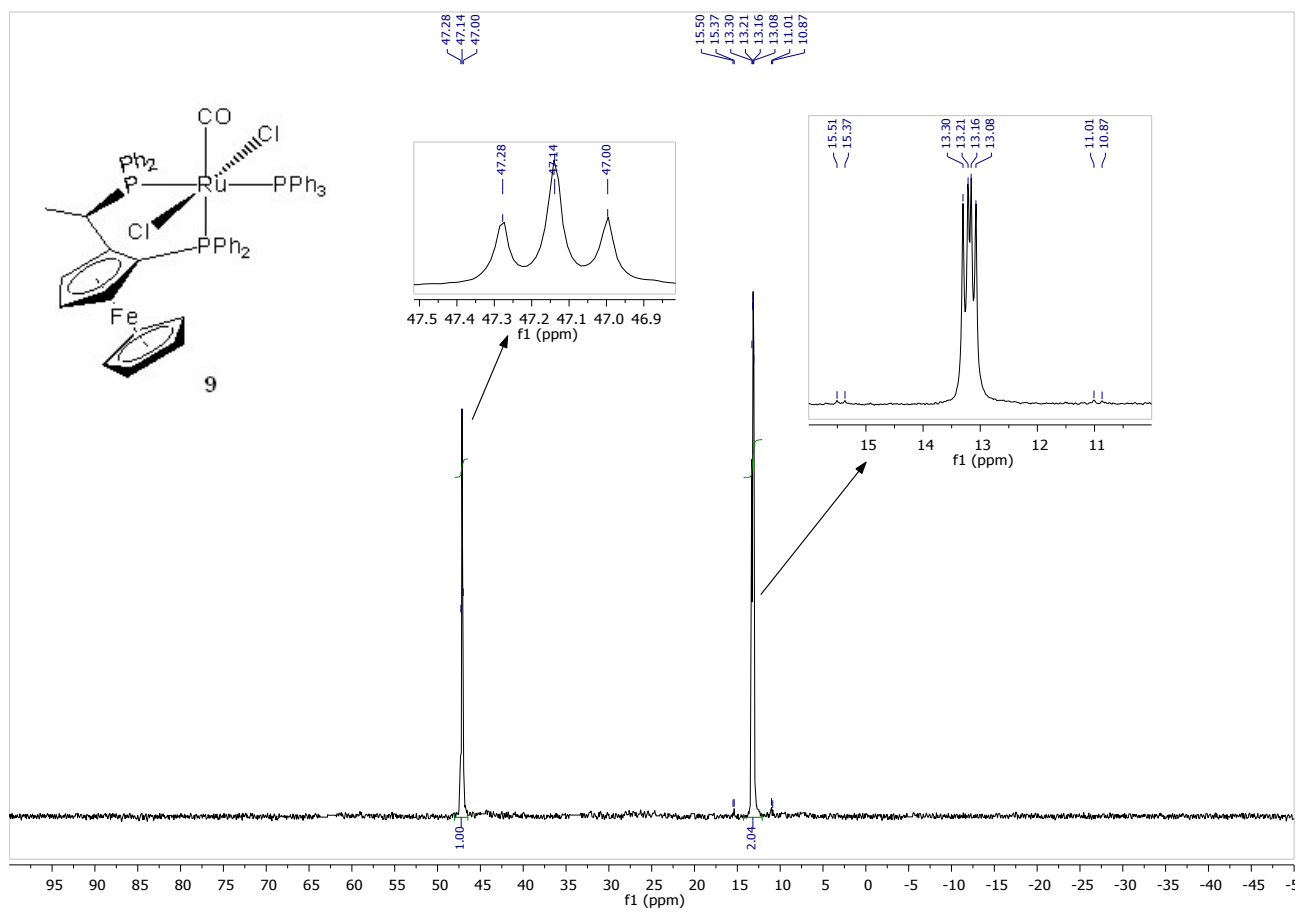

**Figure S31.**  $^{31}\text{P}\{^1\text{H}\}$  NMR spectrum (162.0 MHz) of *trans*- $[\text{RuCl}_2(\text{CO})((S,R)\text{-Josiphos})(\text{PPh}_3)]$  (**9**) in  $[\text{D}_8]\text{toluene}$  at  $20\text{ }^\circ\text{C}$ .

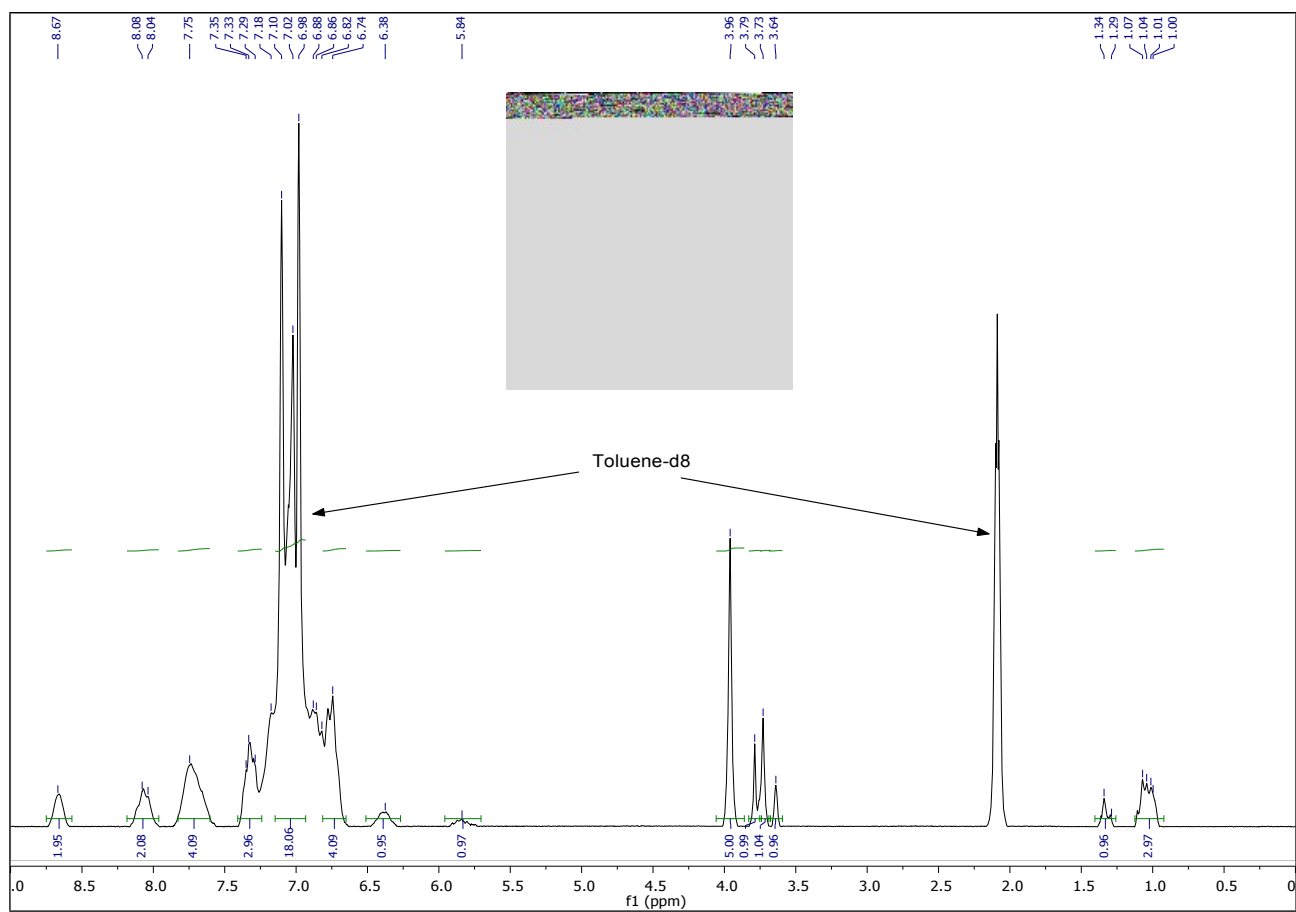

**Figure S32.** <sup>1</sup>H NMR spectrum (400.1 MHz) of *trans*-[RuCl<sub>2</sub>(CO)((*S,R*)-Josiphos)(PPh<sub>3</sub>)] (**9**) in [D<sub>8</sub>]toluene at 20 °C.

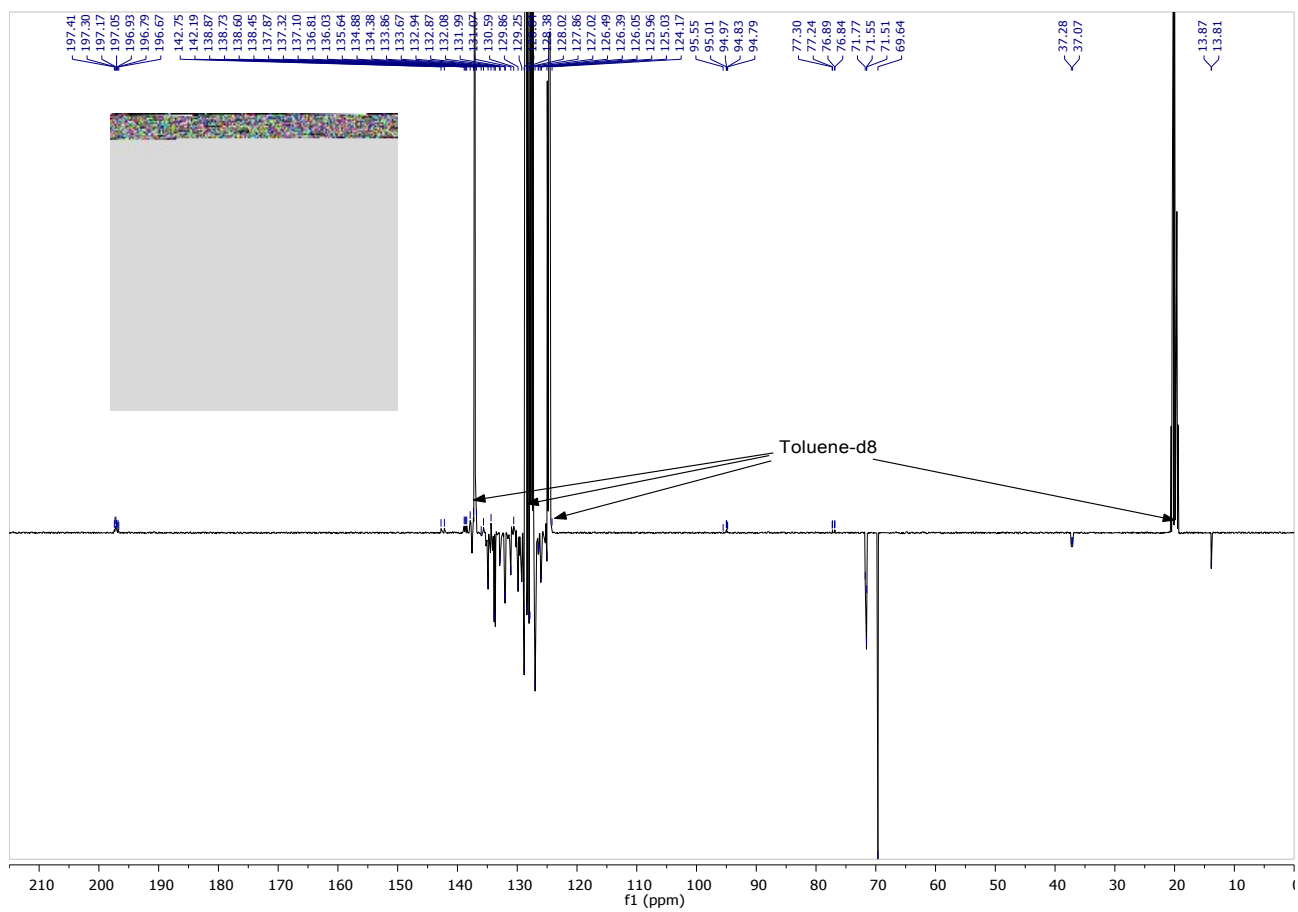

**Figure S33.**  $^{13}\text{C}\{^1\text{H}\}$  DEPTQ NMR spectrum (100.6 MHz) of *trans*-[RuCl<sub>2</sub>(CO)((*S,R*)-Josiphos)(PPh<sub>3</sub>)] (**9**) in [D<sub>8</sub>]toluene at 20 °C.

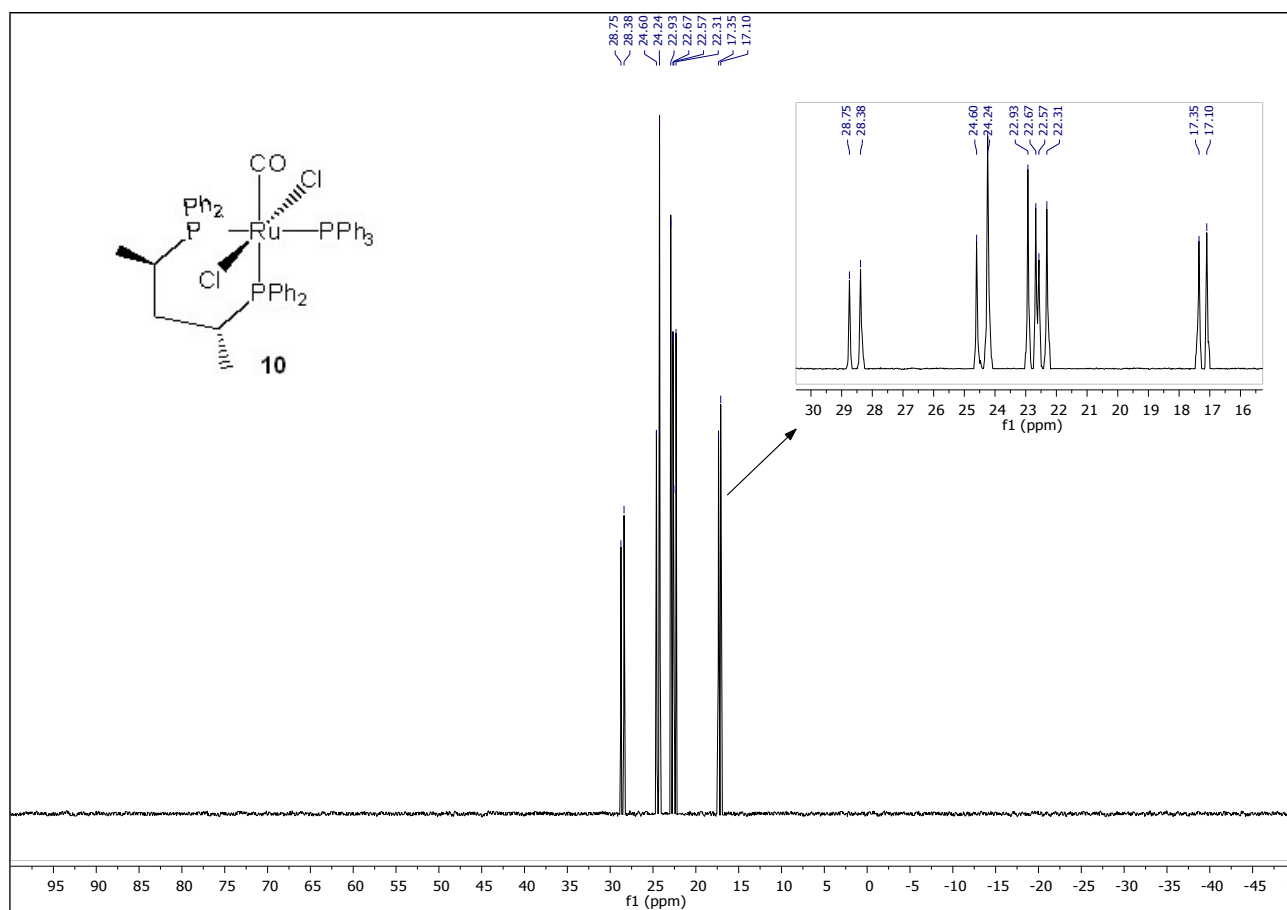

**Figure S34.**  $^{31}\text{P}\{^1\text{H}\}$  NMR spectrum (81.0 MHz) of *trans*- $[\text{RuCl}_2(\text{CO})((R,R)\text{-Skewphos})(\text{PPh}_3)]$  (**10**) in  $\text{CD}_2\text{Cl}_2$  at 20 °C.

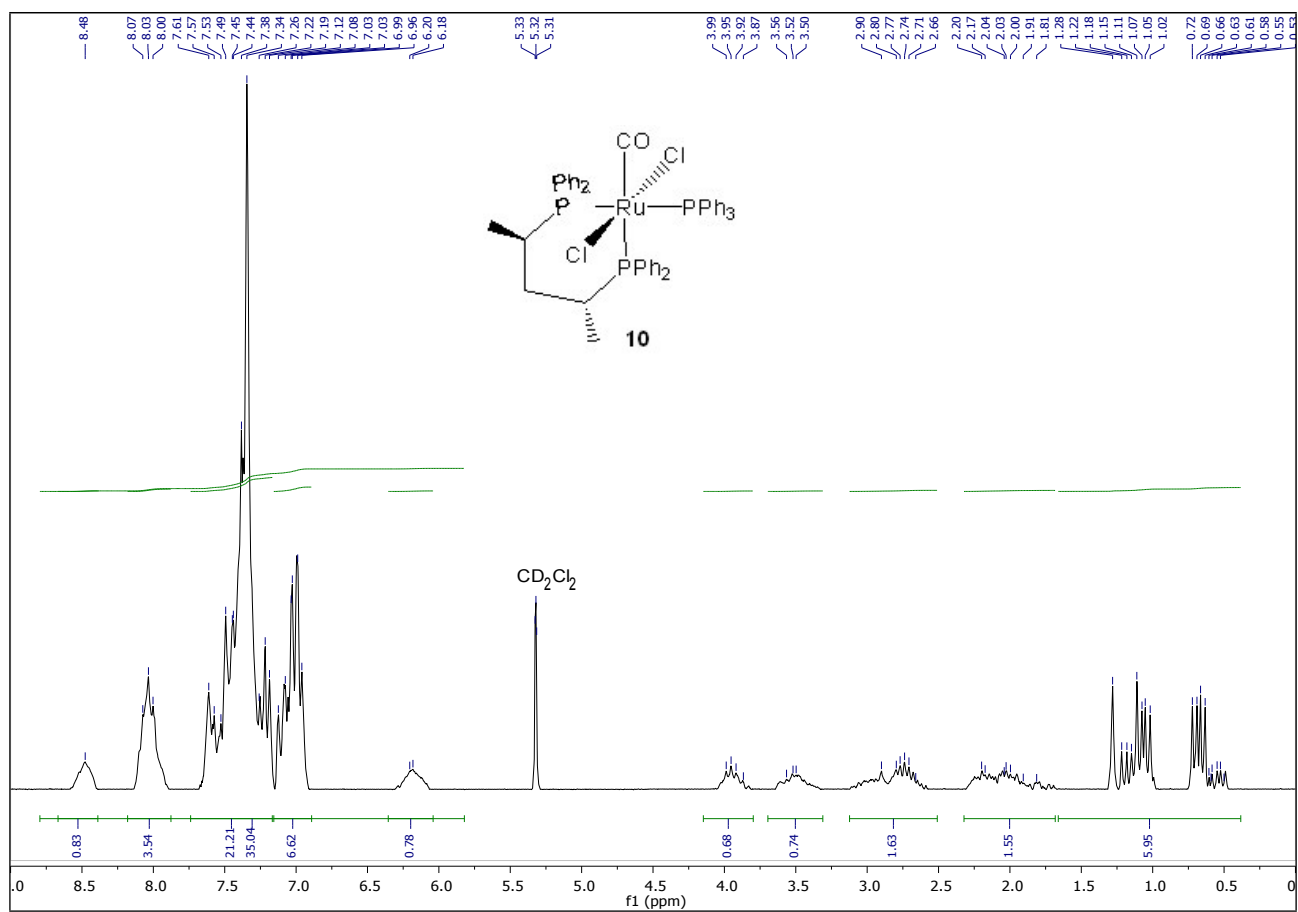

**Figure S35.**  $^1\text{H NMR}$  spectrum (200.1 MHz) of  $\text{trans-[RuCl}_2(\text{CO})((R,R)\text{-Skewphos})(\text{PPh}_3)]$  (**10**) in  $\text{CD}_2\text{Cl}_2$  at 20 °C.



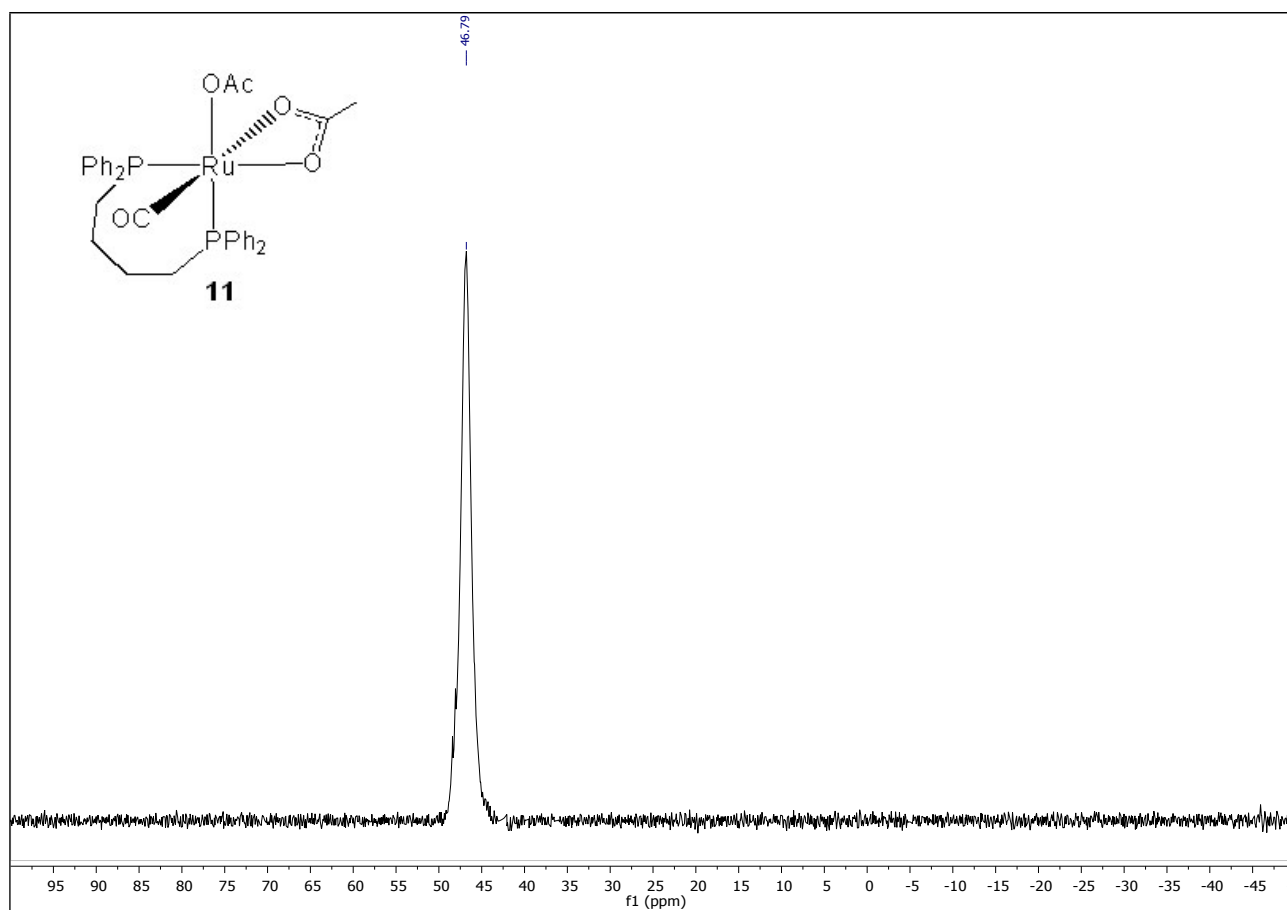

**Figure S36.**  $^{31}\text{P}\{^1\text{H}\}$  NMR spectrum (81.0 MHz) of  $[\text{Ru}(\text{OAc})_2(\text{CO})(\text{dppb})]$  (**11**) in  $\text{CD}_2\text{Cl}_2$  at  $20^\circ\text{C}$ .

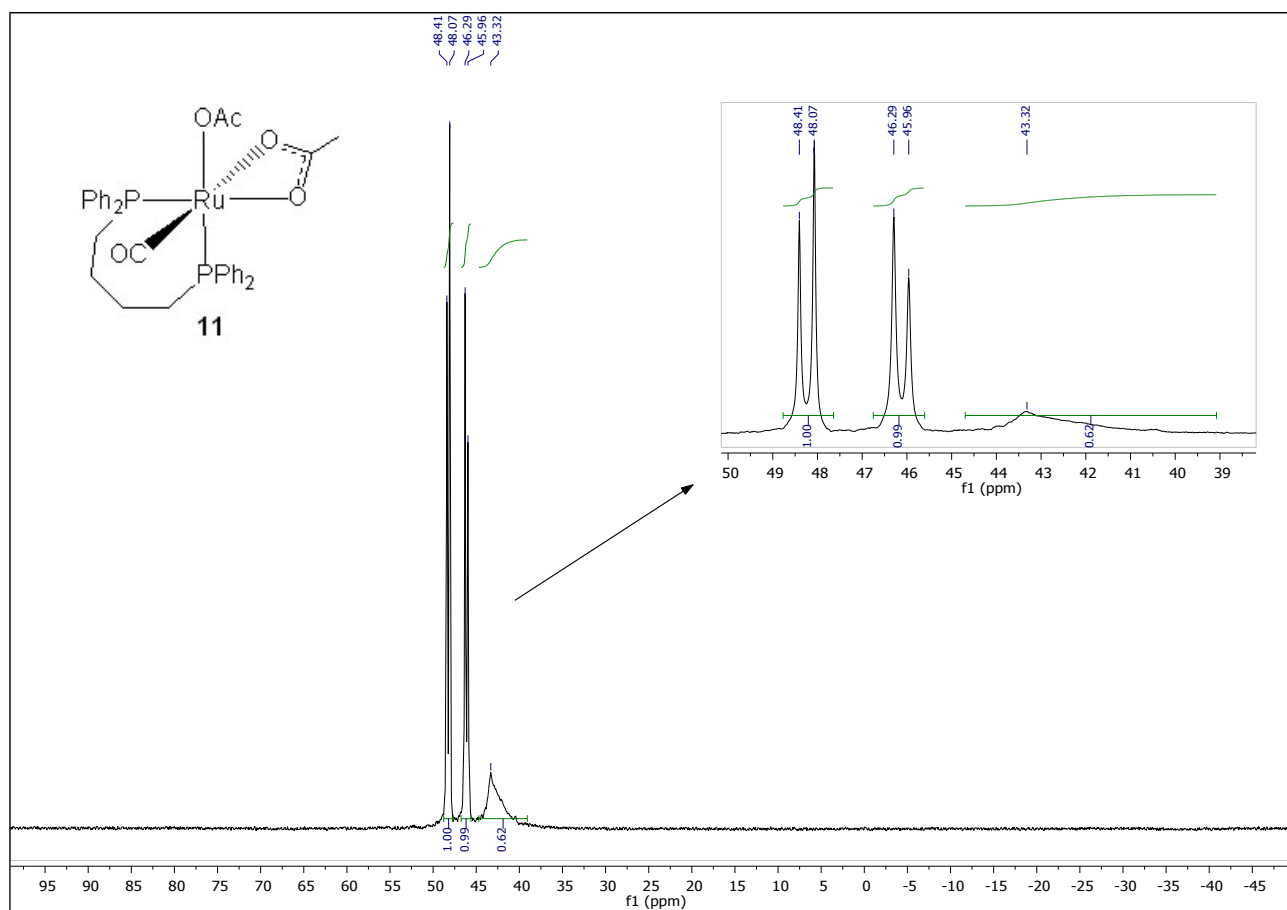

**Figure S37.**  $^{31}\text{P}\{^1\text{H}\}$  NMR spectrum (81.0 MHz) of  $[\text{Ru}(\text{OAc})_2(\text{CO})(\text{dppb})]$  (**11**) in  $\text{CD}_2\text{Cl}_2$  at  $-60\text{ }^\circ\text{C}$ .

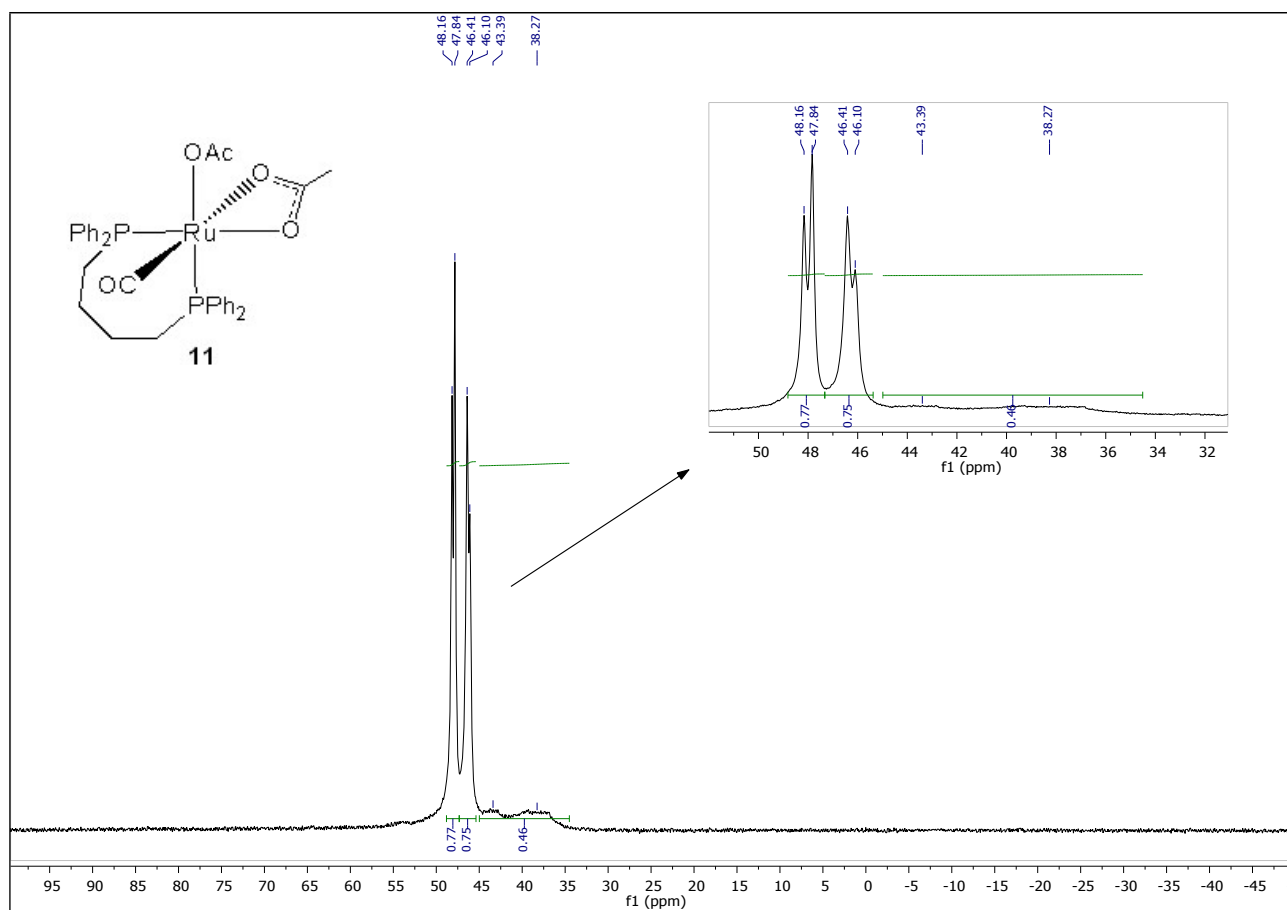

**Figure S38.** <sup>31</sup>P{<sup>1</sup>H} NMR spectrum (81.0 MHz) of [Ru(OAc)<sub>2</sub>(CO)(dppb)] (**11**) in CD<sub>2</sub>Cl<sub>2</sub> at -80 °C.

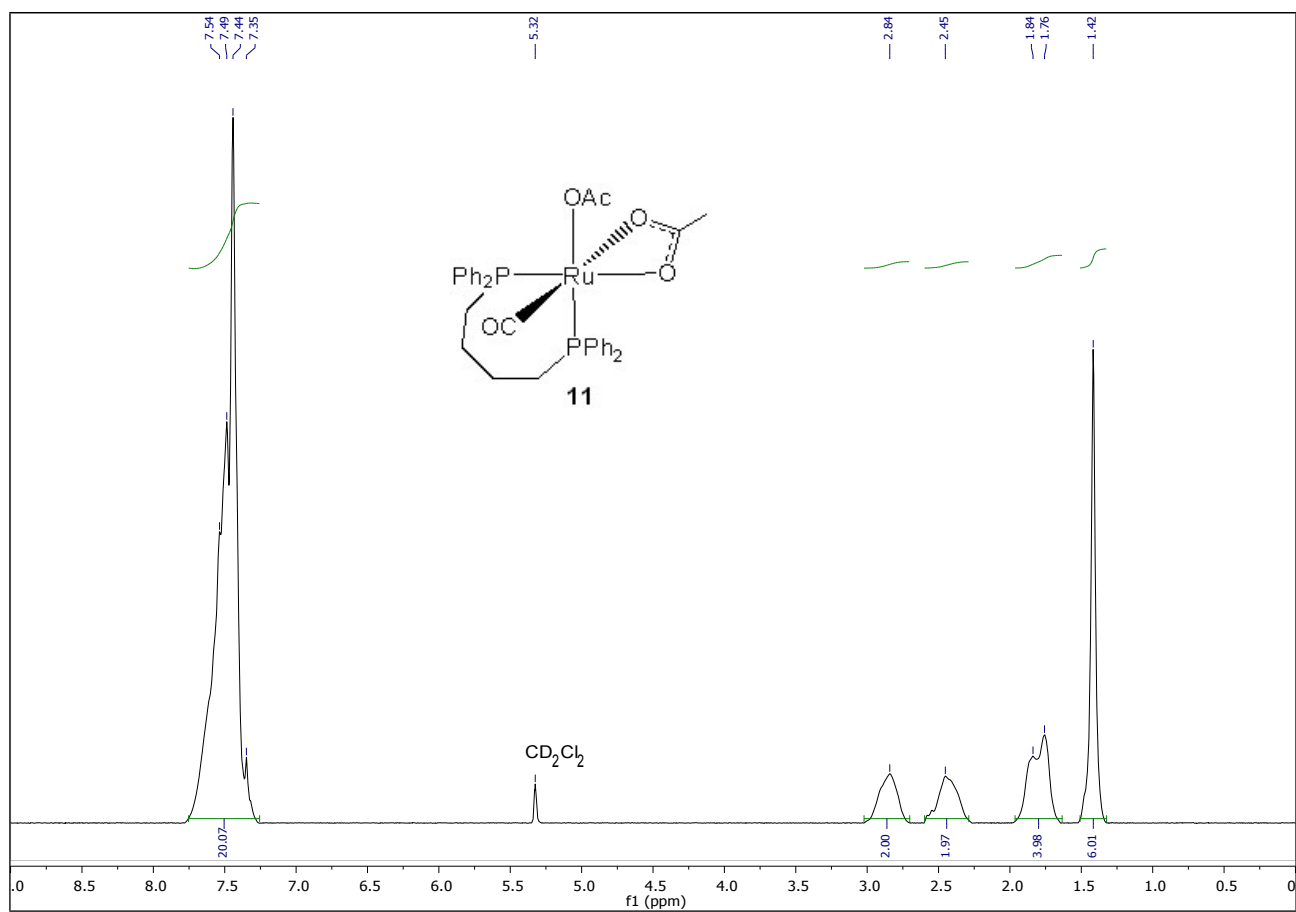

**Figure S39.**  $^1\text{H}$  NMR spectrum (200.1 MHz) of  $[\text{Ru}(\text{OAc})_2(\text{CO})(\text{dppb})]$  (11) in  $\text{CD}_2\text{Cl}_2$  at  $20\text{ }^\circ\text{C}$ .

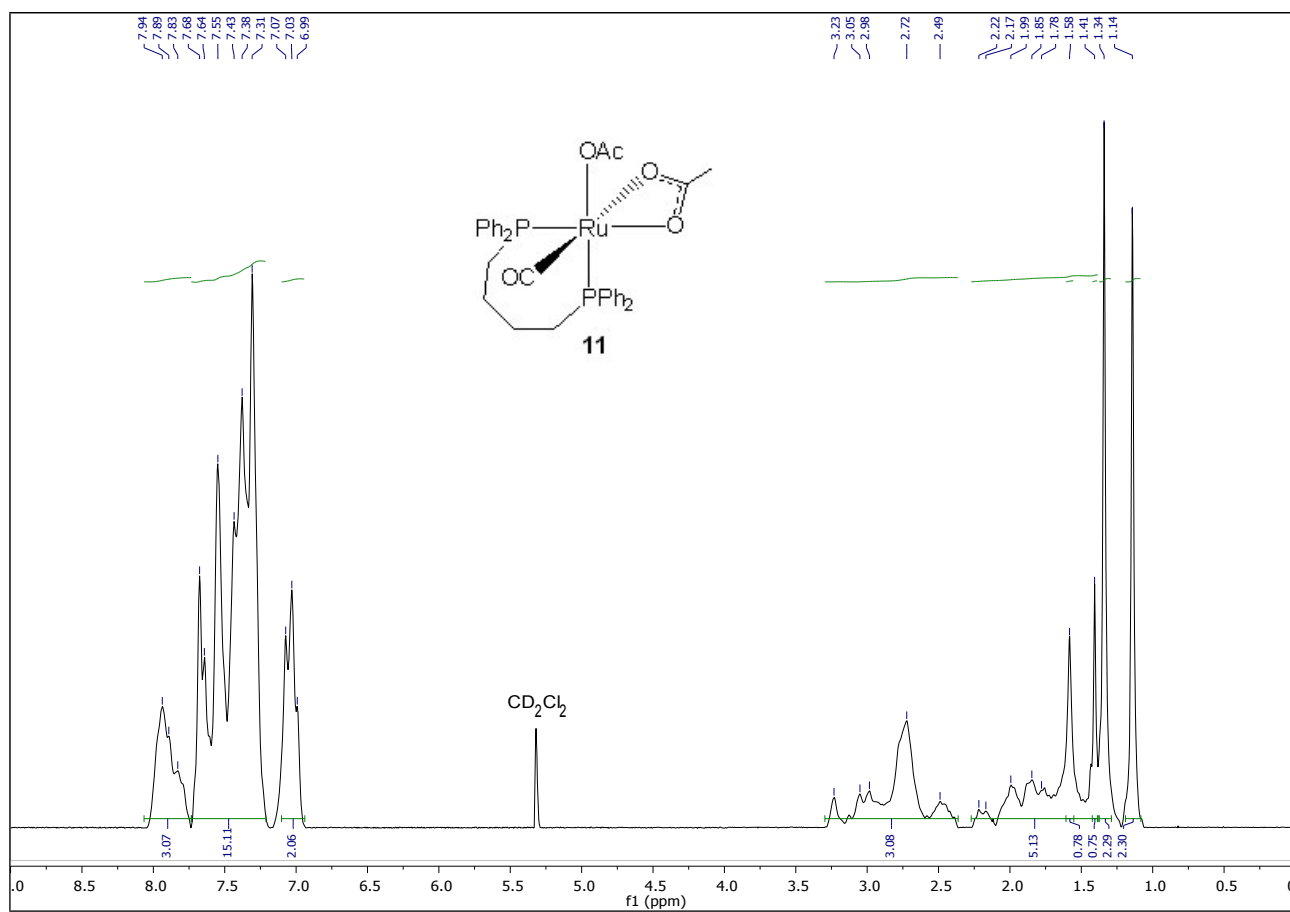

**Figure S40.** <sup>1</sup>H NMR spectrum (200.1 MHz) of [Ru(OAc)<sub>2</sub>(CO)(dppb)] (**11**) in CD<sub>2</sub>Cl<sub>2</sub> at -80 °C.

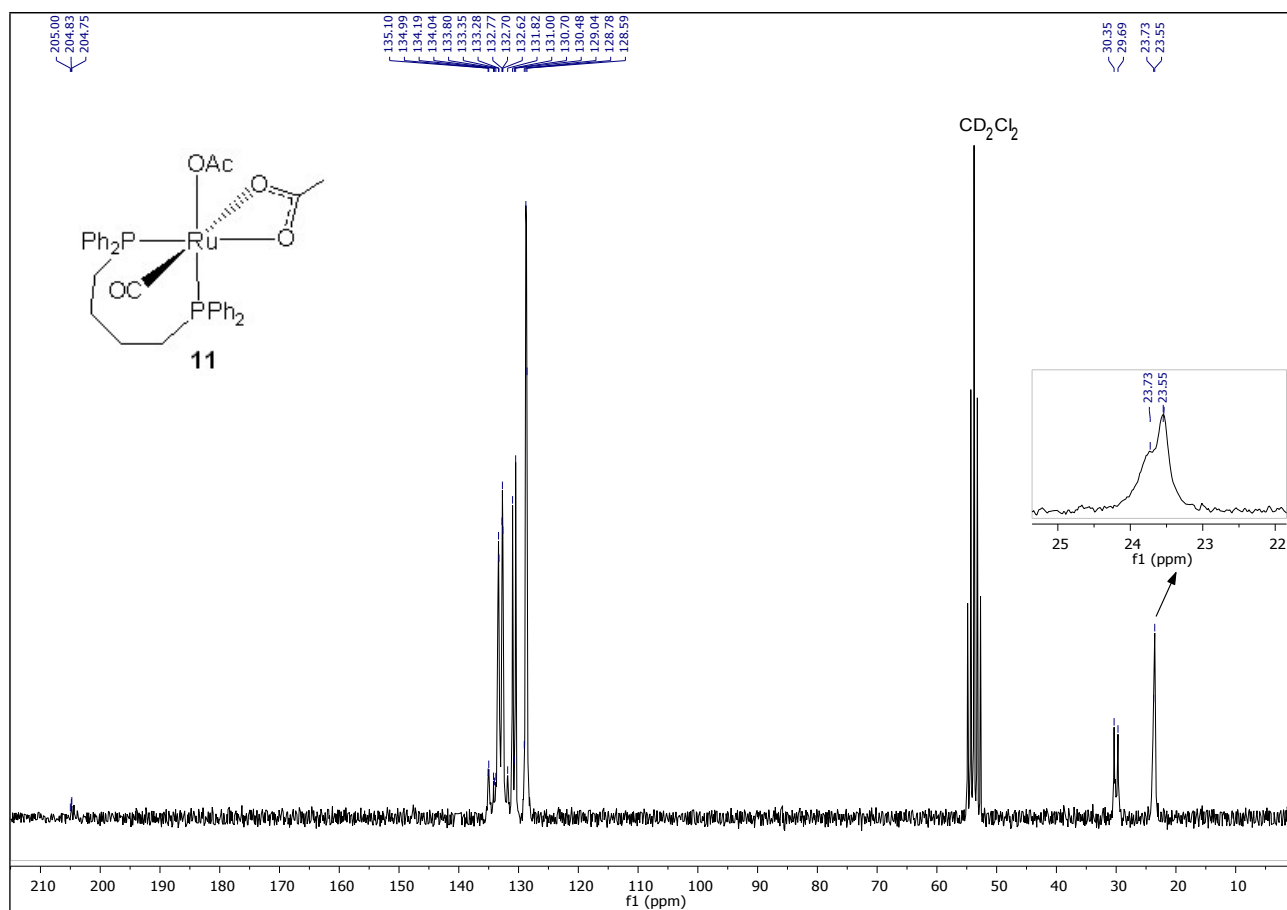

**Figure S41.**  $^{13}\text{C}\{^1\text{H}\}$  NMR spectrum (50.3 MHz) of  $[\text{Ru}(\text{OAc})_2(\text{CO})(\text{dppb})]$  (**11**) in  $\text{CD}_2\text{Cl}_2$  at  $20\text{ }^\circ\text{C}$ .

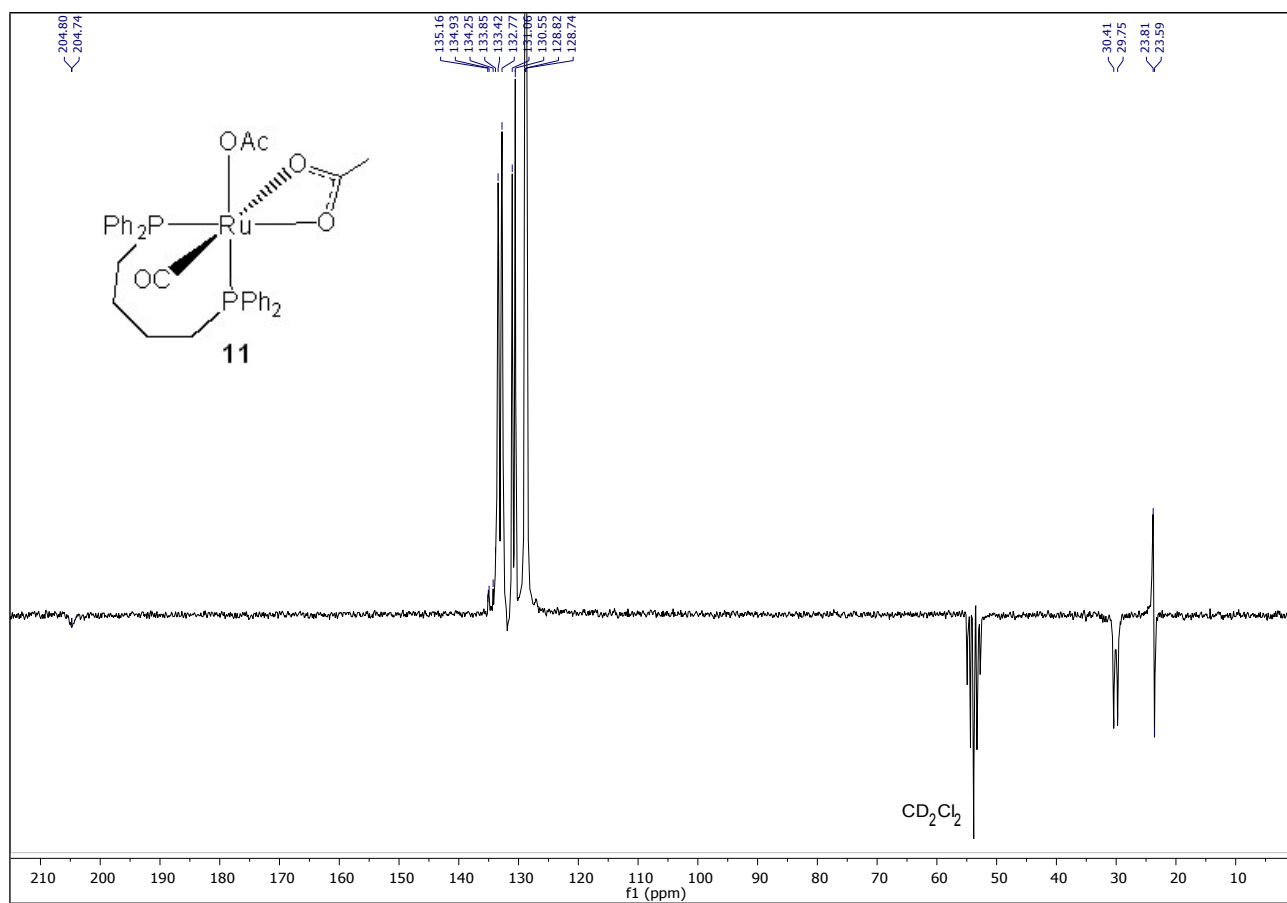

**Figure S42.**  $^{13}\text{C}\{^1\text{H}\}$  PENDANT NMR spectrum (50.3 MHz) of  $[\text{Ru}(\text{OAc})_2(\text{CO})(\text{dppb})]$  (**11**) in  $\text{CD}_2\text{Cl}_2$  at  $20\text{ }^\circ\text{C}$ .

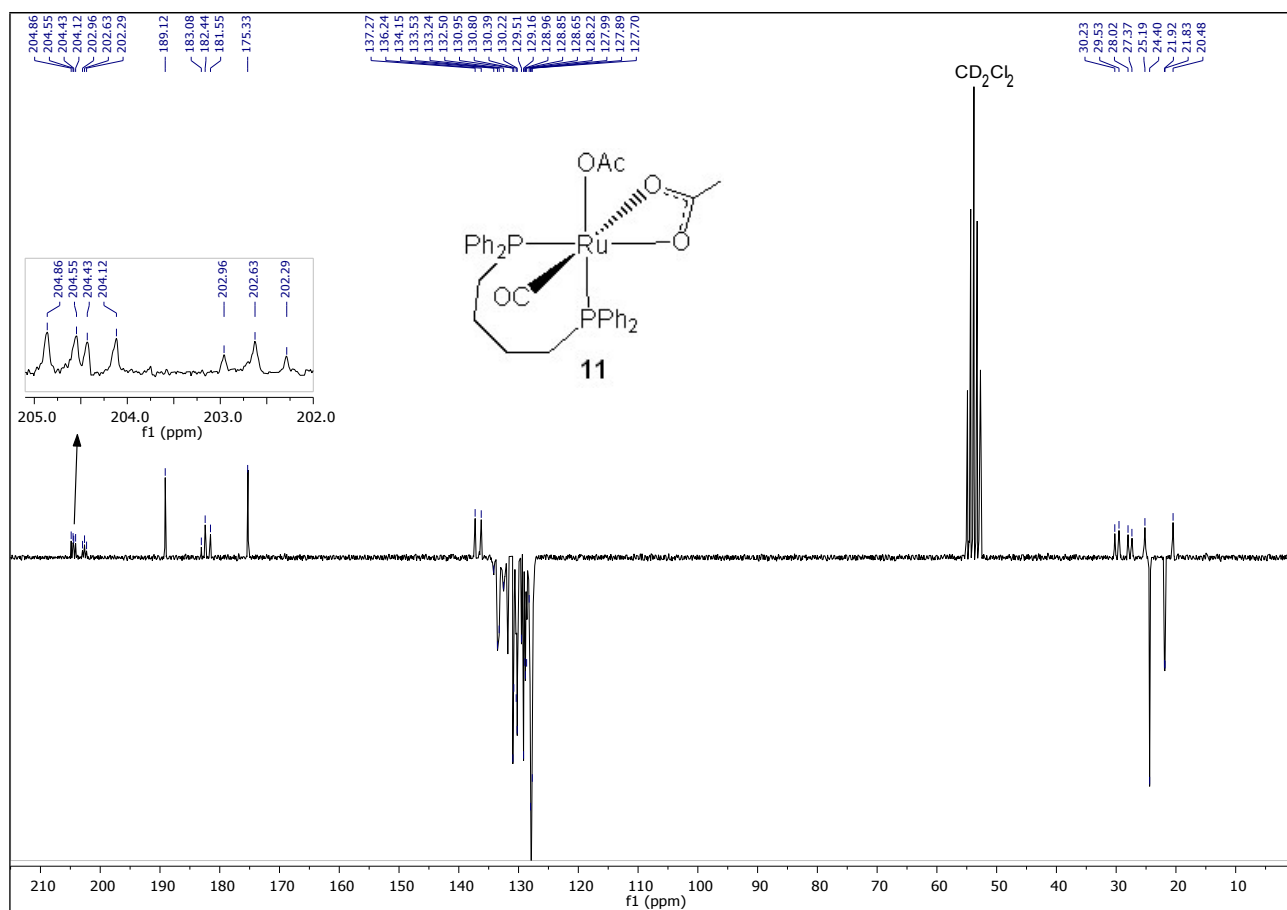

**Figure S43.**  $^{13}\text{C}\{^1\text{H}\}$  PENDANT NMR spectrum (50.3 MHz) of  $[\text{Ru}(\text{OAc})_2(\text{CO})(\text{dppb})]$  (**11**) in  $\text{CD}_2\text{Cl}_2$  at  $-80\text{ }^\circ\text{C}$ .



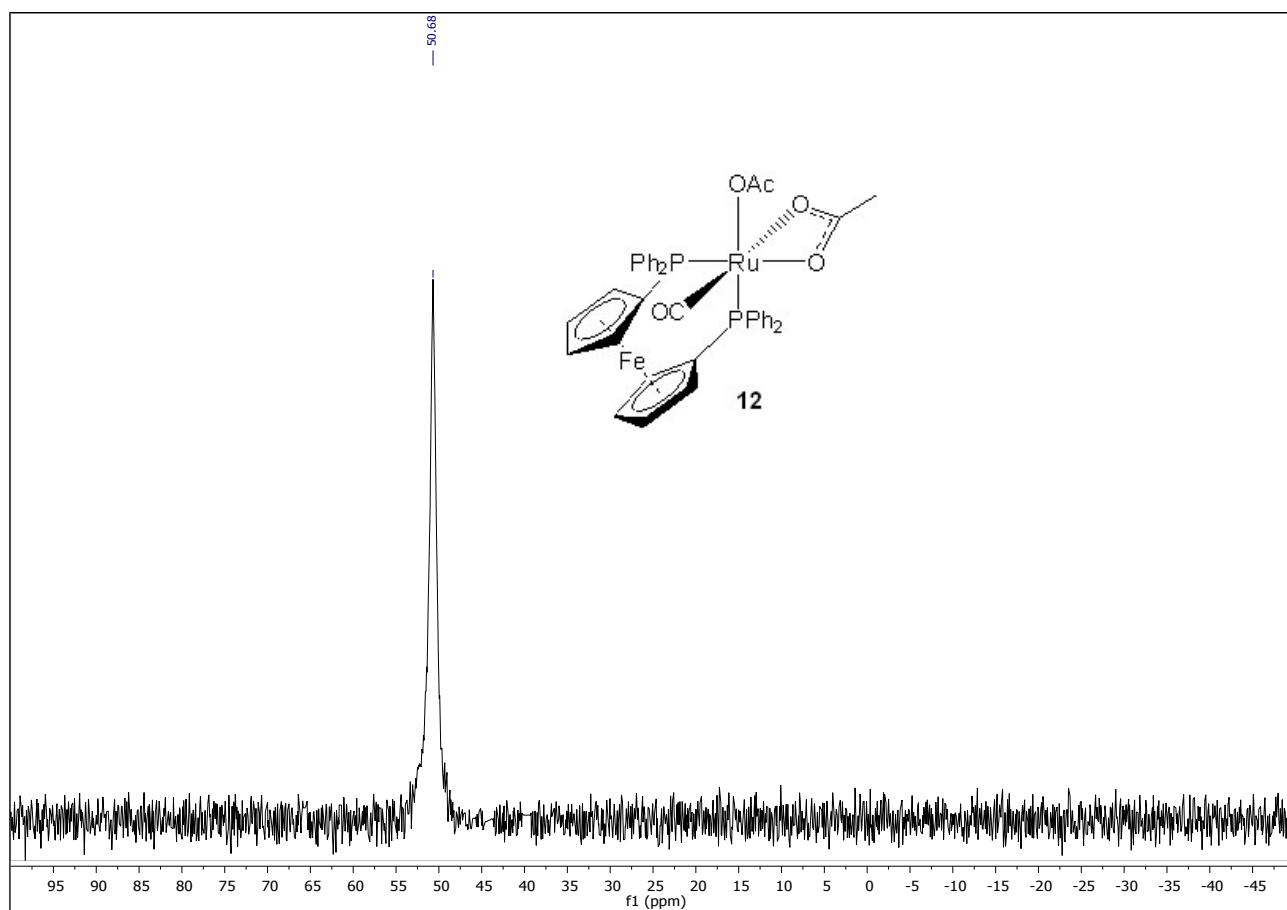

**Figure S44.**  $^{31}\text{P}\{^1\text{H}\}$  NMR spectrum (81.0 MHz) of  $[\text{Ru}(\text{OAc})_2(\text{CO})(\text{dppf})]$  (**12**) in  $\text{CD}_2\text{Cl}_2$  at 20 °C.

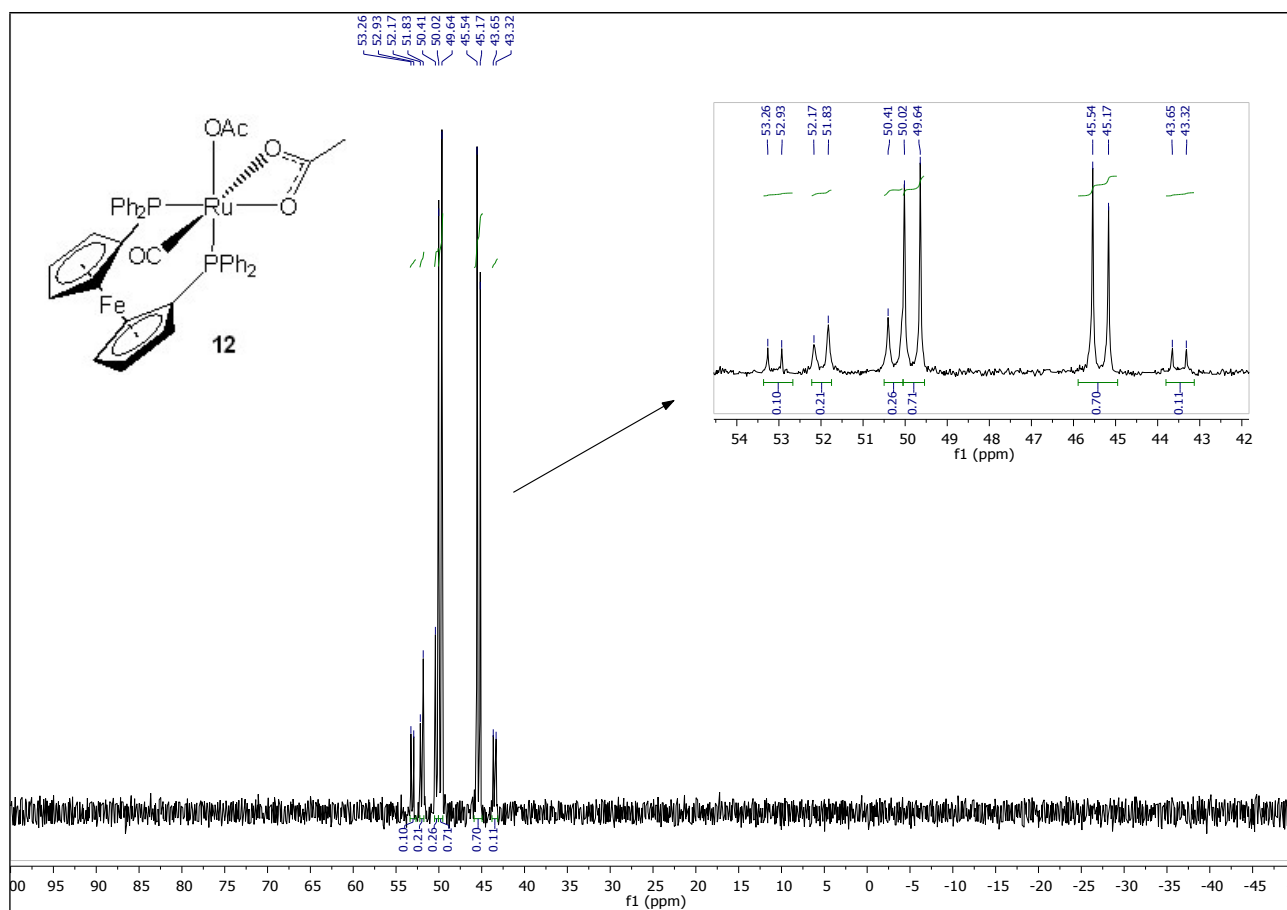

**Figure S45.**  $^{31}\text{P}\{^1\text{H}\}$  NMR spectrum (81.0 MHz) of  $[\text{Ru}(\text{OAc})_2(\text{CO})(\text{dppf})]$  (**12**) in  $\text{CD}_2\text{Cl}_2$  at  $-70$   $^\circ\text{C}$ .

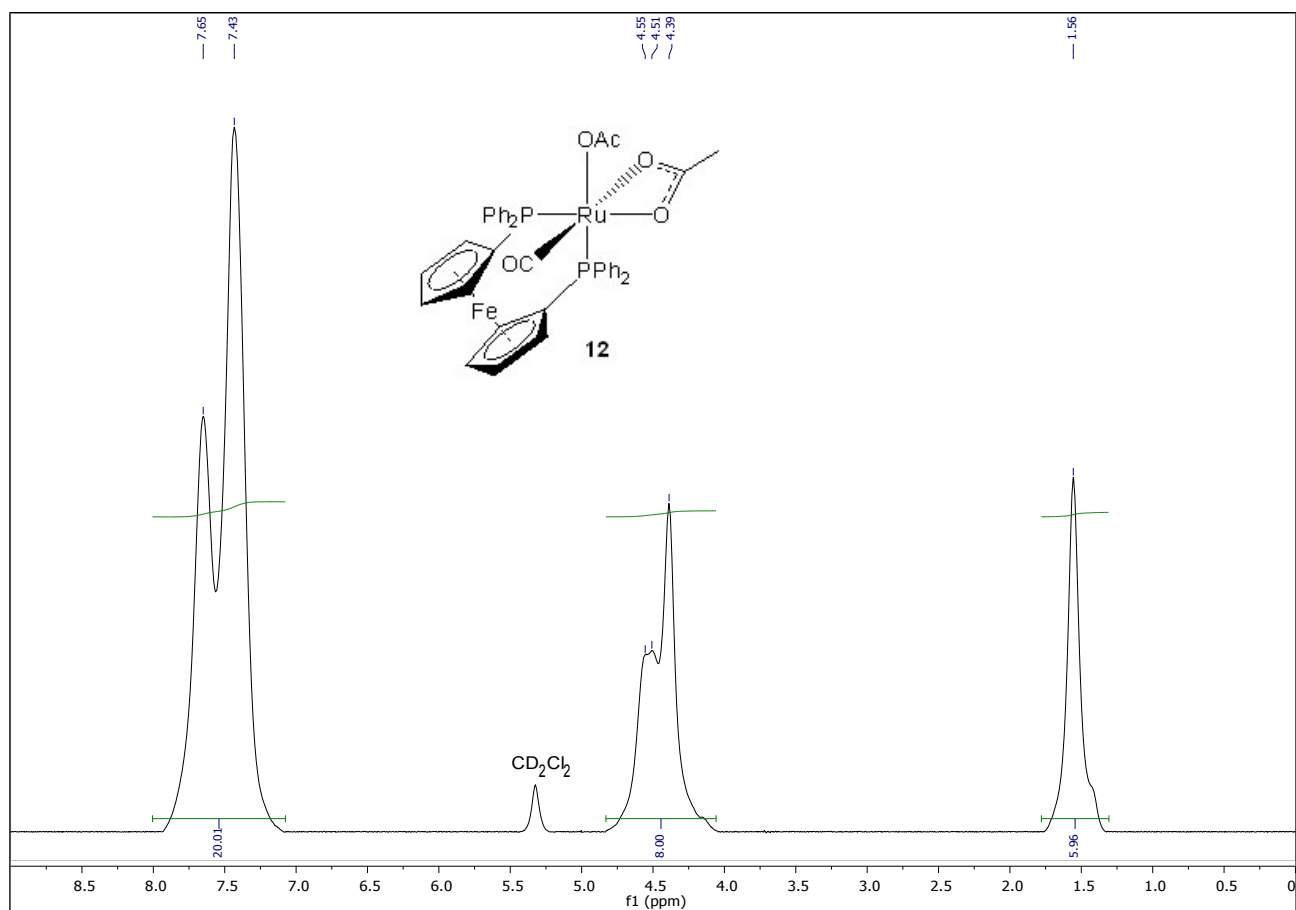

**Figure S46.** <sup>1</sup>H NMR spectrum (200.1 MHz) of [Ru(OAc)<sub>2</sub>(CO)(dppf)] (**12**) in CD<sub>2</sub>Cl<sub>2</sub> at 20 °C.

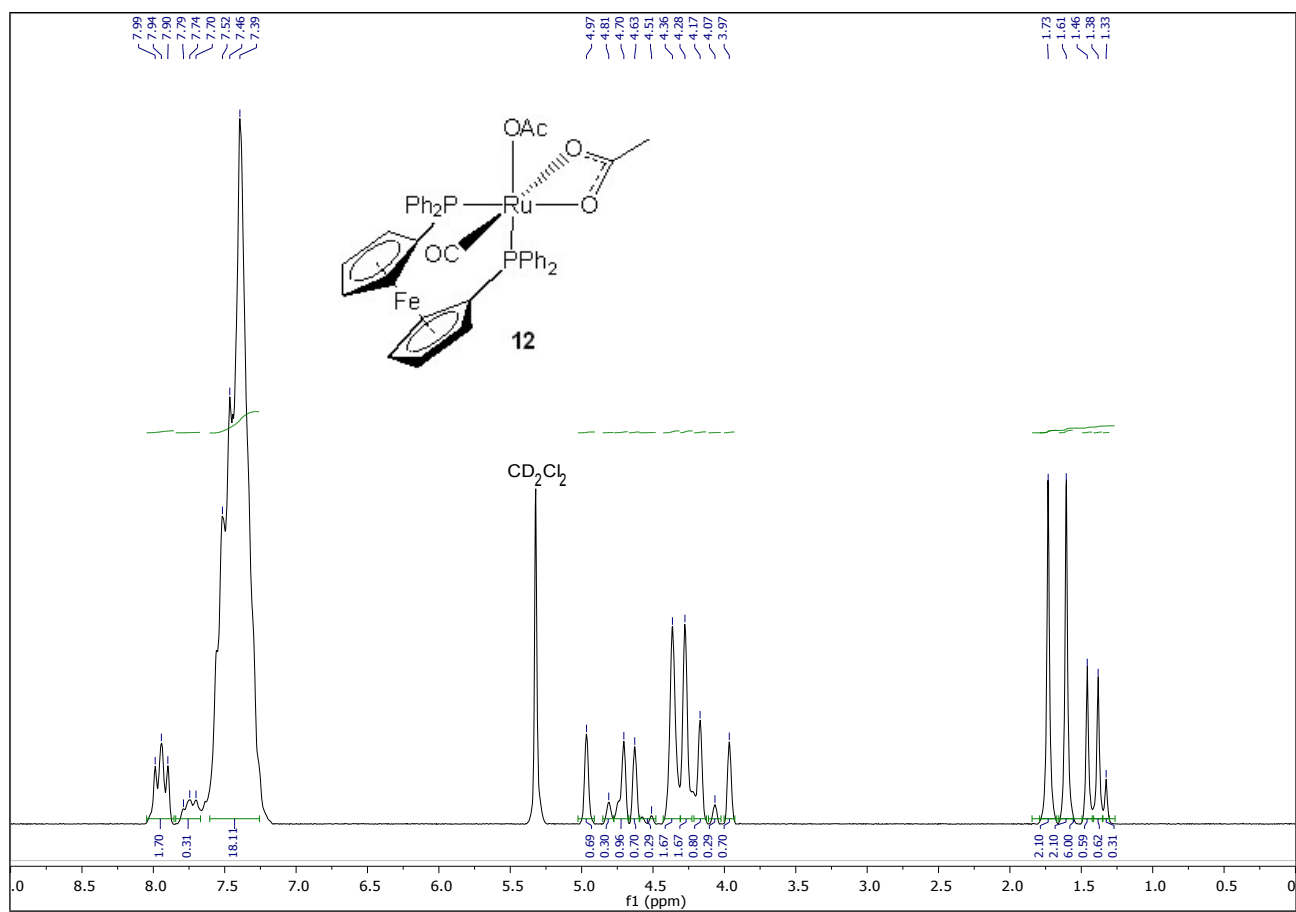

**Figure S47.** <sup>1</sup>H NMR spectrum (200.1 MHz) of [Ru(OAc)<sub>2</sub>(CO)(dppf)] (**12**) in CD<sub>2</sub>Cl<sub>2</sub> at -70 °C.

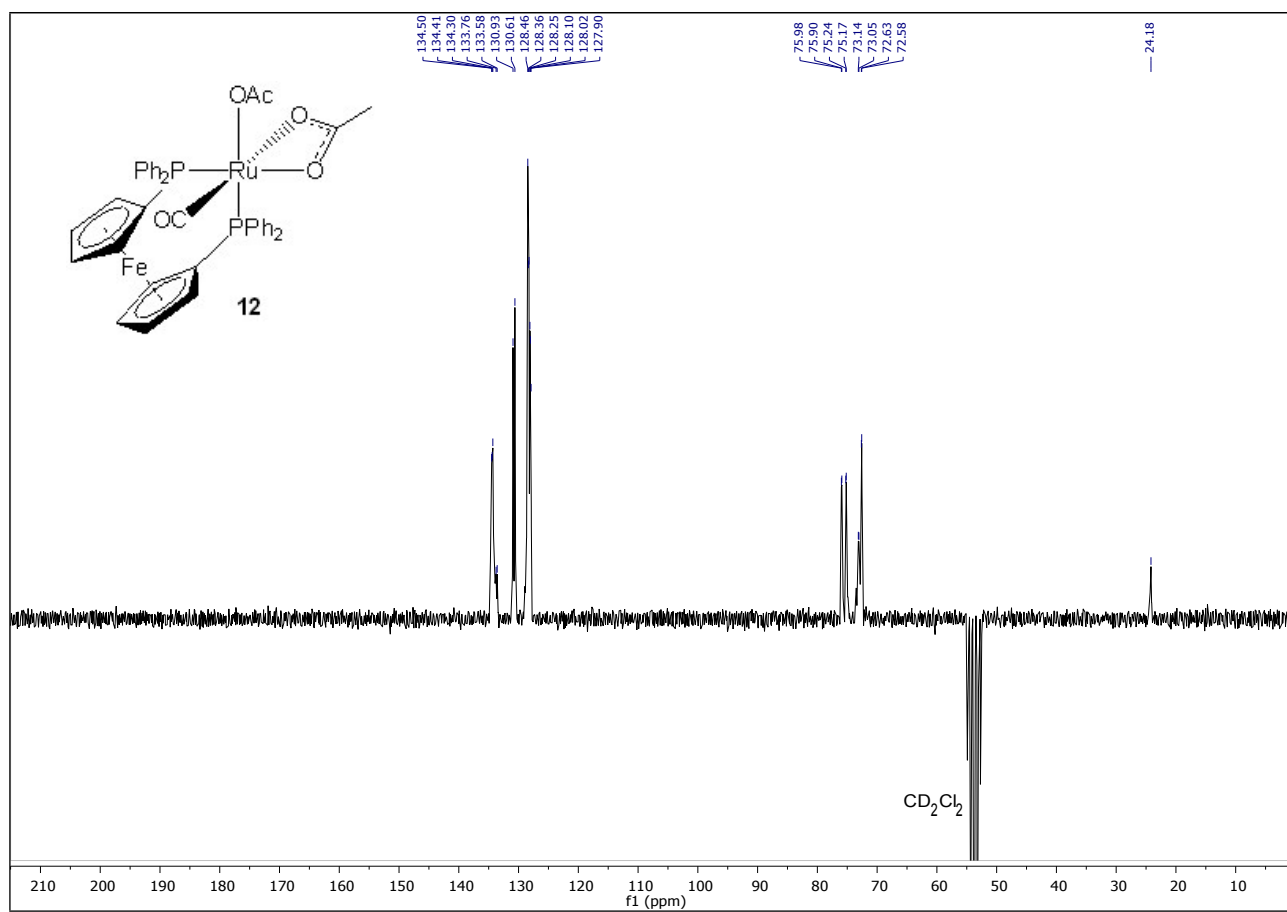

**Figure S48.** <sup>13</sup>C{<sup>1</sup>H} PENDANT NMR spectrum (50.3 MHz) of [Ru(OAc)<sub>2</sub>(CO)(dppf)] (**12**) in CD<sub>2</sub>Cl<sub>2</sub> at 20 °C.

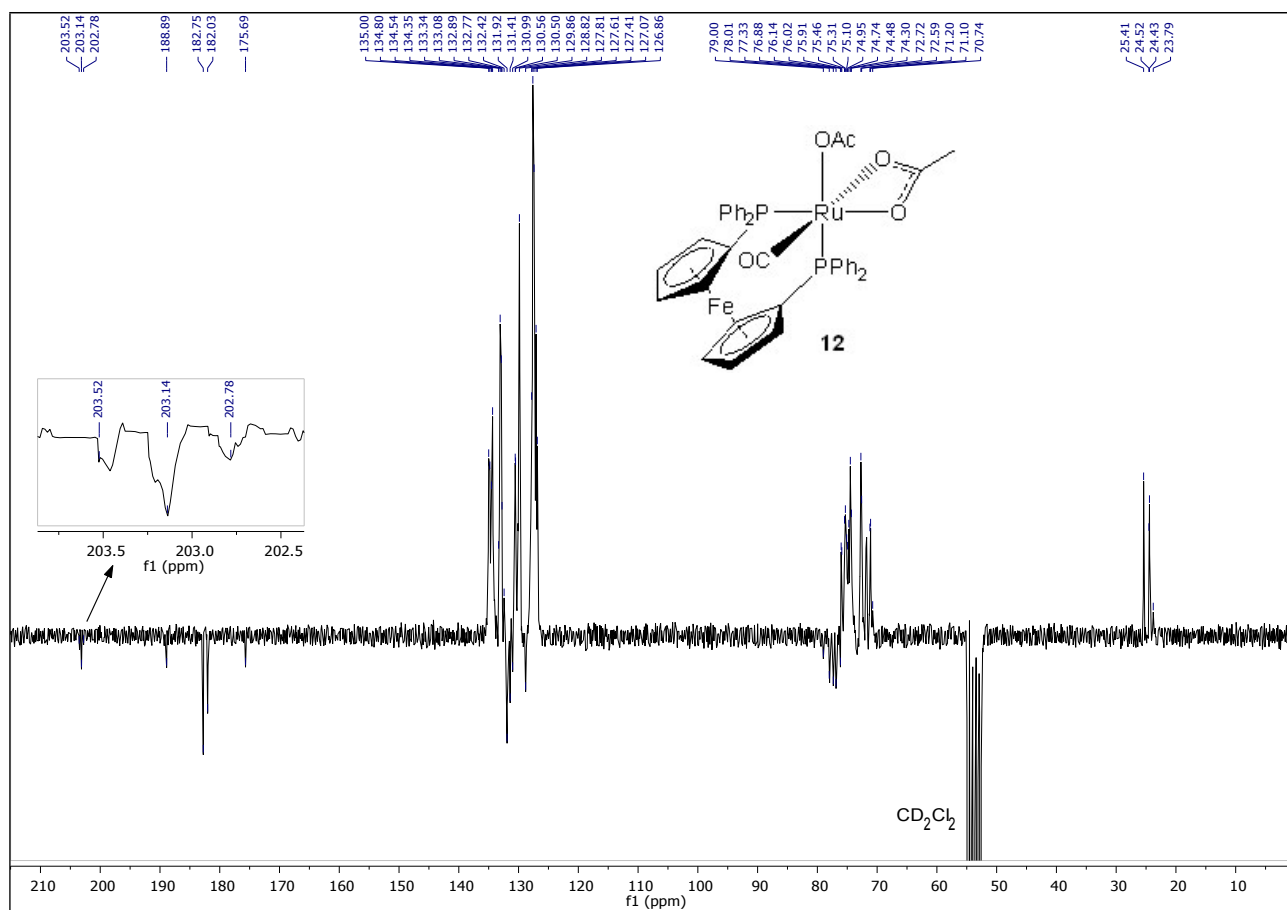

**Figure S49.**  $^{13}\text{C}\{^1\text{H}\}$  PENDANT NMR spectrum (50.3 MHz) of  $[\text{Ru}(\text{OAc})_2(\text{CO})(\text{dppf})]$  (**12**) in  $\text{CD}_2\text{Cl}_2$  at  $-70\text{ }^\circ\text{C}$ .

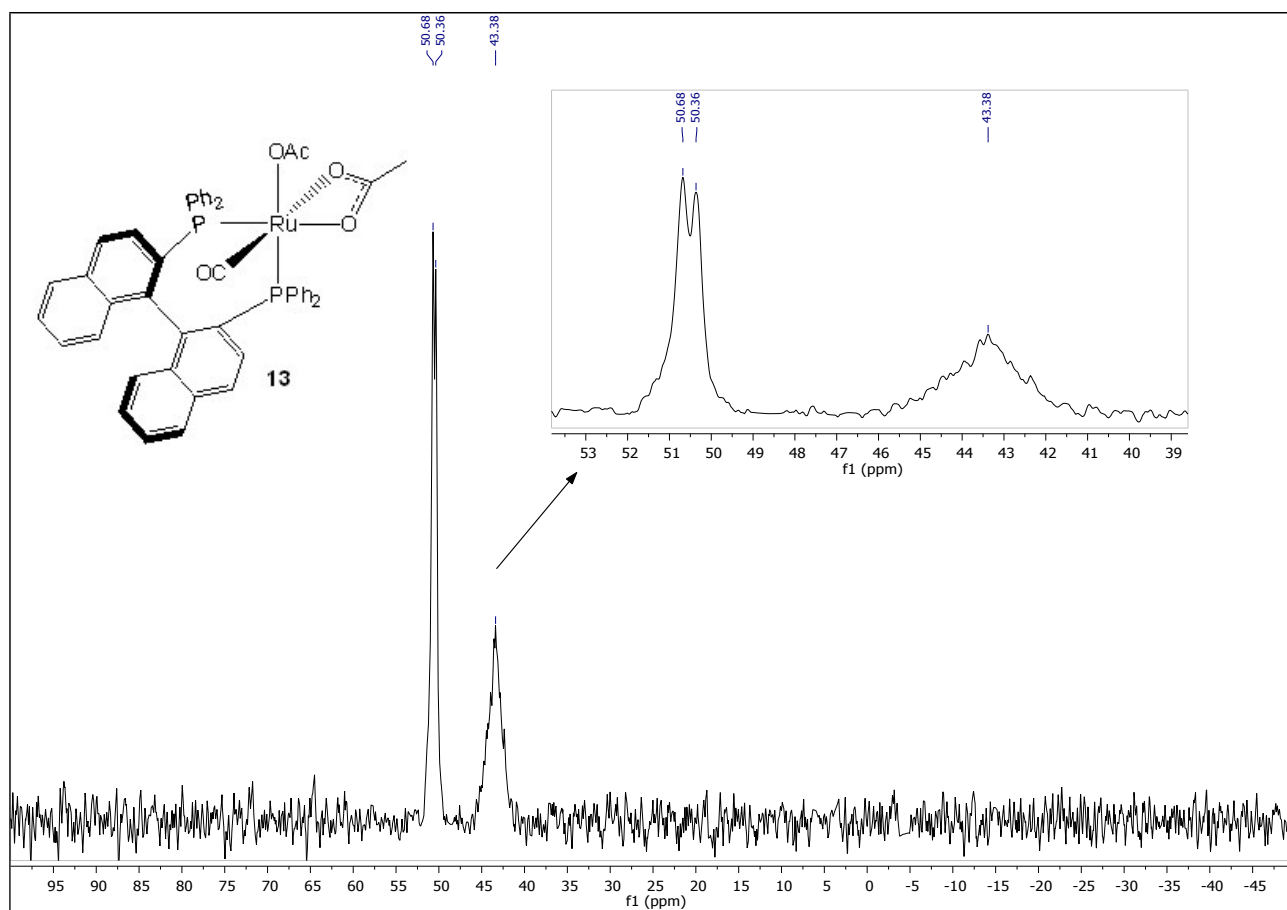

**Figure S50.**  $^{31}\text{P}\{^1\text{H}\}$  NMR spectrum (81.0 MHz) of  $[\text{Ru}(\text{OAc})_2(\text{CO})((R)\text{-BINAP})]$  (**13**) in  $\text{CD}_2\text{Cl}_2$  at 20 °C.

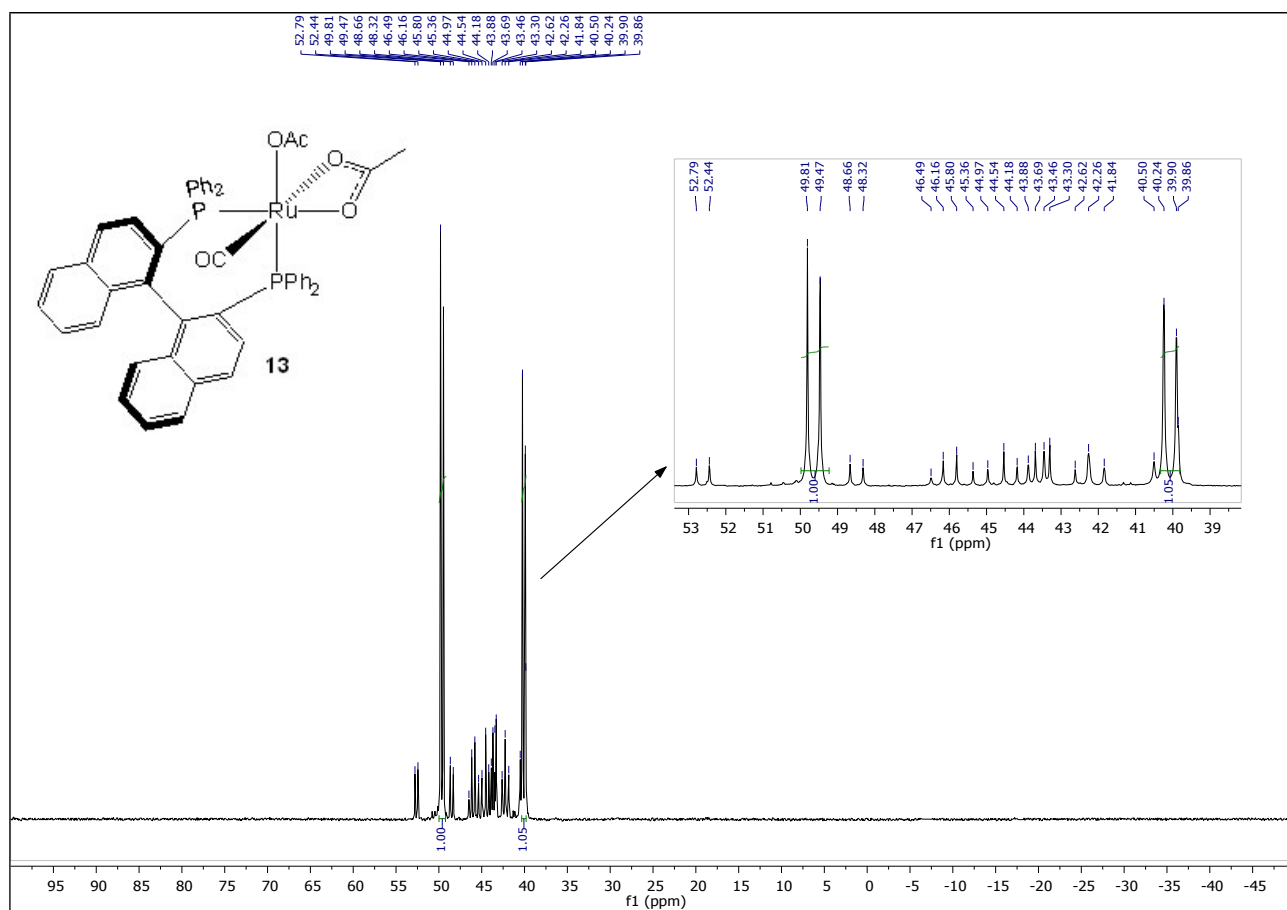

**Figure S51.**  $^{31}\text{P}\{^1\text{H}\}$  NMR spectrum (81.0 MHz) of  $[\text{Ru}(\text{OAc})_2(\text{CO})((R)\text{-BINAP})]$  (**13**) in  $\text{CD}_2\text{Cl}_2$  at  $-60\text{ }^\circ\text{C}$ .



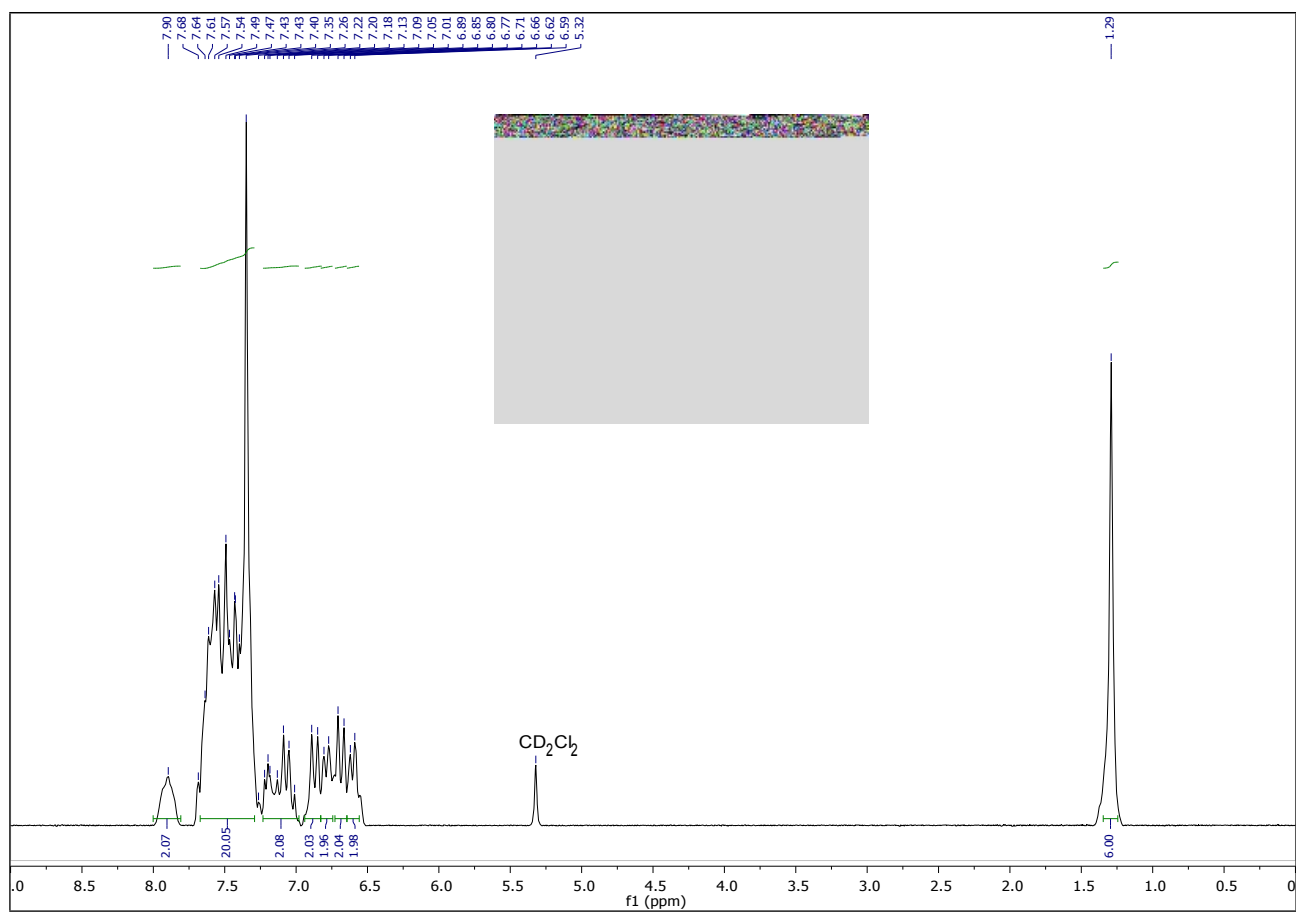

**Figure S52.**  $^1\text{H}$  NMR spectrum (200.1 MHz) of  $[\text{Ru}(\text{OAc})_2(\text{CO})((R)\text{-BINAP})]$  (**13**) in  $\text{CD}_2\text{Cl}_2$  at 20  $^\circ\text{C}$ .

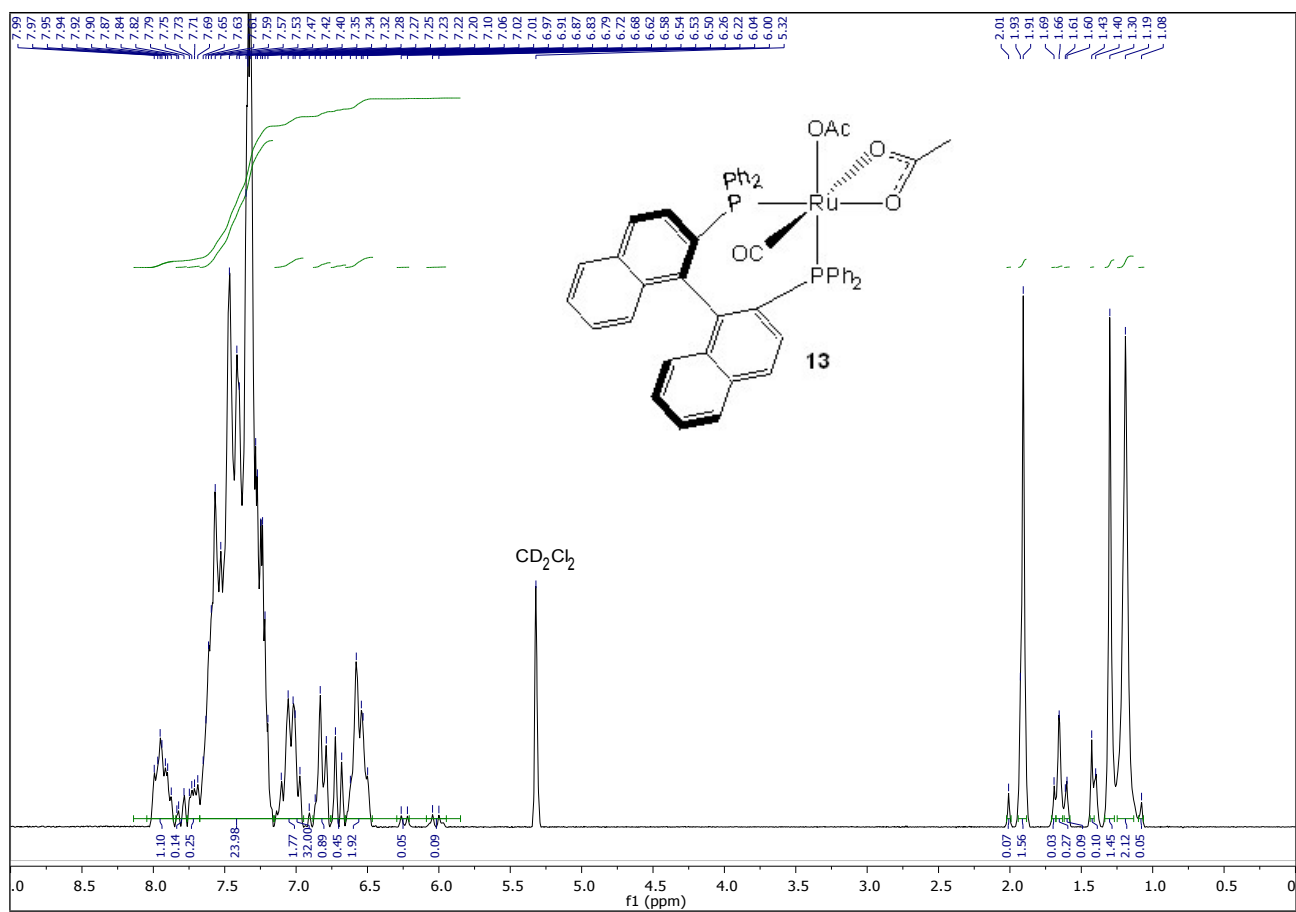

**Figure S53.** <sup>1</sup>H NMR spectrum (200.1 MHz) of [Ru(OAc)<sub>2</sub>(CO)((*R*)-BINAP)] (**13**) in CD<sub>2</sub>Cl<sub>2</sub> at -60 °C.

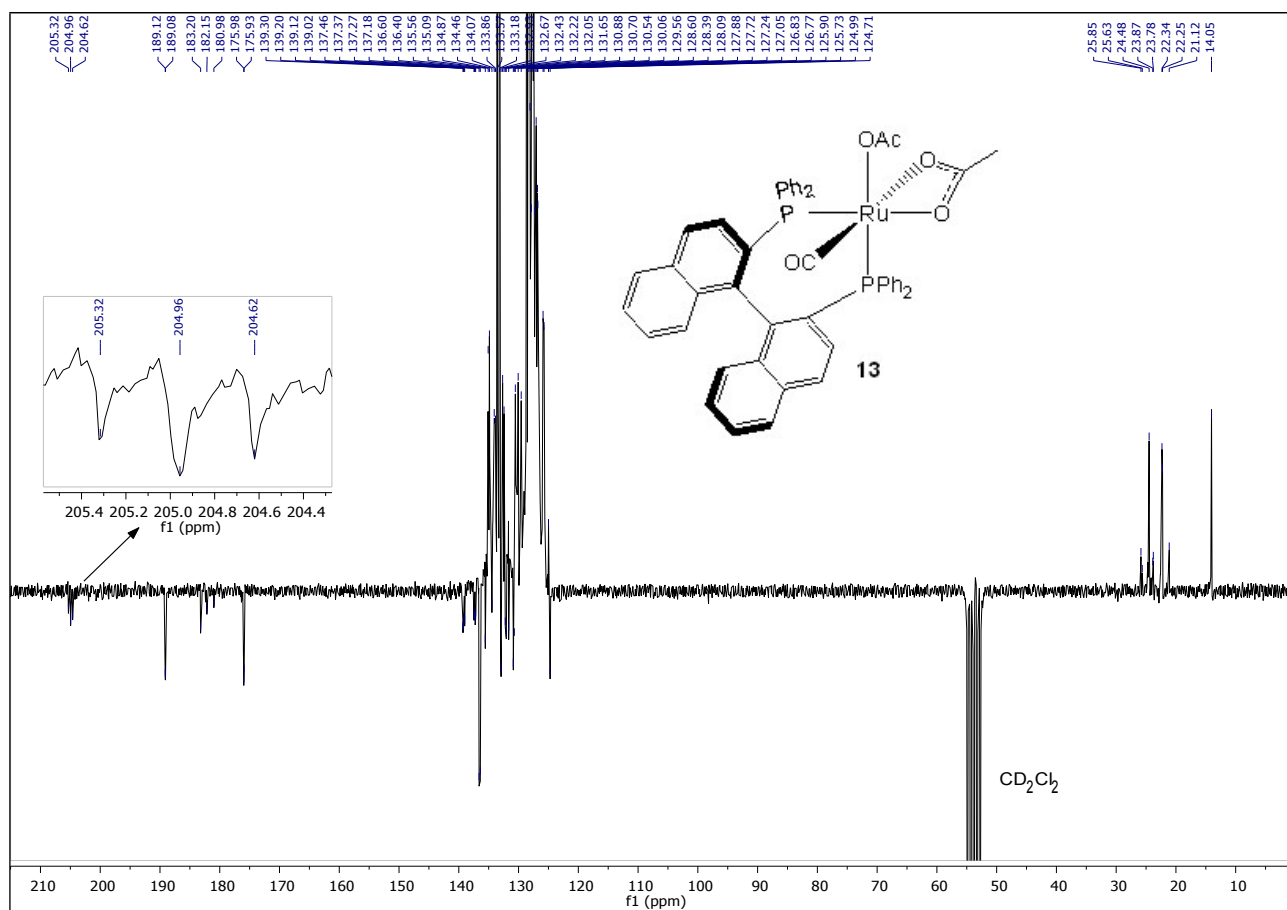

**Figure S54.**  $^{13}\text{C}\{^1\text{H}\}$  PENDANT NMR spectrum (50.3 MHz) of  $[\text{Ru}(\text{OAc})_2(\text{CO})((R)\text{-BINAP})]$  (**13**) in  $\text{CD}_2\text{Cl}_2$  at  $-60\text{ }^\circ\text{C}$ .

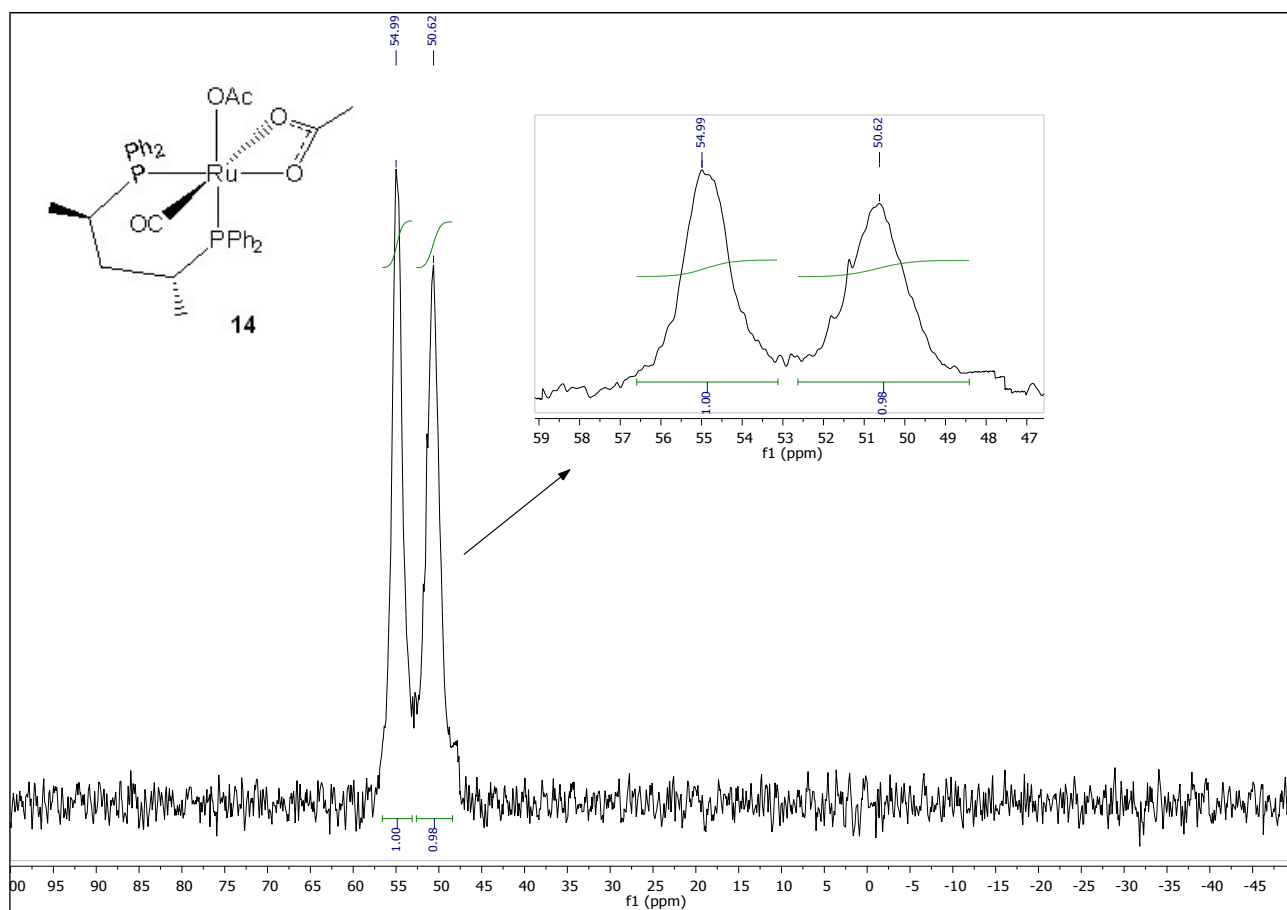

**Figure S55.**  $^{31}\text{P}\{^1\text{H}\}$  NMR spectrum (81.0 MHz) of  $[\text{Ru}(\text{OAc})_2(\text{CO})((R,R)\text{-Skewphos})]$  (**14**) in  $\text{CD}_2\text{Cl}_2$  at 20 °C.

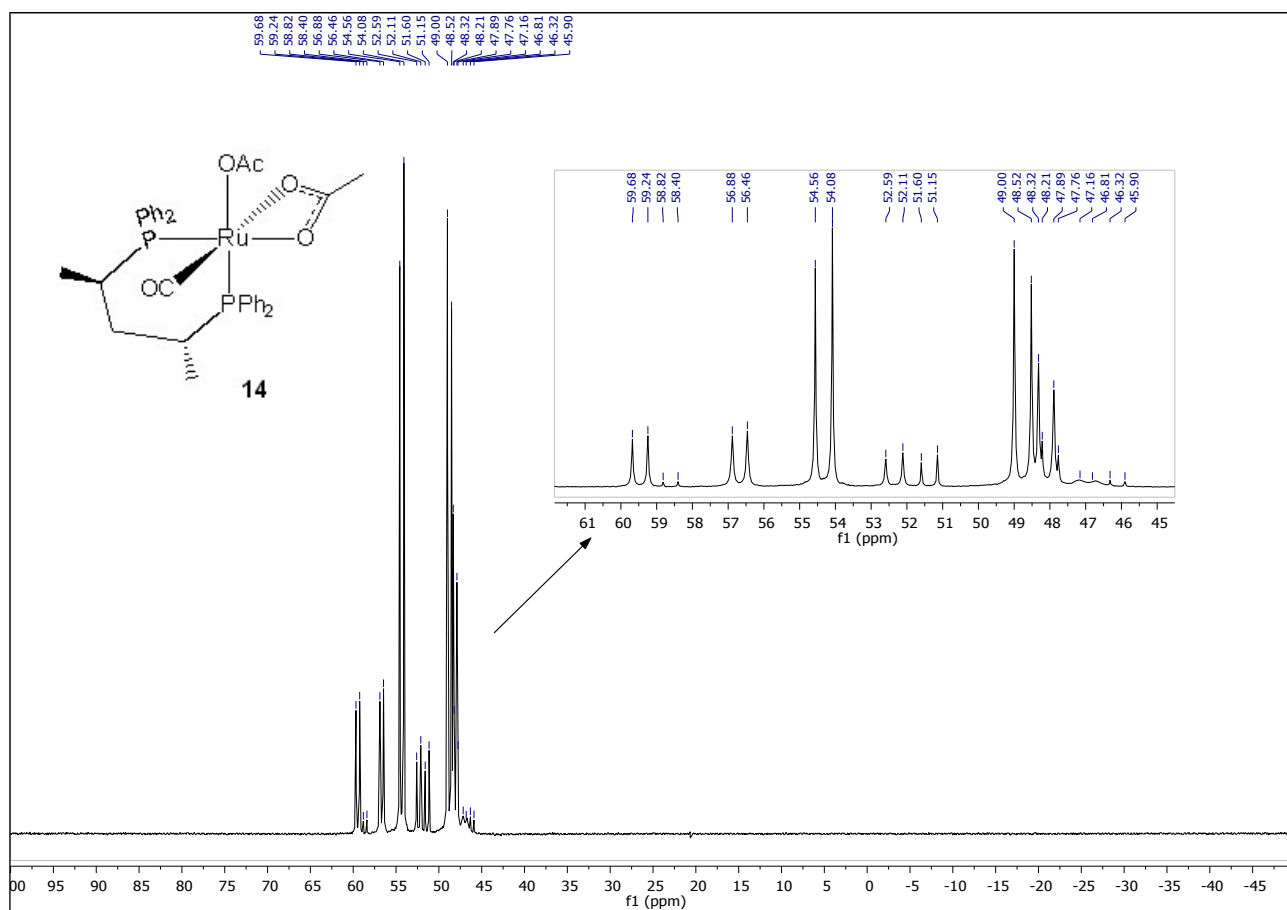

**Figure S56.**  $^{31}\text{P}\{^1\text{H}\}$  NMR spectrum (81.0 MHz) of  $[\text{Ru}(\text{OAc})_2(\text{CO})((R,R)\text{-Skewphos})]$  (**14**) in  $\text{CD}_2\text{Cl}_2$  at  $-60\text{ }^\circ\text{C}$ .

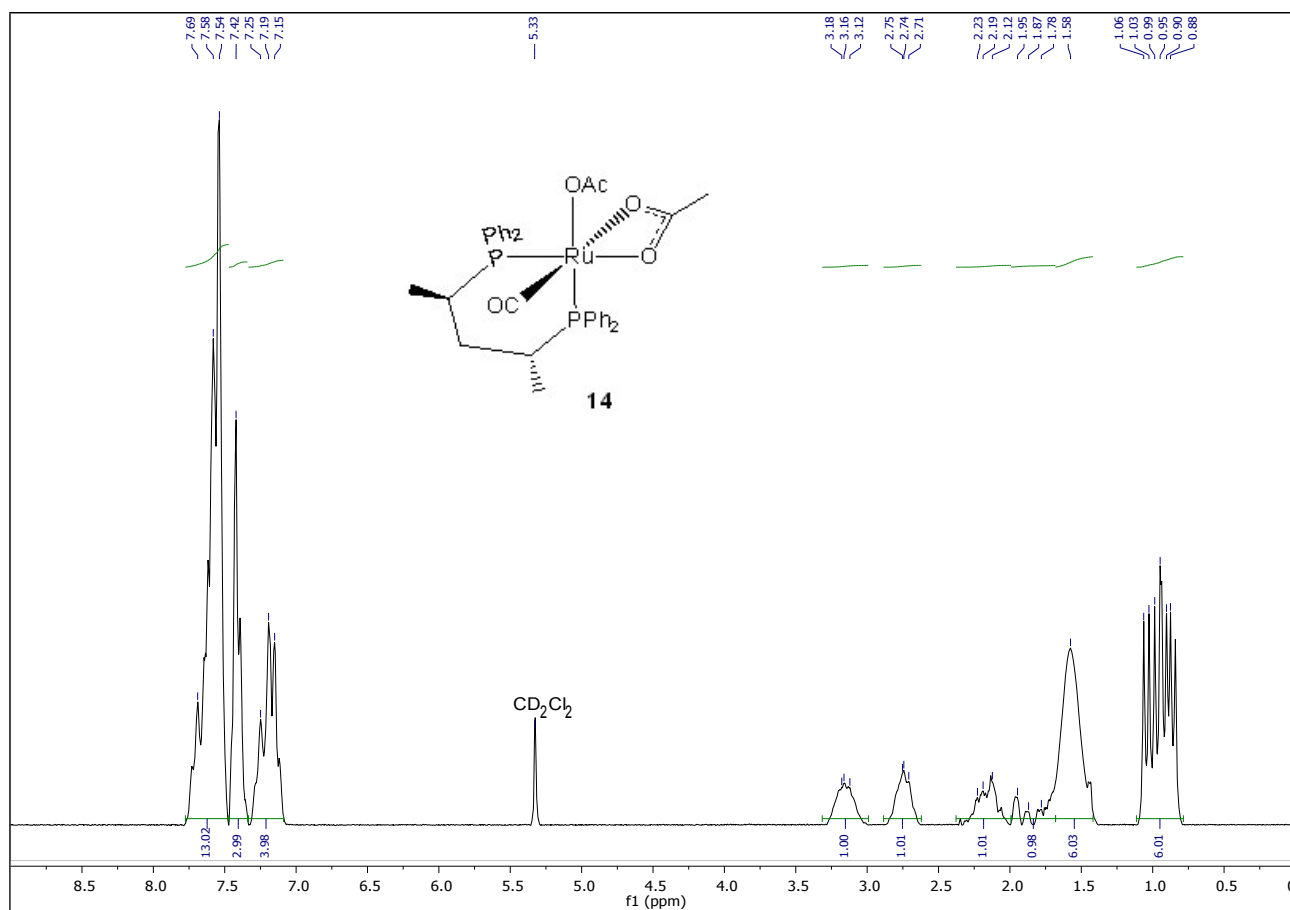

**Figure S57.**  $^1\text{H}$  NMR spectrum (200.1 MHz) of  $[\text{Ru}(\text{OAc})_2(\text{CO})((R,R)\text{-Skewphos})]$  (**14**) in  $\text{CD}_2\text{Cl}_2$  at  $20^\circ\text{C}$ .

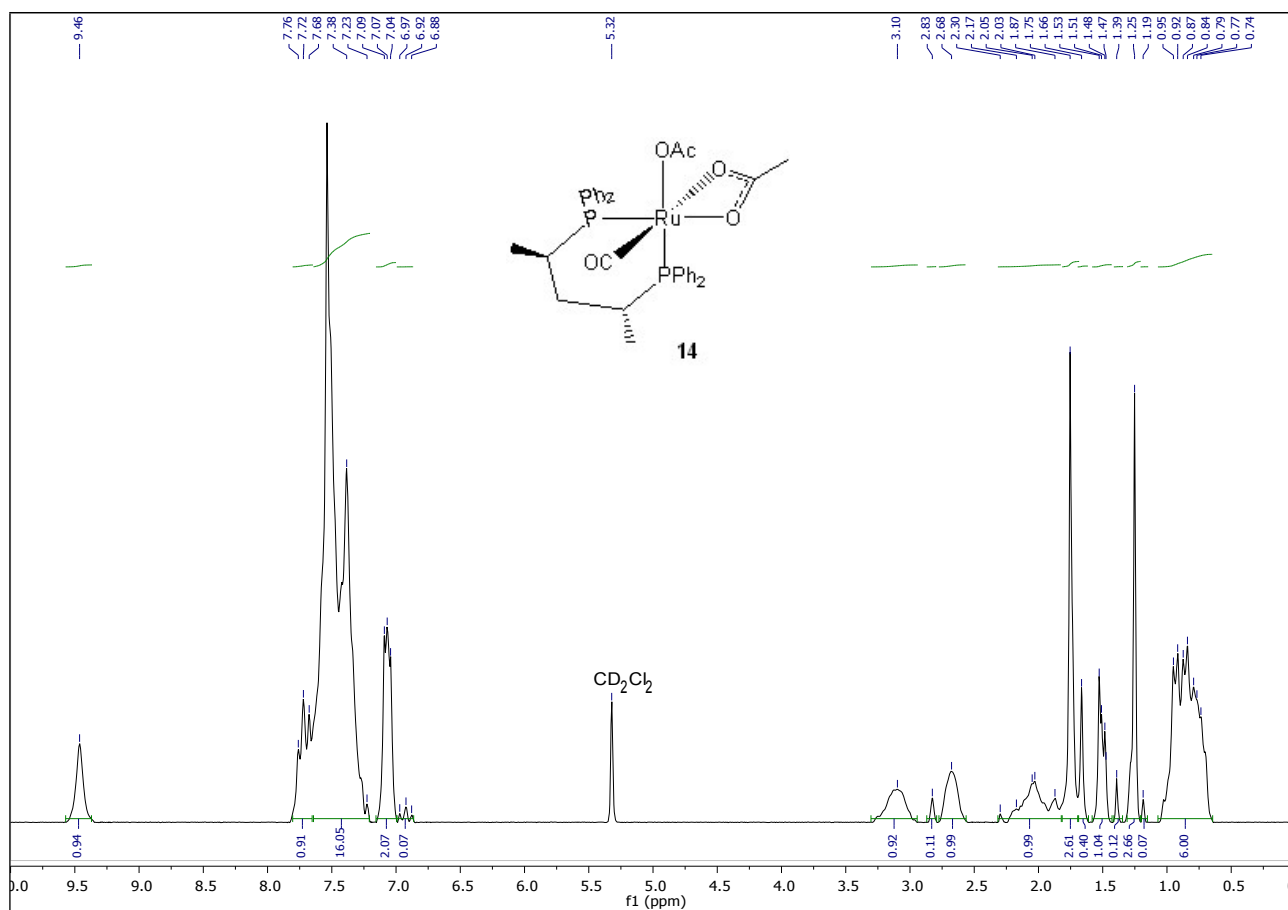

**Figure S58.** <sup>1</sup>H NMR spectrum (200.1 MHz) of [Ru(OAc)<sub>2</sub>(CO)((*R,R*)-Skewphos)] (**14**) in CD<sub>2</sub>Cl<sub>2</sub> at -60 °C.

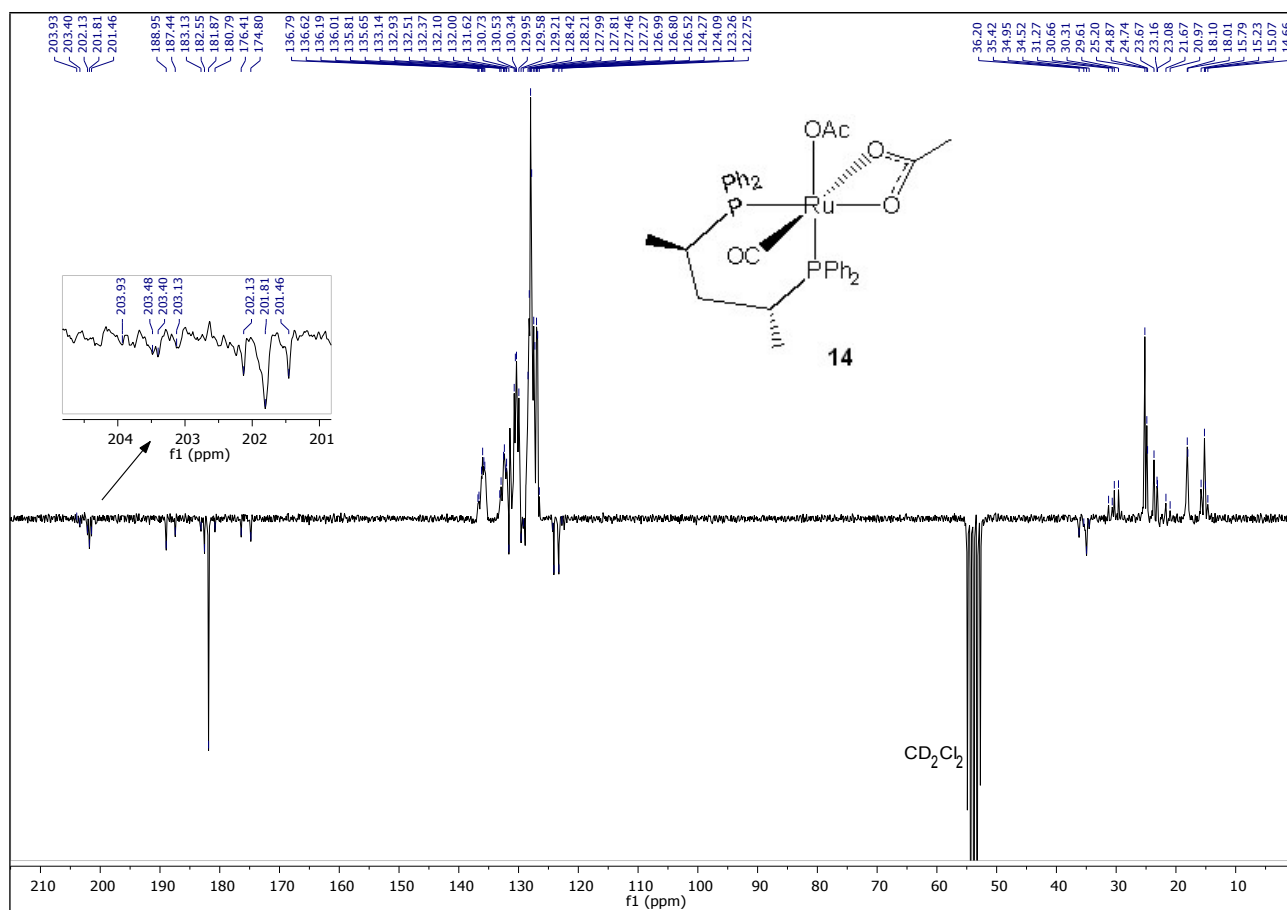

**Figure S59.**  $^{13}\text{C}\{^1\text{H}\}$  PENDANT NMR spectrum (50.3 MHz) of  $[\text{Ru}(\text{OAc})_2(\text{CO})((R,R)\text{-Skewphos})]$  (**14**) in  $\text{CD}_2\text{Cl}_2$  at  $-60\text{ }^\circ\text{C}$ .



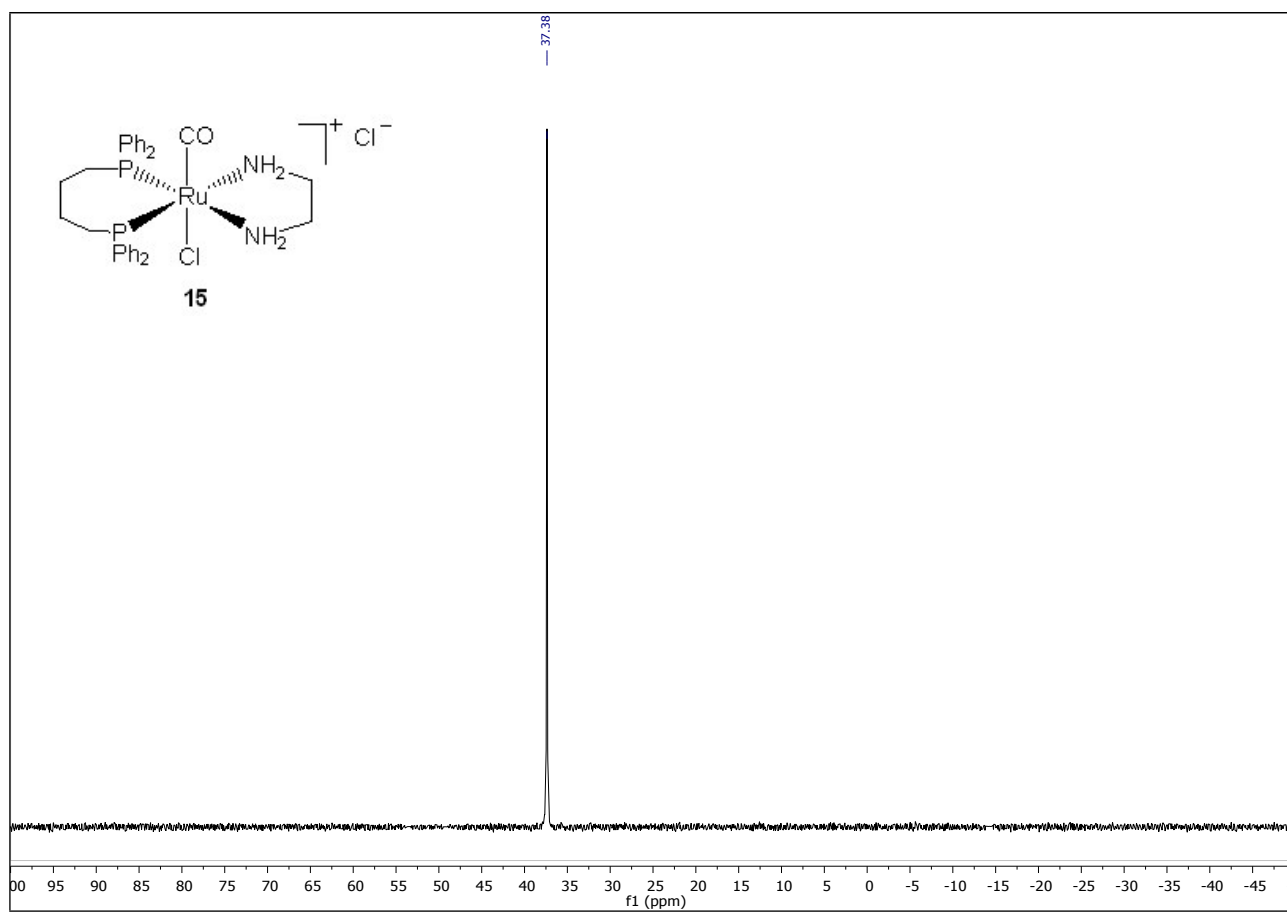

**Figure S60.**  $^{31}\text{P}\{^1\text{H}\}$  NMR spectrum (81.0 MHz) of  $[\text{RuCl}(\text{CO})(\text{dppb})(\text{en})]\text{Cl}$  (**15**) in  $\text{CD}_2\text{Cl}_2$  at  $20^\circ\text{C}$ .

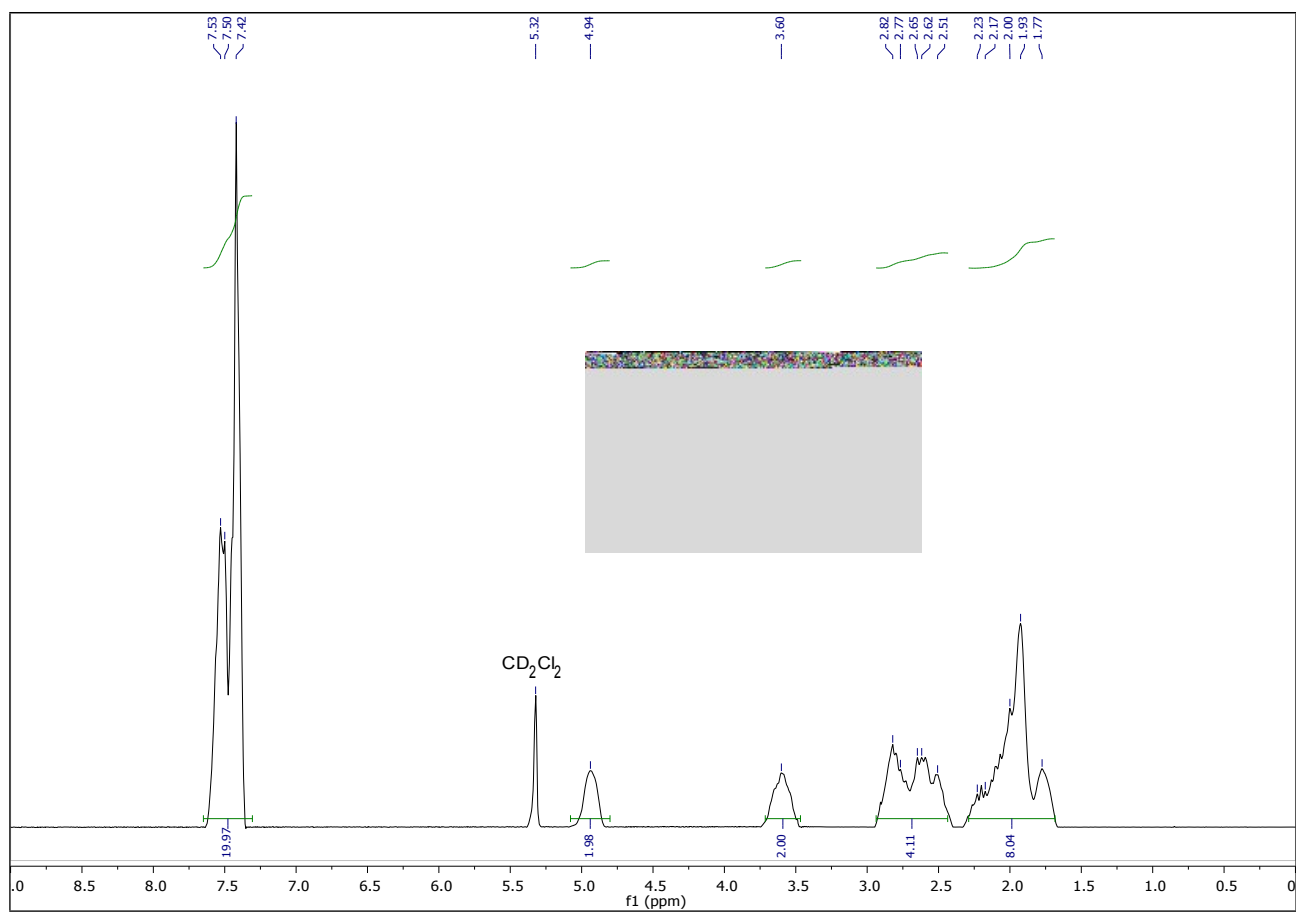

**Figure S61.**  $^1\text{H}$  NMR spectrum (200.1 MHz) of  $[\text{RuCl}(\text{CO})(\text{dppb})(\text{en})]\text{Cl}$  (**15**) in  $\text{CD}_2\text{Cl}_2$  at  $20\text{ }^\circ\text{C}$ .

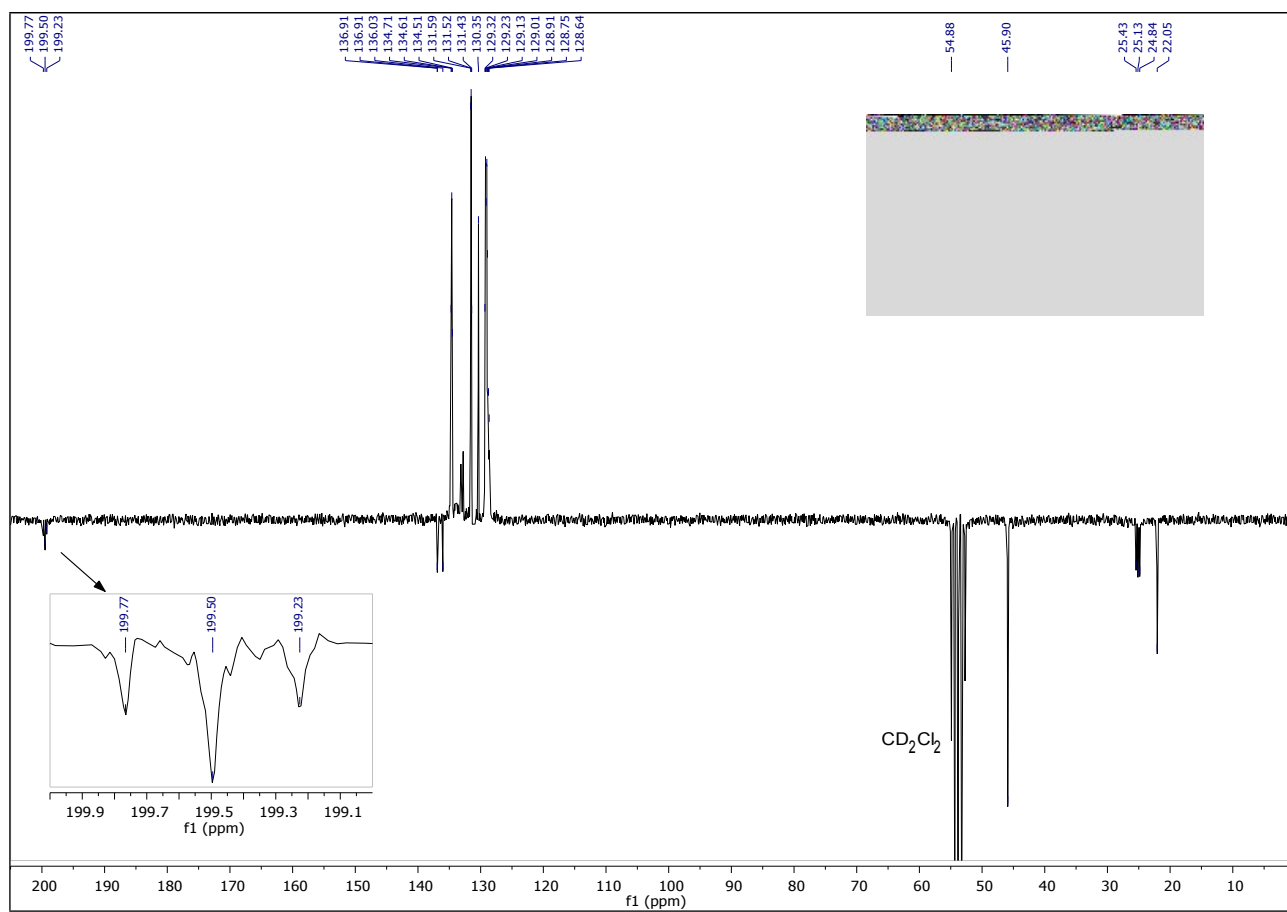

**Figure S62.**  $^{13}\text{C}\{^1\text{H}\}$  PENDANT NMR spectrum (50.3 MHz) of  $[\text{RuCl}(\text{CO})(\text{dppb})(\text{en})]\text{Cl}$  (**15**) in  $\text{CD}_2\text{Cl}_2$  at  $20^\circ\text{C}$

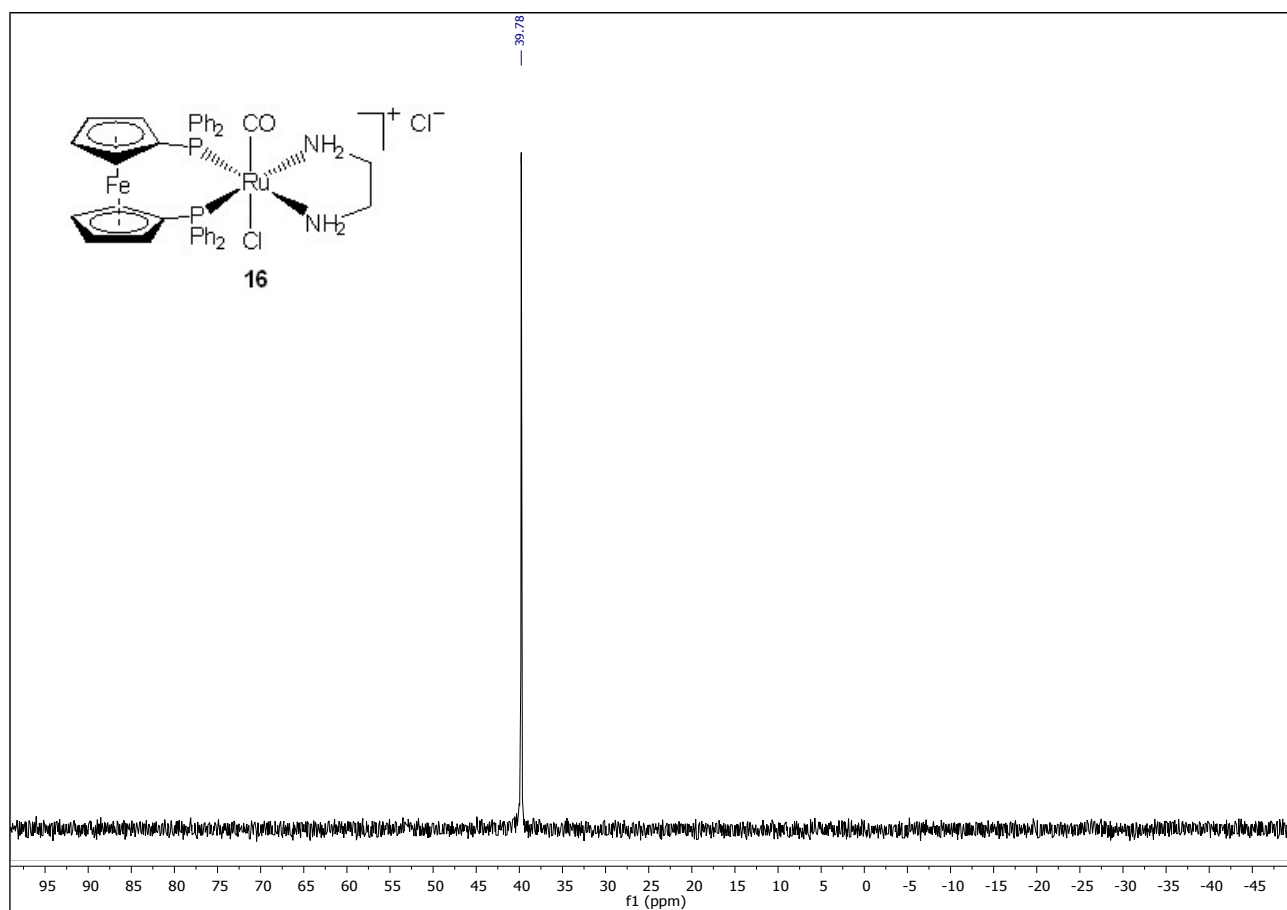

**Figure S63.**  $^{31}\text{P}\{^1\text{H}\}$  NMR spectrum (81.0 MHz) of  $[\text{RuCl}(\text{CO})(\text{dppf})(\text{en})]\text{Cl}$  (**16**) in  $\text{CD}_2\text{Cl}_2$  at 20 °C.

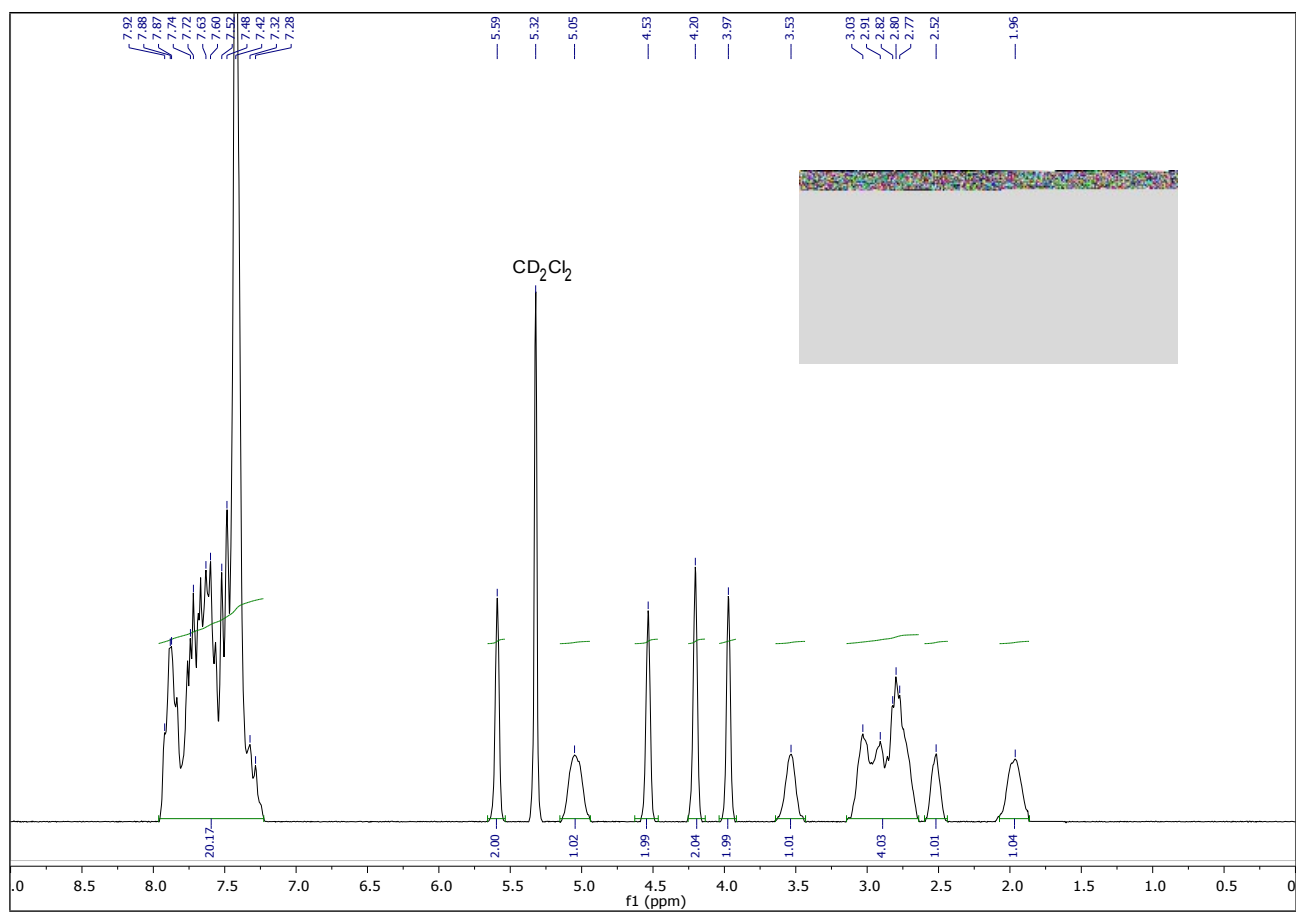

**Figure S64.** <sup>1</sup>H NMR spectrum (200.1 MHz) of [RuCl(CO)(dppf)(en)]Cl (**16**) in CD<sub>2</sub>Cl<sub>2</sub> at 20 °C.

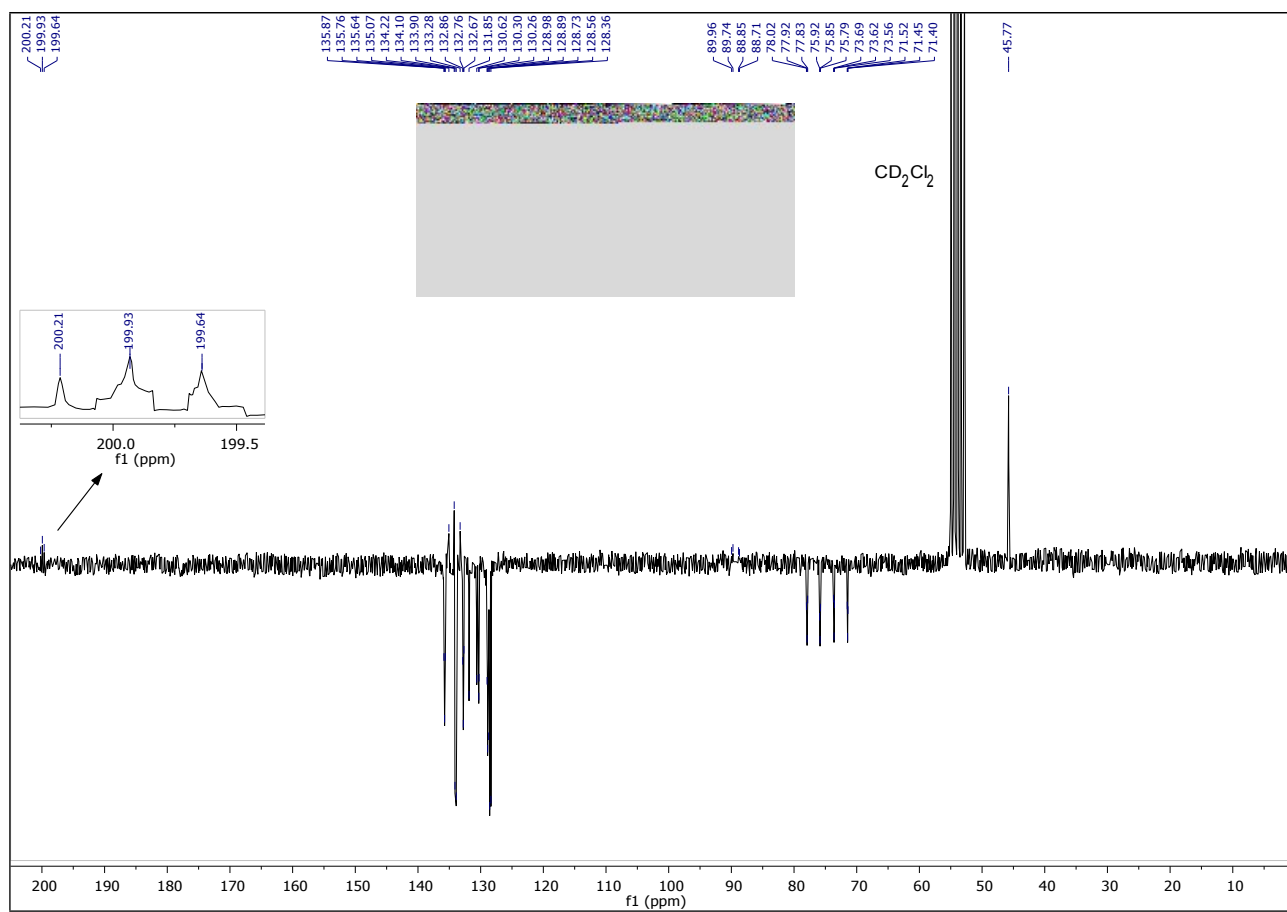

**Figure S65.**  $^{13}\text{C}\{^1\text{H}\}$  PENDANT NMR spectrum (50.3 MHz) of  $[\text{RuCl}(\text{CO})(\text{dppf})(\text{en})]\text{Cl}$  (16) in  $\text{CD}_2\text{Cl}_2$  at  $20^\circ\text{C}$ .

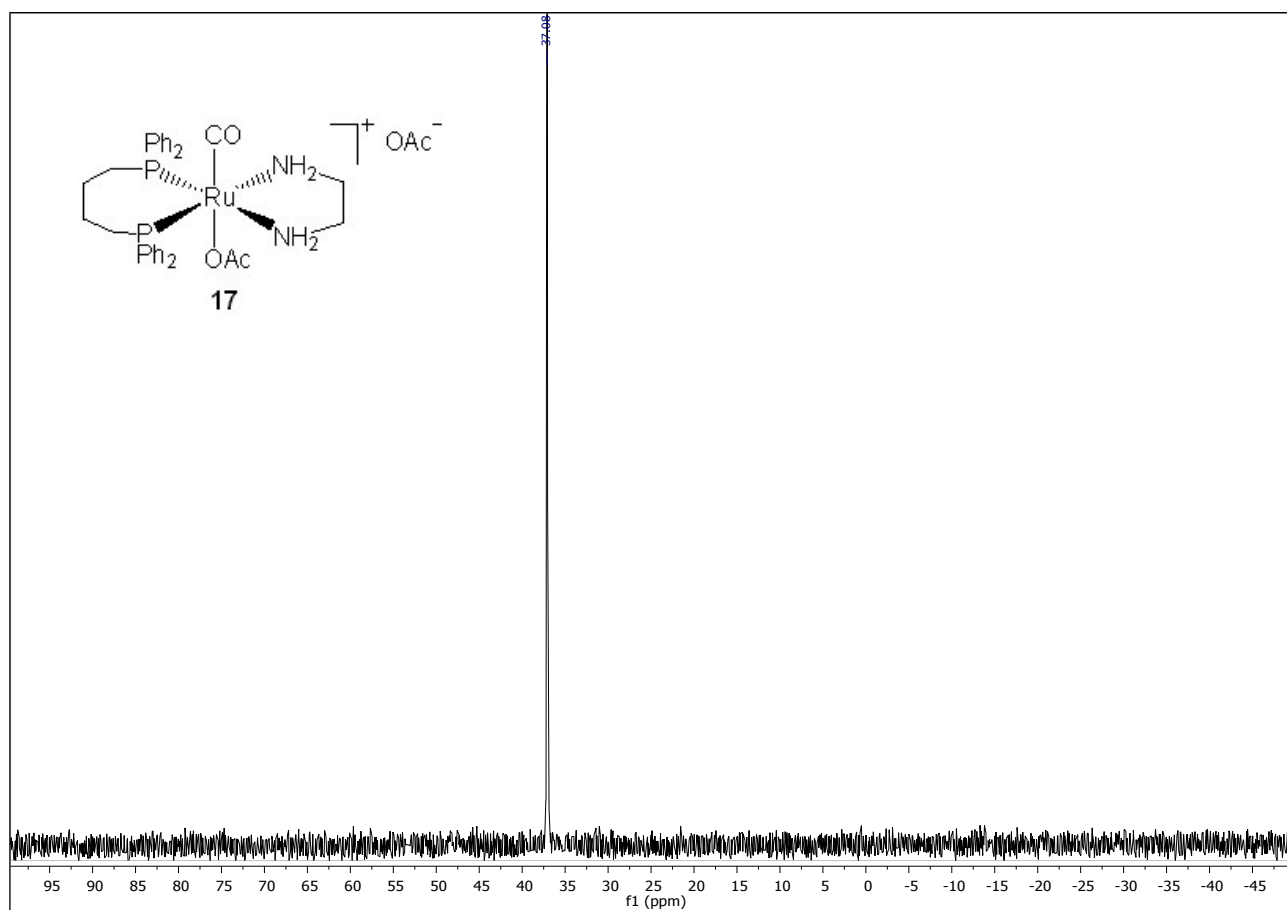

**Figure S66.**  $^{31}\text{P}\{^1\text{H}\}$  NMR spectrum (81.0 MHz) of  $[\text{Ru}(\text{OAc})(\text{CO})(\text{dppb})(\text{en})]\text{OAc}$  (**17**) in  $\text{CD}_3\text{OD}$  at  $20^\circ\text{C}$ .

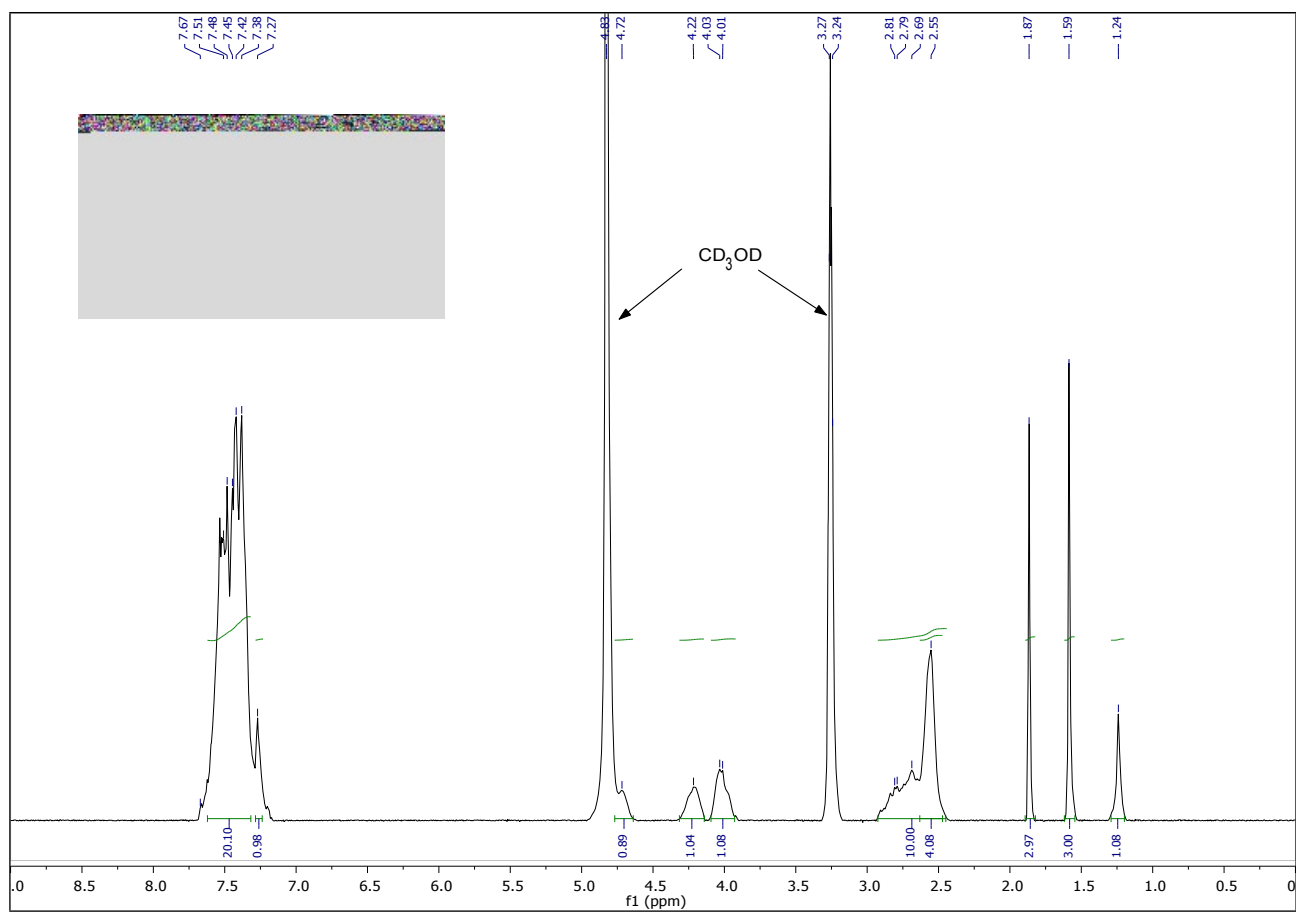

**Figure S67.**  $^1\text{H}$  NMR spectrum (200.1 MHz) of  $[\text{Ru}(\text{OAc})(\text{CO})(\text{dppb})(\text{en})]\text{OAc}$  (**17**) in  $\text{CD}_3\text{OD}$  at  $20\text{ }^\circ\text{C}$ .



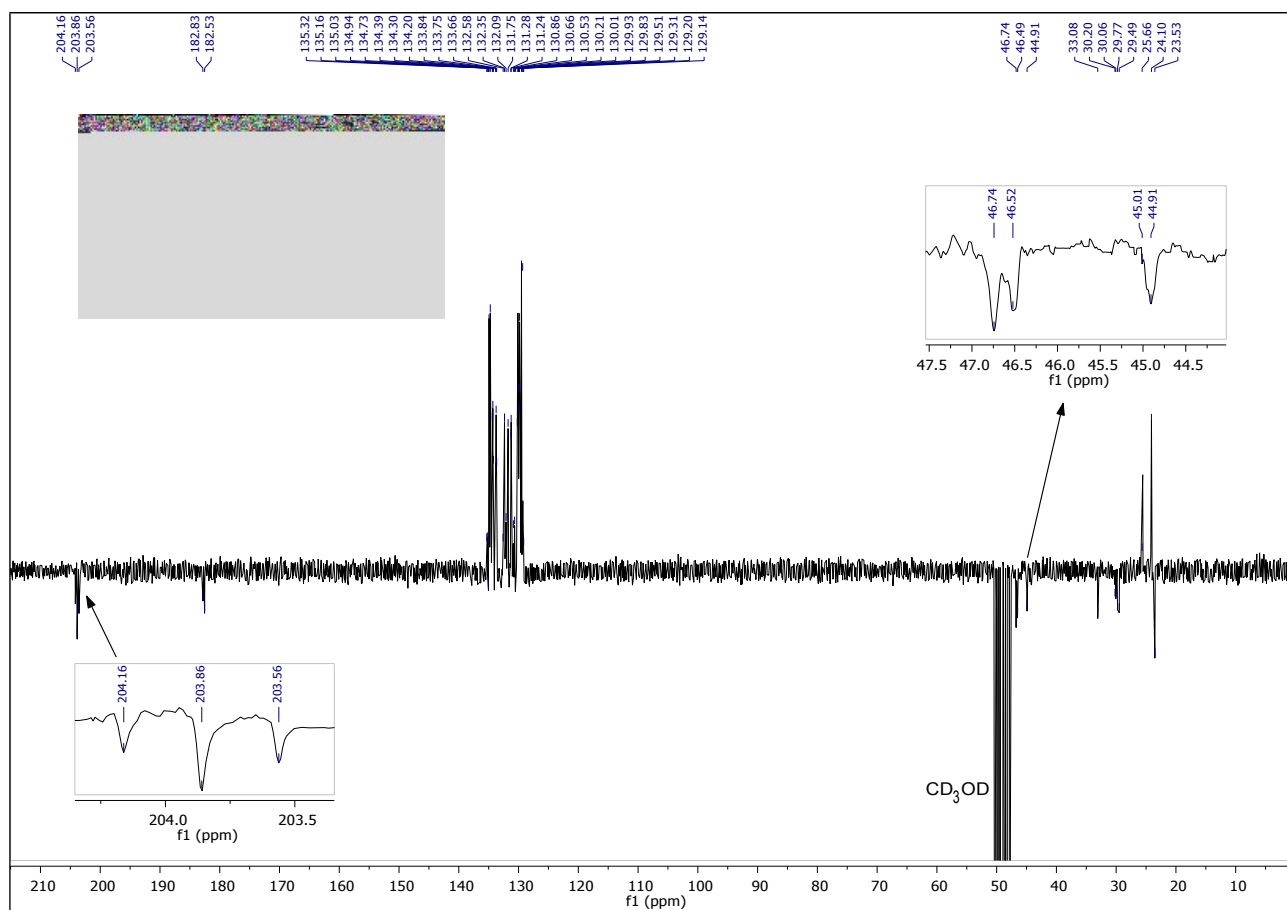

**Figure S68.**  $^{13}\text{C}\{^1\text{H}\}$  PENDANT NMR spectrum (50.3 MHz) of  $[\text{Ru}(\text{OAc})(\text{CO})(\text{dppb})(\text{en})]\text{OAc}$  (17) in  $\text{CD}_3\text{OD}$  at  $20^\circ\text{C}$ .

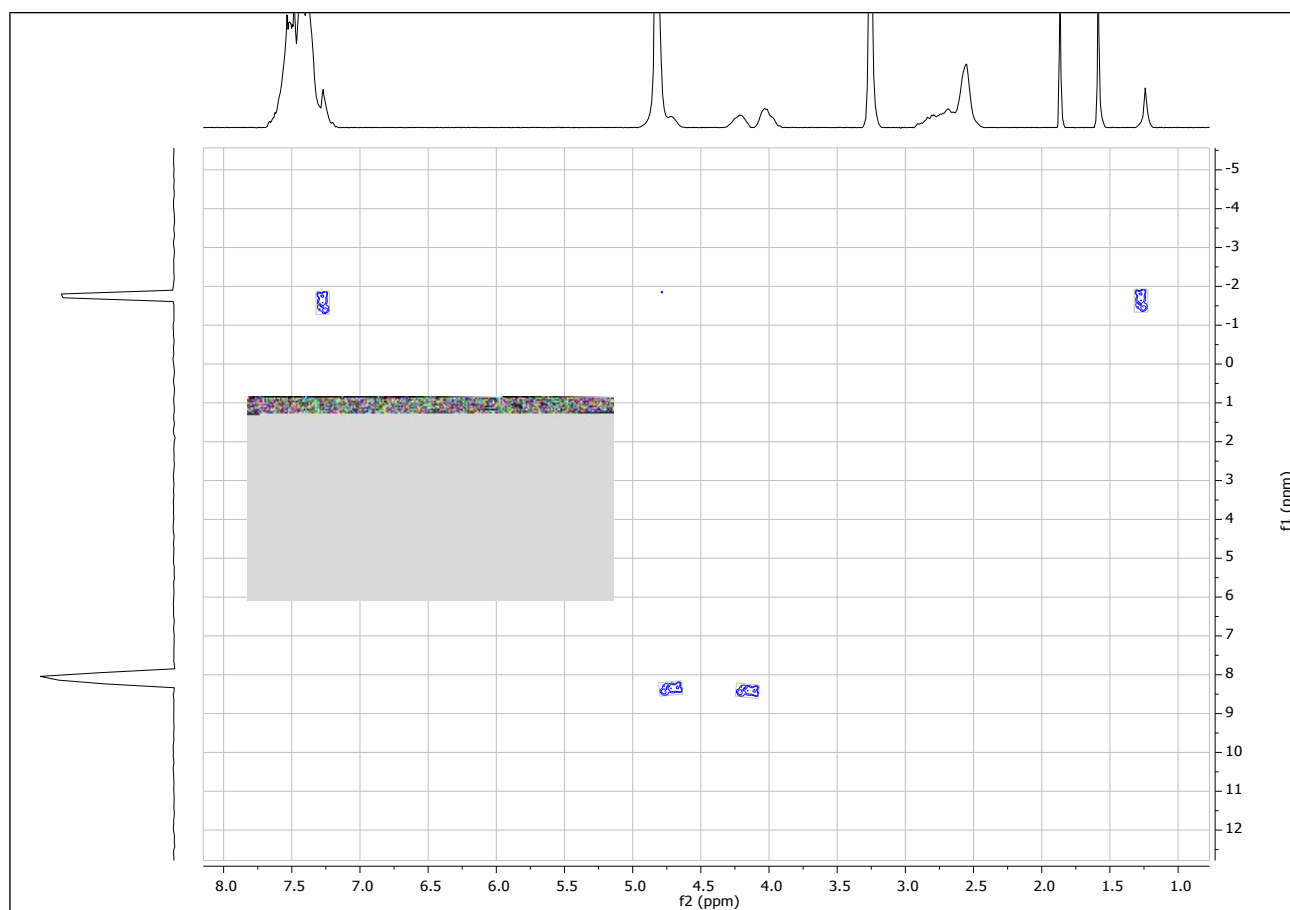

**Figure S69.**  $^{15}\text{N}$ - $^1\text{H}$  HSQC 2D NMR spectrum of  $[\text{Ru}(\text{OAc})(\text{CO})(\text{dppb})(\text{en})]\text{OAc}$  (**17**) in  $\text{CD}_3\text{OD}$  at  $20\text{ }^\circ\text{C}$ .

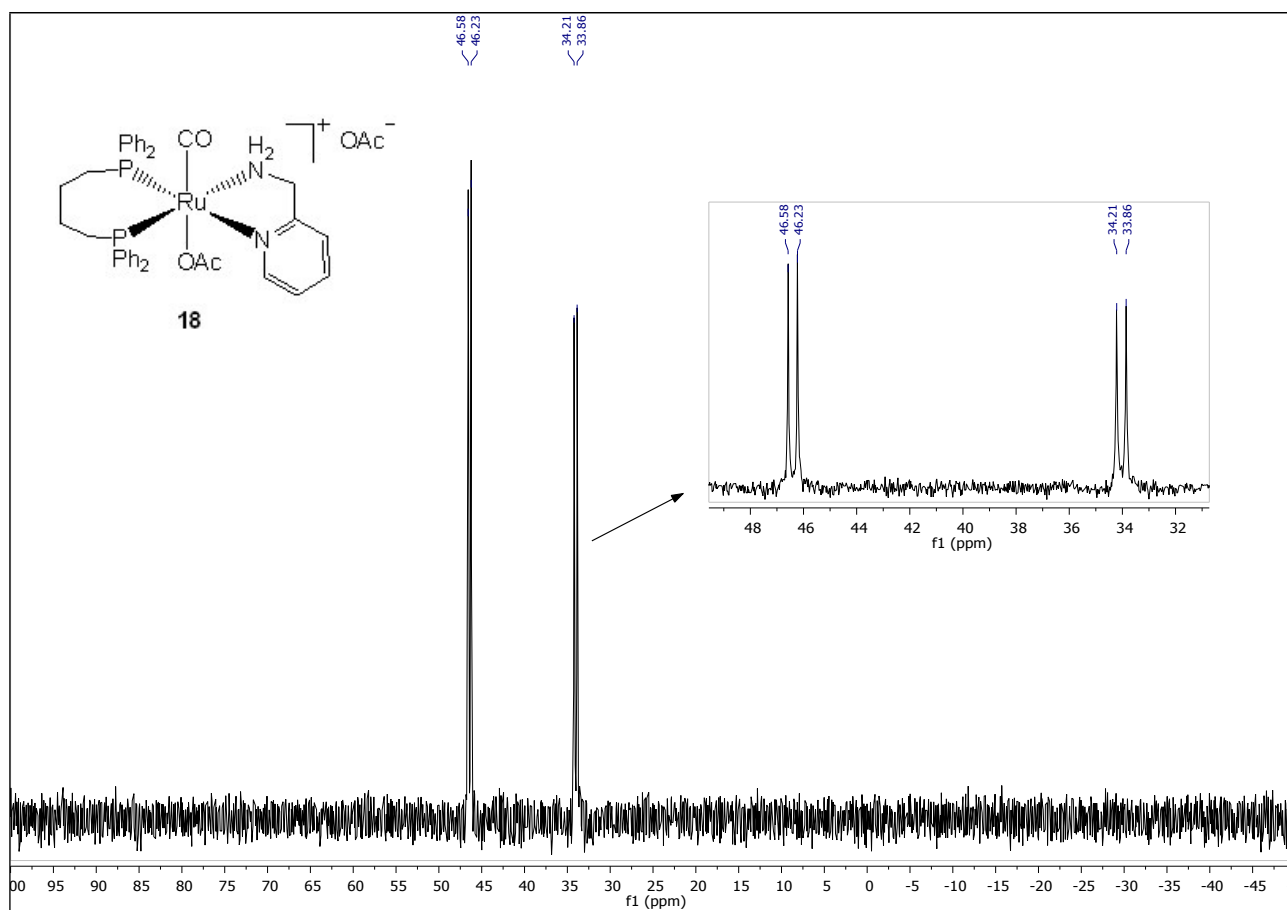

**Figure S70.**  $^{31}\text{P}\{^1\text{H}\}$  NMR spectrum (81.0 MHz) of  $[\text{Ru}(\text{OAc})(\text{CO})(\text{dppb})(\text{ampy})]\text{OAc}$  (**18**) in  $[\text{D}_8]\text{toluene}$  at  $20\text{ }^\circ\text{C}$ .

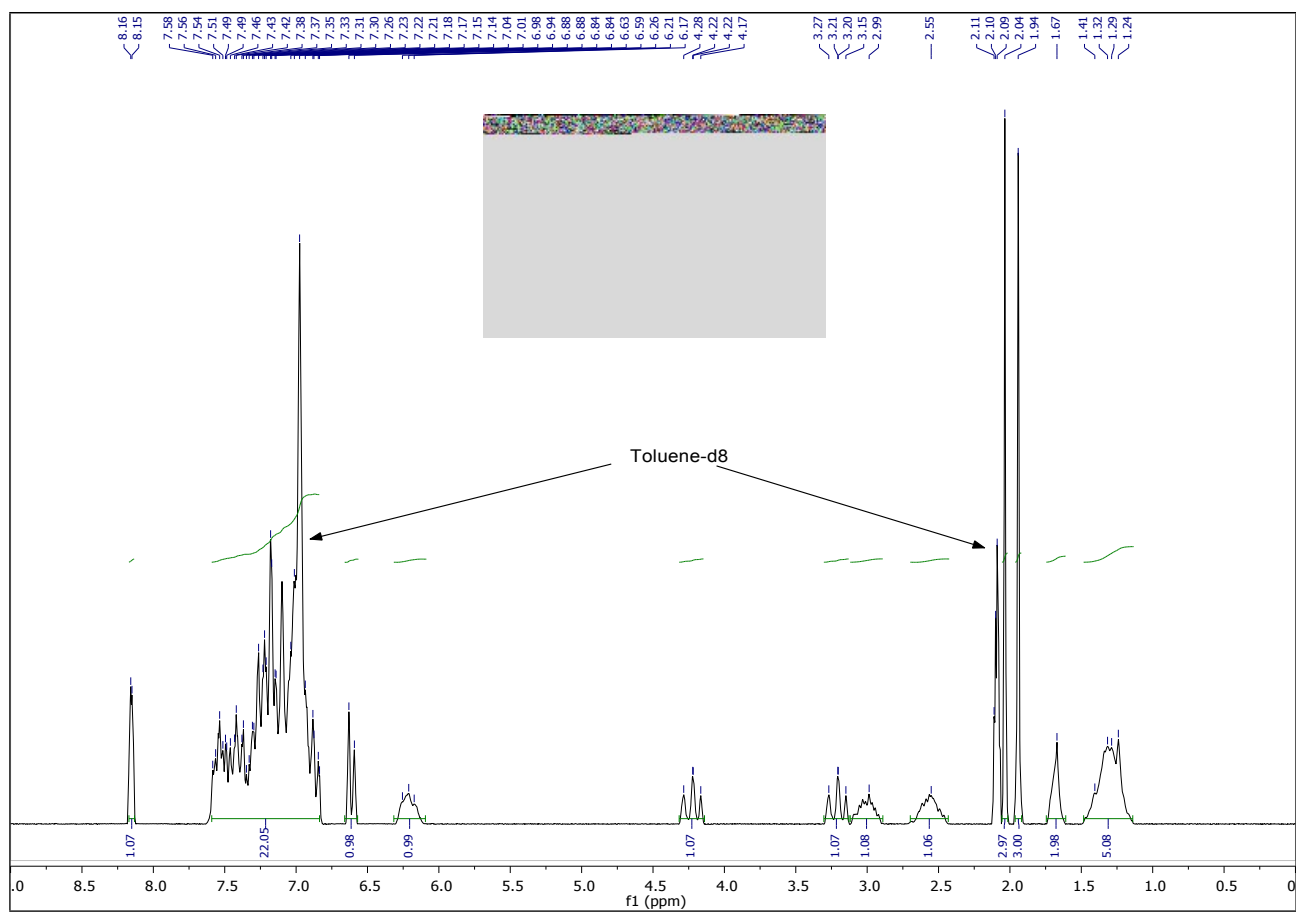

**Figure S71.** <sup>1</sup>H NMR spectrum (200.1 MHz) of [Ru(OAc)(CO)(dppb)(ampy)]OAc (**18**) in [D8]toluene at 20 °C.

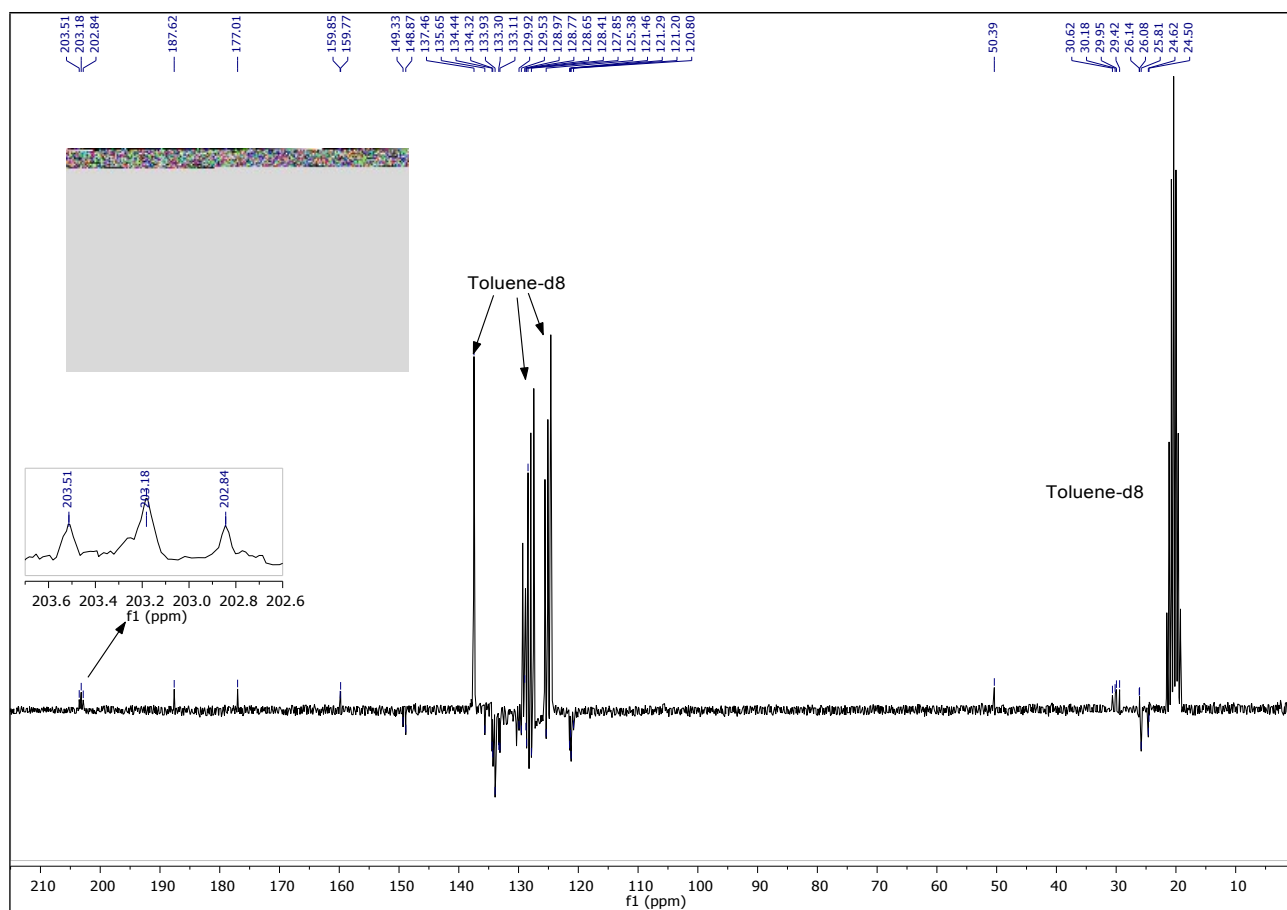

**Figure S72.**  $^{13}\text{C}\{^1\text{H}\}$  PENDANT NMR spectrum (50.3 MHz) of  $[\text{Ru}(\text{OAc})(\text{CO})(\text{dppb})(\text{ampy})]\text{OAc}$  (**18**) in  $[\text{D}_8]\text{toluene}$  at  $20\text{ }^\circ\text{C}$ .

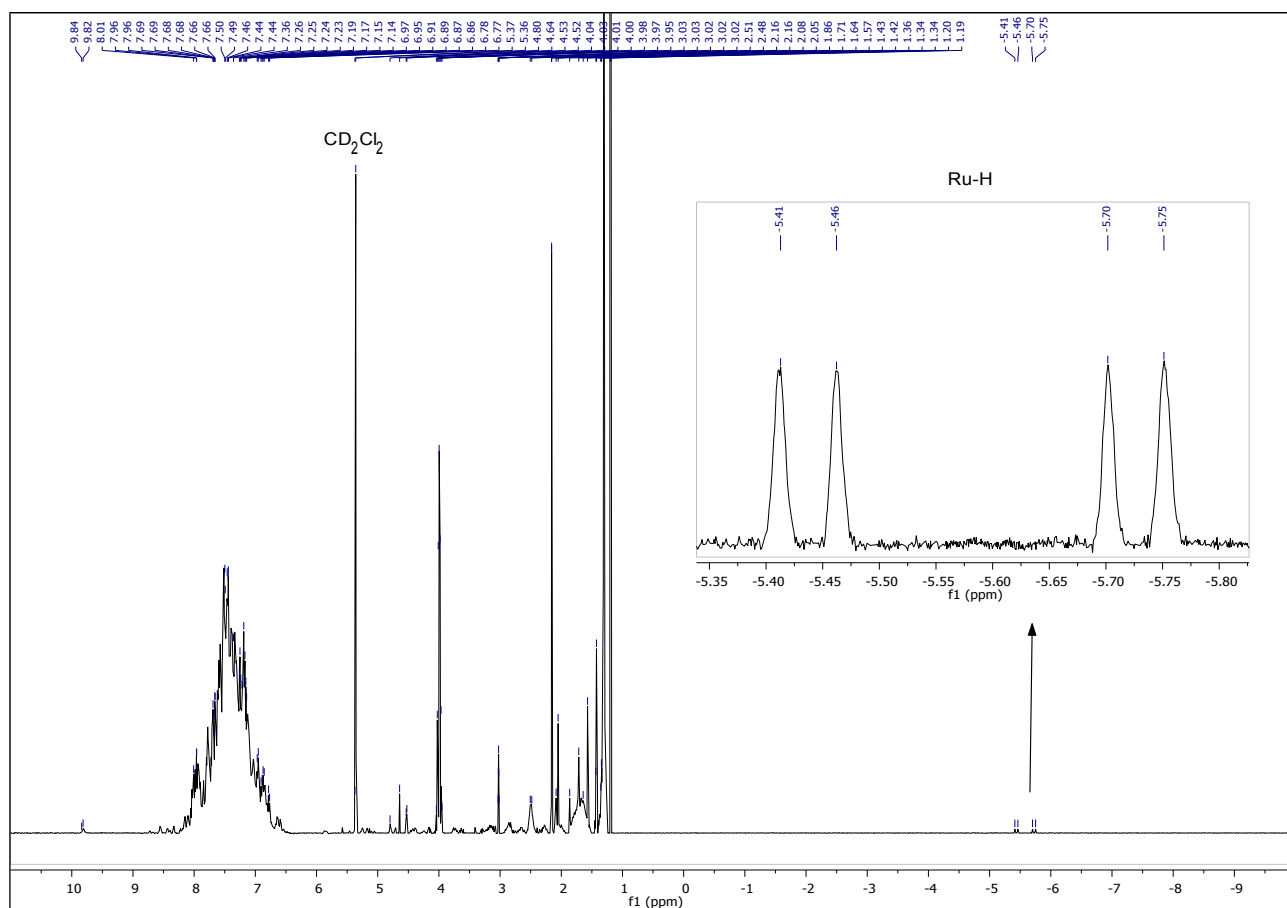

**Figure S73.**  $^1\text{H}$  NMR spectrum (400.1 MHz,  $\text{CD}_2\text{Cl}_2$ , 20 °C) which evidences of the formation of a ruthenium monohydride species from  $[\text{Ru}(\text{OAc})(\text{CO})(\text{dppb})(\text{ampy})]\text{OAc}$  (**18**), by treatment with 2 eq. of  $\text{NaOiPr}$  in 2-propanol.

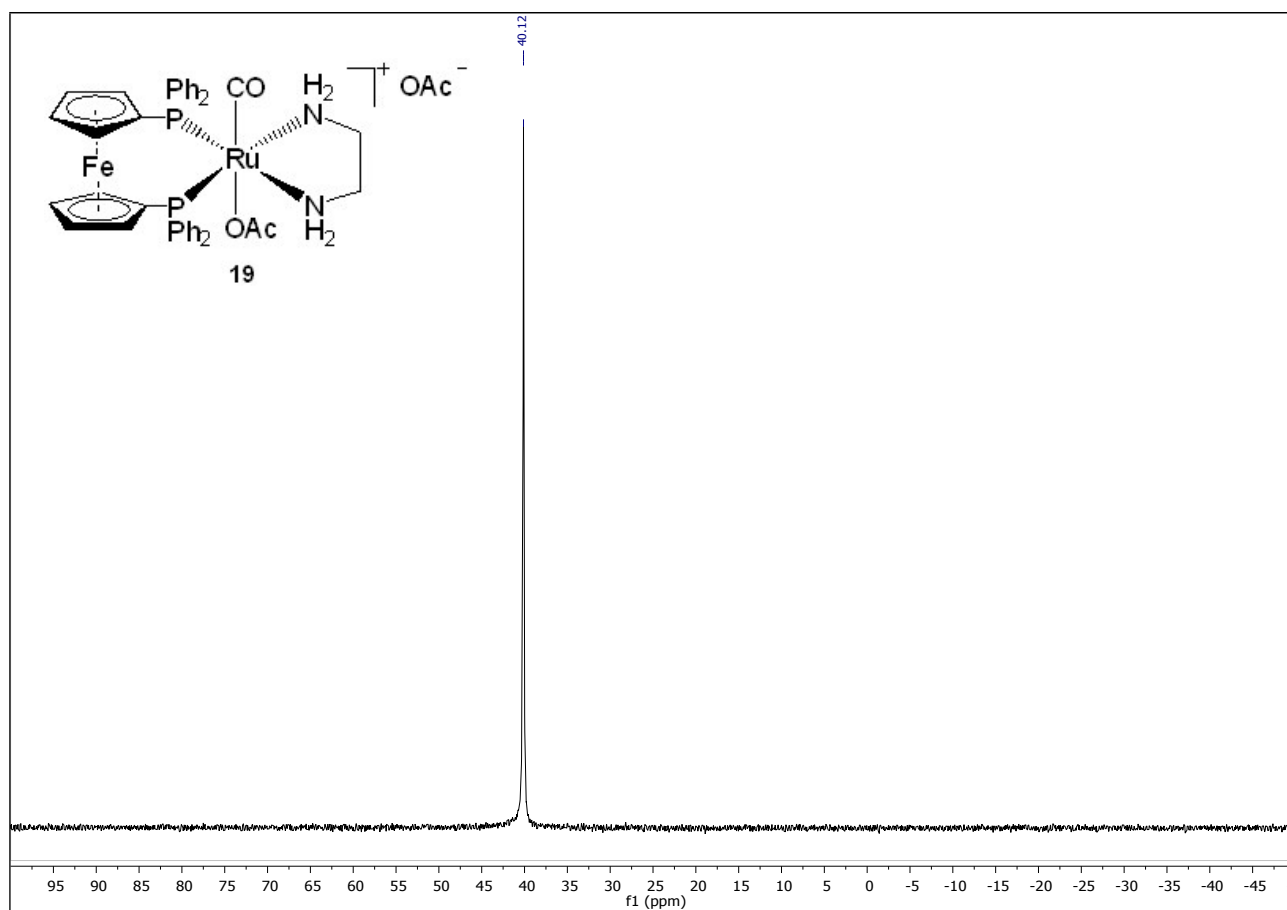

**Figure S74.**  $^{31}\text{P}\{^1\text{H}\}$  NMR spectrum (81.0 MHz) of  $[\text{Ru}(\text{OAc})(\text{CO})(\text{dppf})(\text{en})]\text{OAc}$  (**19**) in  $\text{CD}_2\text{Cl}_2$  at 20 °C.

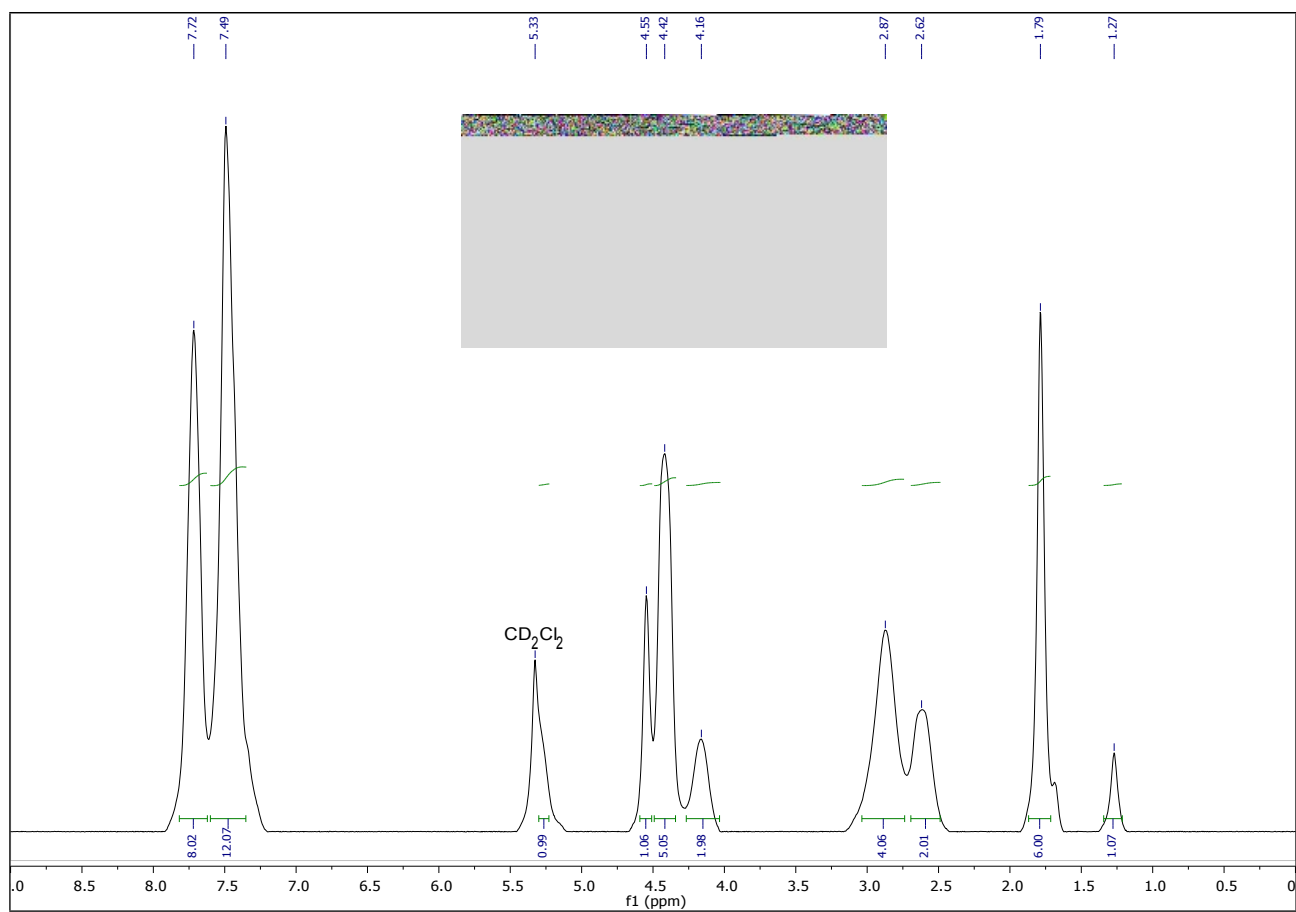

**Figure S75.** <sup>1</sup>H NMR spectrum (200.1 MHz) of [Ru(OAc)(CO)(dppf)(en)]OAc (**19**) in CD<sub>2</sub>Cl<sub>2</sub> at 20 °C.



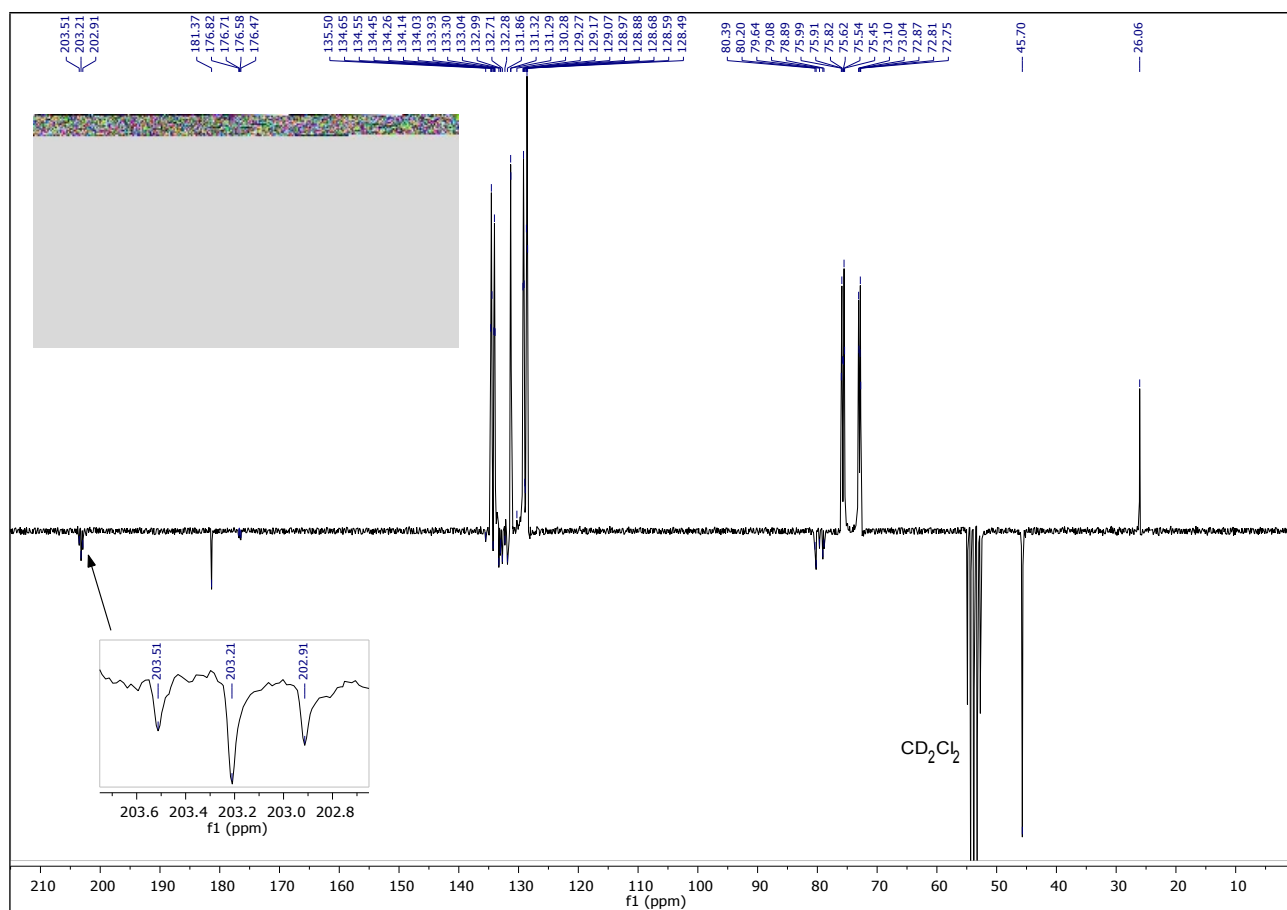

**Figure S76.**  $^{13}\text{C}\{^1\text{H}\}$  PENDANT NMR spectrum (50.3 MHz) of  $[\text{Ru}(\text{OAc})(\text{CO})(\text{dppf})(\text{en})]\text{OAc}$  (**19**) in  $\text{CD}_2\text{Cl}_2$  at  $20\text{ }^\circ\text{C}$ .

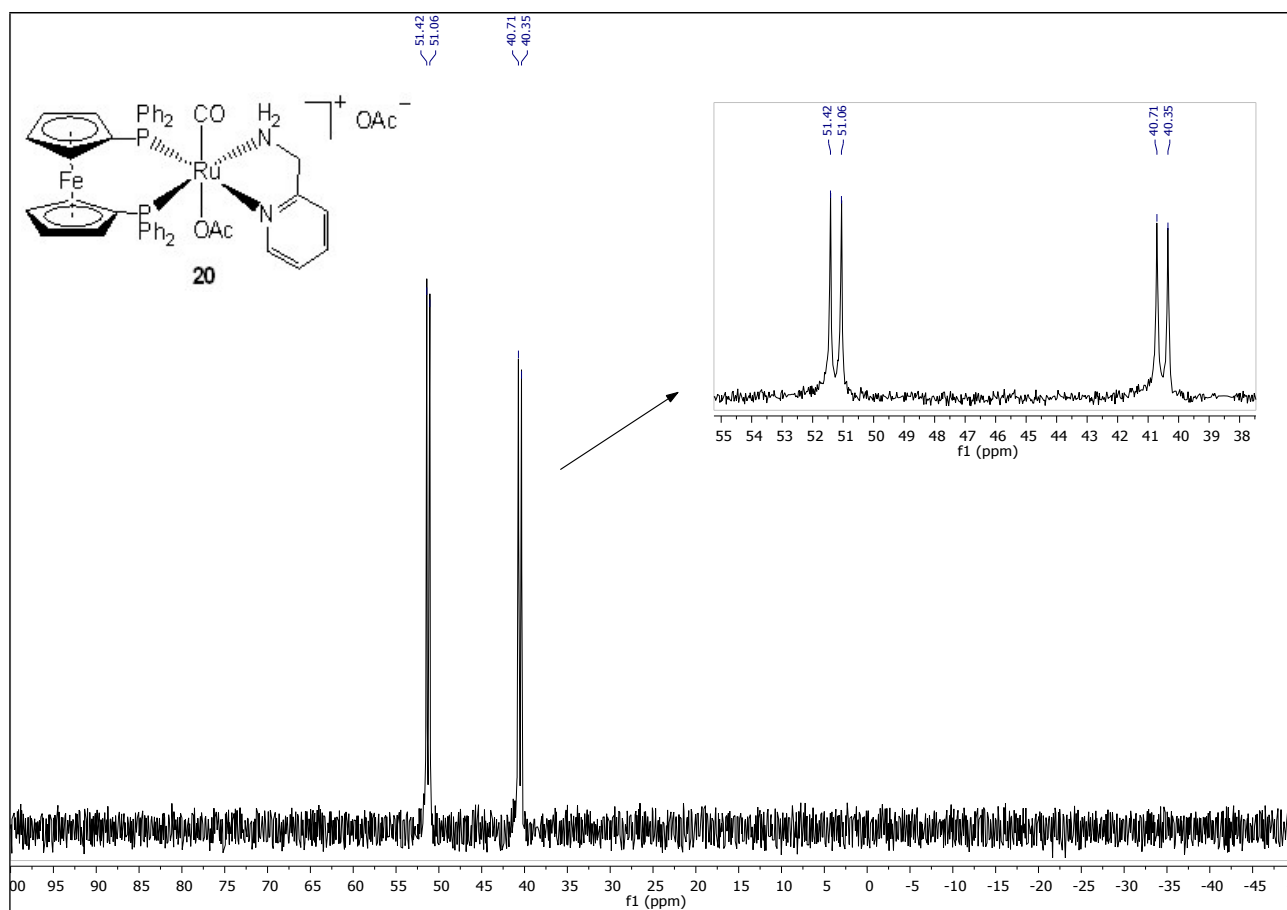

**Figure S77.**  $^{31}\text{P}\{^1\text{H}\}$  NMR spectrum (81.0 MHz) of  $[\text{Ru}(\text{OAc})(\text{CO})(\text{dppf})(\text{ampy})]\text{OAc}$  (**20**) in  $[\text{D}_8]\text{toluene}$  at 20 °C.

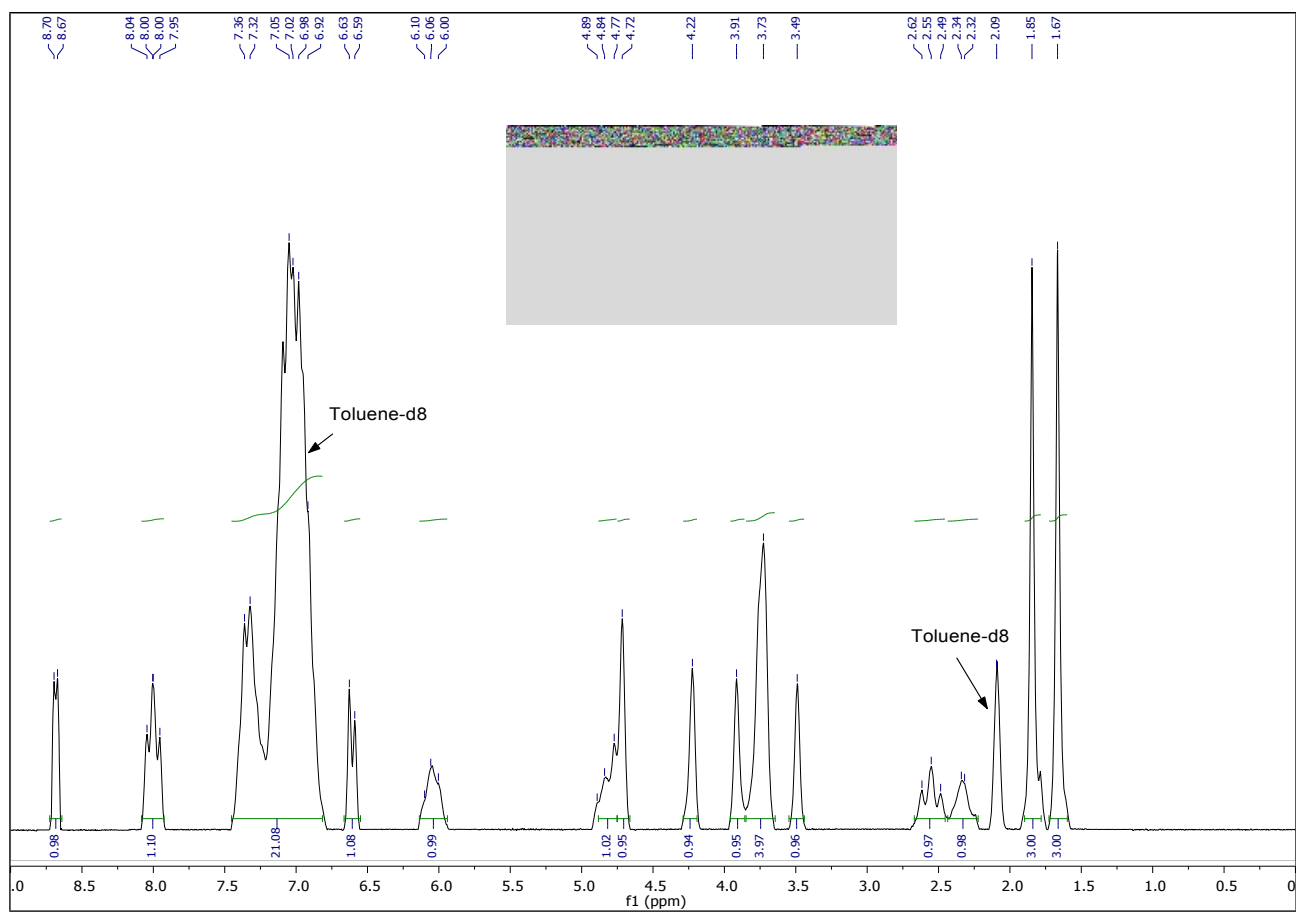

**Figure S78.** <sup>1</sup>H NMR spectrum (200.1 MHz) of [Ru(OAc)(CO)(dppf)(ampy)]OAc (**20**) in [D<sub>8</sub>]toluene at 20 °C.

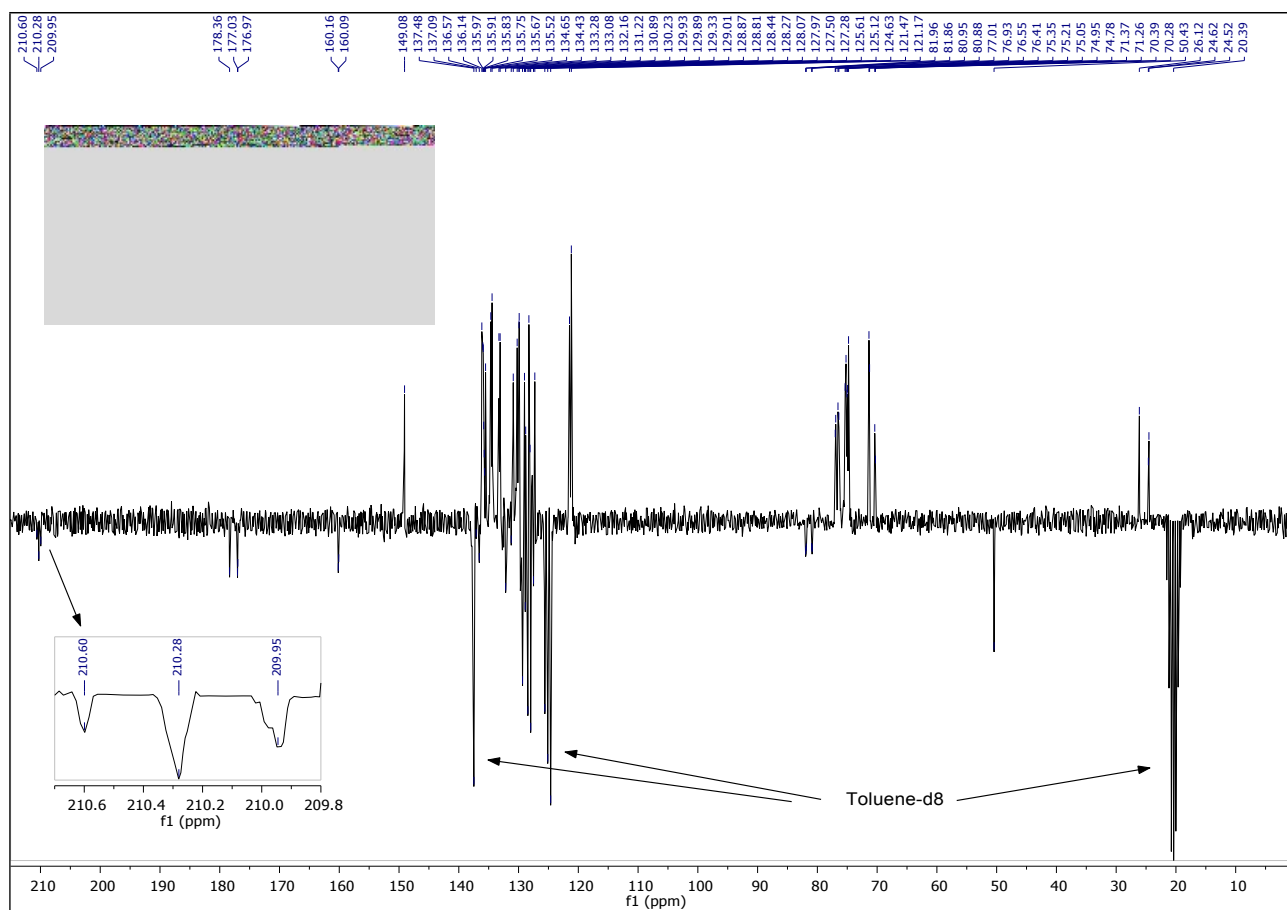

**Figure S79.**  $^{13}\text{C}\{^1\text{H}\}$  NMR spectrum (81.0 MHz) of  $[\text{Ru}(\text{OAc})(\text{CO})(\text{dppf})(\text{ampy})]\text{OAc}$  (**20**) in  $[\text{D}_8]\text{toluene}$  at  $20\text{ }^\circ\text{C}$ .

**Table S1.** Further data regarding the catalytic TH of acetophenone (0.1 M) with complexes **6-14** (S/C 1000) in 2-propanol at 82 °C, and in the presence of NaOiPr 2 mol%.

| Entry | Complex   | Ligand<br>(5 equiv.)                 | Time [min] | Conv. <sup>[a]</sup><br>[%] | TOF <sup>[b]</sup><br>[h <sup>-1</sup> ] | e.e.<br>(%)     |
|-------|-----------|--------------------------------------|------------|-----------------------------|------------------------------------------|-----------------|
| 1     | <b>6</b>  | en                                   | 120        | 25                          | -                                        | -               |
| 2     | <b>7</b>  | en                                   | 120        | 44                          | -                                        | -               |
| 3     | <b>8</b>  | en                                   | 120        | 92                          | 900                                      | 22 ( <i>S</i> ) |
| 4     | <b>8</b>  | ampy                                 | 300        | 88                          | 300                                      | 18 ( <i>S</i> ) |
| 5     | <b>8</b>  | (±)- <i>i</i> Pr-ampy <sup>[c]</sup> | 120        | 97                          | 1200                                     | 25 ( <i>S</i> ) |
| 6     | <b>8</b>  | ( <i>S,S</i> )-DPEN                  | 120        | 78                          | 1100                                     | 16 ( <i>S</i> ) |
| 7     | <b>9</b>  | en                                   | 120        | 74                          | 400                                      | 13 ( <i>S</i> ) |
| 8     | <b>9</b>  | ampy                                 | 120        | 95                          | 1700                                     | 17 ( <i>R</i> ) |
| 9     | <b>9</b>  | (±)- <i>i</i> Pr-ampy <sup>[c]</sup> | 30         | 97                          | 6700                                     | 17 ( <i>R</i> ) |
| 10    | <b>9</b>  | ( <i>S,S</i> )-DPEN                  | 120        | 94                          | 700                                      | 32 ( <i>R</i> ) |
| 11    | <b>10</b> | en                                   | 120        | 48                          | -                                        | 13 ( <i>R</i> ) |
| 12    | <b>10</b> | ampy                                 | 120        | 86                          | 1800                                     | 66( <i>R</i> )  |
| 13    | <b>10</b> | ( <i>R,R</i> )-DPEN                  | 120        | 85                          | 800                                      | 46 ( <i>S</i> ) |
| 14    | <b>10</b> | ( <i>S,S</i> )-DPEN                  | 120        | 46                          | 300                                      | 53 ( <i>R</i> ) |
| 15    | <b>11</b> | en                                   | 120        | 85                          | 3700                                     | -               |
| 16    | <b>12</b> | en                                   | 120        | 46                          | -                                        | -               |
| 17    | <b>13</b> | en                                   | 30         | 97                          | 6000                                     | 18 ( <i>S</i> ) |
| 18    | <b>13</b> | (±)- <i>i</i> Pr-ampy <sup>[c]</sup> | 5          | 97                          | 19000                                    | 24 ( <i>S</i> ) |
| 19    | <b>13</b> | ( <i>S,S</i> )-DPEN                  | 5          | 96                          | 12000                                    | 19 ( <i>S</i> ) |
| 20    | <b>14</b> | en                                   | 30         | 91                          | 10000                                    | 24 ( <i>R</i> ) |
| 21    | <b>14</b> | ( <i>R,R</i> )-DPEN                  | 30         | 97                          | 18000                                    | 12 ( <i>R</i> ) |
| 22    | <b>14</b> | ( <i>S,S</i> )-DPEN                  | 30         | 92                          | 15000                                    | 26 ( <i>R</i> ) |

<sup>a</sup> The conversion has been determined by GC analysis. <sup>b</sup> Turnover frequency (moles of ketone converted to alcohol per mole of catalyst per hour) at 50% conversion. <sup>c</sup> 2 eq. with respect to the diphosphine precursors.

**Table S2.** Further data regarding the catalytic TH of aldehydes and ketones (0.1 M) to alcohols with complexes **1**, **3-5** and **15-16** (S/C 1000) in 2-propanol at 82 °C, and in the presence of 2 mol % NaOiPr.

| Entry | Complex   | substrate            | Time [min] | Conv. <sup>[a]</sup> [%] |
|-------|-----------|----------------------|------------|--------------------------|
| 1     | <b>1</b>  | benzaldehyde         | 10         | 11                       |
| 2     | <b>3</b>  | benzaldehyde         | 10         | 10                       |
| 3     | <b>4</b>  | benzaldehyde         | 30         | 8                        |
| 4     | <b>5</b>  | benzaldehyde         | 60         | 14                       |
| 5     | <b>5</b>  | 4-bromo-benzaldehyde | 60         | 30                       |
| 6     | <b>15</b> | benzaldehyde         | 60         | 20                       |
| 7     | <b>16</b> | benzaldehyde         | 60         | 25                       |

<sup>a</sup>The conversions has been determined by GC analysis.

**Table S3.** Further data regarding the catalytic HY (30 bar) of ketones (2.0 M) to alcohols with complexes **2**, **15** and KO*t*Bu (2 mol%) as base in EtOH at 70 °C.

| Entry | Complex   | Substrate                        | S/C   | Time [h] | Conv. <sup>[a]</sup> [%] |
|-------|-----------|----------------------------------|-------|----------|--------------------------|
| 1     | <b>2</b>  | tetralone                        | 10000 | 16       | 8                        |
| 2     | <b>2</b>  | benzoin                          | 10000 | 16       | 5                        |
| 3     | <b>15</b> | tetralone                        | 10000 | 16       | 4                        |
| 4     | <b>15</b> | 2'-Me-acetophenone               | 10000 | 16       | 28                       |
| 5     | <b>15</b> | 4'-NO <sub>2</sub> -acetophenone | 10000 | 16       | 1                        |
| 6     | <b>15</b> | benzoin                          | 10000 | 16       | 9                        |

<sup>a</sup>The conversions has been determined by GC analysis.
